# Supplementary material
Source: ML conference proceedings conference paper supplement (https://proceedings.neurips.cc/paper_files/paper/2022/hash/0f5fcf4bff73a3537e0813a38f0d3f76-Abstract.html)
Supplement: Supplementary file 1 [file 0f5fcf4bff73a3537e0813a38f0d3f76-Supplemental-Conference.zip]

Archive with 1,311 entries (1,135 files):
- supplemental/
- supplemental/.DS_Store
- __MACOSX/supplemental/._.DS_Store
- supplemental/fairseq/
- supplemental/readme.md
- __MACOSX/supplemental/._readme.md
- supplemental/appendix.pdf
- __MACOSX/supplemental/._appendix.pdf
- supplemental/transformers/
- supplemental/.idea/
- supplemental/fairseq/data-bin/
- supplemental/fairseq/my_generate.py
- supplemental/fairseq/prepare-wmt14en2de.sh
- supplemental/fairseq/hydra_train.py
- supplemental/fairseq/.DS_Store
- __MACOSX/supplemental/fairseq/._.DS_Store
- supplemental/fairseq/subword-nmt/
- supplemental/fairseq/preprocess.py
- supplemental/fairseq/generate.py
- supplemental/fairseq/test_torch.py
- supplemental/fairseq/fairseq/
- supplemental/fairseq/validate.py
- supplemental/fairseq/run_wmt14.py
- supplemental/fairseq/interactive.py
- supplemental/fairseq/train.py
- supplemental/fairseq/average_checkpoints.py
- supplemental/fairseq/eval_lm.py
- supplemental/fairseq/run_iwslt14.py
- supplemental/fairseq/prepare-iwslt14.sh
- supplemental/fairseq/score.py
- supplemental/transformers/callback.py
- supplemental/transformers/.DS_Store
- __MACOSX/supplemental/transformers/._.DS_Store
- supplemental/transformers/preprocess/
- supplemental/transformers/run_wikibio.py
- supplemental/transformers/run_wmtROEN.py
- supplemental/transformers/optimizers.py
- supplemental/transformers/run_totto.py
- __MACOSX/supplemental/transformers/._run_totto.py
- supplemental/transformers/utils.py
- supplemental/transformers/fastNLP/
- supplemental/transformers/run_xsum.py
- supplemental/transformers/model/
- supplemental/transformers/run_multi_news.py
- supplemental/transformers/inference.py
- __MACOSX/supplemental/transformers/._inference.py
- supplemental/transformers/evaluation/
- supplemental/transformers/dataloader.py
- supplemental/transformers/train_distributed.py
- supplemental/transformers/run_common_gen.py
- supplemental/transformers/run_java_python.py
- supplemental/.idea/inspectionProfiles/
- supplemental/.idea/vcs.xml
- supplemental/.idea/.gitignore
- supplemental/.idea/workspace.xml
- supplemental/.idea/supplemental.iml
- supplemental/.idea/modules.xml
- supplemental/.idea/misc.xml
- supplemental/fairseq/data-bin/.DS_Store
- __MACOSX/supplemental/fairseq/data-bin/._.DS_Store
- supplemental/fairseq/data-bin/iwslt14.tokenized.de-en/
- supplemental/fairseq/subword-nmt/get_vocab.py
- supplemental/fairseq/subword-nmt/subword_nmt/
- supplemental/fairseq/subword-nmt/LICENSE
- supplemental/fairseq/subword-nmt/CHANGELOG.md
- supplemental/fairseq/subword-nmt/learn_joint_bpe_and_vocab.py
- supplemental/fairseq/subword-nmt/apply_bpe.py
- supplemental/fairseq/subword-nmt/README.md
- supplemental/fairseq/subword-nmt/setup.py
- supplemental/fairseq/subword-nmt/.gitignore
- supplemental/fairseq/subword-nmt/.github/
- supplemental/fairseq/subword-nmt/learn_bpe.py
- supplemental/fairseq/subword-nmt/.git/
- supplemental/fairseq/fairseq/.isort.cfg
- supplemental/fairseq/fairseq/CODE_OF_CONDUCT.md
- supplemental/fairseq/fairseq/fairseq.egg-info/
- supplemental/fairseq/fairseq/.DS_Store
- __MACOSX/supplemental/fairseq/fairseq/._.DS_Store
- supplemental/fairseq/fairseq/LICENSE
- supplemental/fairseq/fairseq/.pre-commit-config.yaml
- supplemental/fairseq/fairseq/pyproject.toml
- supplemental/fairseq/fairseq/fairseq/
- supplemental/fairseq/fairseq/.gitmodules
- supplemental/fairseq/fairseq/README.md
- supplemental/fairseq/fairseq/setup.py
- supplemental/fairseq/fairseq/fairseq_cli/
- supplemental/fairseq/fairseq/.gitignore
- supplemental/fairseq/fairseq/CONTRIBUTING.md
- supplemental/fairseq/fairseq/scripts/
- supplemental/fairseq/fairseq/.github/
- supplemental/fairseq/fairseq/train.py
- supplemental/fairseq/fairseq/setup.cfg
- supplemental/fairseq/fairseq/pip-wheel-metadata/
- supplemental/fairseq/fairseq/hubconf.py
- supplemental/fairseq/fairseq/.git/
- supplemental/fairseq/fairseq/.circleci/
- supplemental/transformers/preprocess/preprocess.py
- supplemental/transformers/preprocess/convert_jsonl_dataloader.py
- supplemental/transformers/preprocess/download_datasets.py
- __MACOSX/supplemental/transformers/preprocess/._download_datasets.py
- supplemental/transformers/preprocess/preprocess_totto.py
- supplemental/transformers/fastNLP/embeddings/
- supplemental/transformers/fastNLP/core/
- supplemental/transformers/fastNLP/io/
- supplemental/transformers/fastNLP/__init__.py
- supplemental/transformers/fastNLP/models/
- supplemental/transformers/fastNLP/doc_utils.py
- supplemental/transformers/fastNLP/modules/
- supplemental/transformers/model/metrics.py
- supplemental/transformers/model/model.py
- supplemental/transformers/evaluation/totto/
- supplemental/transformers/evaluation/xsum/
- supplemental/transformers/evaluation/wiki_bio/
- supplemental/transformers/evaluation/code_comment/
- supplemental/transformers/evaluation/multi_news/
- supplemental/transformers/evaluation/wmt_ROEN/
- supplemental/.idea/inspectionProfiles/profiles_settings.xml
- supplemental/.idea/inspectionProfiles/Project_Default.xml
- supplemental/fairseq/data-bin/iwslt14.tokenized.de-en/train.de-en.en.idx
- __MACOSX/supplemental/fairseq/data-bin/iwslt14.tokenized.de-en/._train.de-en.en.idx
- supplemental/fairseq/data-bin/iwslt14.tokenized.de-en/valid.de-en.de.bin
- __MACOSX/supplemental/fairseq/data-bin/iwslt14.tokenized.de-en/._valid.de-en.de.bin
- supplemental/fairseq/data-bin/iwslt14.tokenized.de-en/dict.de.txt
- __MACOSX/supplemental/fairseq/data-bin/iwslt14.tokenized.de-en/._dict.de.txt
- supplemental/fairseq/data-bin/iwslt14.tokenized.de-en/train.de-en.en.bin
- __MACOSX/supplemental/fairseq/data-bin/iwslt14.tokenized.de-en/._train.de-en.en.bin
- supplemental/fairseq/data-bin/iwslt14.tokenized.de-en/valid.de-en.de.idx
- __MACOSX/supplemental/fairseq/data-bin/iwslt14.tokenized.de-en/._valid.de-en.de.idx
- supplemental/fairseq/data-bin/iwslt14.tokenized.de-en/test.de-en.de.bin
- __MACOSX/supplemental/fairseq/data-bin/iwslt14.tokenized.de-en/._test.de-en.de.bin
- supplemental/fairseq/data-bin/iwslt14.tokenized.de-en/test.de-en.de.idx
- __MACOSX/supplemental/fairseq/data-bin/iwslt14.tokenized.de-en/._test.de-en.de.idx
- supplemental/fairseq/data-bin/iwslt14.tokenized.de-en/test.de-en.en.idx
- __MACOSX/supplemental/fairseq/data-bin/iwslt14.tokenized.de-en/._test.de-en.en.idx
- supplemental/fairseq/data-bin/iwslt14.tokenized.de-en/test.de-en.en.bin
- __MACOSX/supplemental/fairseq/data-bin/iwslt14.tokenized.de-en/._test.de-en.en.bin
- supplemental/fairseq/data-bin/iwslt14.tokenized.de-en/dict.en.txt
- __MACOSX/supplemental/fairseq/data-bin/iwslt14.tokenized.de-en/._dict.en.txt
- supplemental/fairseq/data-bin/iwslt14.tokenized.de-en/train.de-en.de.bin
- __MACOSX/supplemental/fairseq/data-bin/iwslt14.tokenized.de-en/._train.de-en.de.bin
- supplemental/fairseq/data-bin/iwslt14.tokenized.de-en/valid.de-en.en.idx
- __MACOSX/supplemental/fairseq/data-bin/iwslt14.tokenized.de-en/._valid.de-en.en.idx
- supplemental/fairseq/data-bin/iwslt14.tokenized.de-en/train.de-en.de.idx
- __MACOSX/supplemental/fairseq/data-bin/iwslt14.tokenized.de-en/._train.de-en.de.idx
- supplemental/fairseq/data-bin/iwslt14.tokenized.de-en/valid.de-en.en.bin
- __MACOSX/supplemental/fairseq/data-bin/iwslt14.tokenized.de-en/._valid.de-en.en.bin
- supplemental/fairseq/data-bin/iwslt14.tokenized.de-en/preprocess.log
- __MACOSX/supplemental/fairseq/data-bin/iwslt14.tokenized.de-en/._preprocess.log
- supplemental/fairseq/subword-nmt/subword_nmt/get_vocab.py
- supplemental/fairseq/subword-nmt/subword_nmt/segment_char_ngrams.py
- supplemental/fairseq/subword-nmt/subword_nmt/tests/
- supplemental/fairseq/subword-nmt/subword_nmt/__init__.py
- supplemental/fairseq/subword-nmt/subword_nmt/learn_joint_bpe_and_vocab.py
- supplemental/fairseq/subword-nmt/subword_nmt/apply_bpe.py
- supplemental/fairseq/subword-nmt/subword_nmt/bpe_toy.py
- supplemental/fairseq/subword-nmt/subword_nmt/learn_bpe.py
- supplemental/fairseq/subword-nmt/subword_nmt/subword_nmt.py
- supplemental/fairseq/subword-nmt/subword_nmt/chrF.py
- supplemental/fairseq/subword-nmt/.github/workflows/
- supplemental/fairseq/subword-nmt/.git/config
- supplemental/fairseq/subword-nmt/.git/objects/
- supplemental/fairseq/subword-nmt/.git/HEAD
- supplemental/fairseq/subword-nmt/.git/info/
- supplemental/fairseq/subword-nmt/.git/logs/
- supplemental/fairseq/subword-nmt/.git/description
- supplemental/fairseq/subword-nmt/.git/hooks/
- supplemental/fairseq/subword-nmt/.git/refs/
- supplemental/fairseq/subword-nmt/.git/index
- supplemental/fairseq/subword-nmt/.git/packed-refs
- supplemental/fairseq/fairseq/fairseq.egg-info/PKG-INFO
- supplemental/fairseq/fairseq/fairseq.egg-info/not-zip-safe
- supplemental/fairseq/fairseq/fairseq.egg-info/SOURCES.txt
- supplemental/fairseq/fairseq/fairseq.egg-info/entry_points.txt
- supplemental/fairseq/fairseq/fairseq.egg-info/requires.txt
- supplemental/fairseq/fairseq/fairseq.egg-info/top_level.txt
- supplemental/fairseq/fairseq/fairseq.egg-info/dependency_links.txt
- supplemental/fairseq/fairseq/fairseq/benchmark/
- supplemental/fairseq/fairseq/fairseq/options.py
- supplemental/fairseq/fairseq/fairseq/tasks/
- supplemental/fairseq/fairseq/fairseq/iterative_refinement_generator.py
- supplemental/fairseq/fairseq/fairseq/nan_detector.py
- supplemental/fairseq/fairseq/fairseq/version.py
- supplemental/fairseq/fairseq/fairseq/ngram_repeat_block.py
- supplemental/fairseq/fairseq/fairseq/distributed/
- supplemental/fairseq/fairseq/fairseq/config/
- supplemental/fairseq/fairseq/fairseq/registry.py
- supplemental/fairseq/fairseq/fairseq/clib/
- supplemental/fairseq/fairseq/fairseq/speech_generator.py
- supplemental/fairseq/fairseq/fairseq/file_chunker_utils.py
- supplemental/fairseq/fairseq/fairseq/optim/
- supplemental/fairseq/fairseq/fairseq/__init__.py
- supplemental/fairseq/fairseq/fairseq/sequence_generator.py
- supplemental/fairseq/fairseq/fairseq/models/
- supplemental/fairseq/fairseq/fairseq/__pycache__/
- supplemental/fairseq/fairseq/fairseq/pdb.py
- supplemental/fairseq/fairseq/fairseq/model_parallel/
- supplemental/fairseq/fairseq/fairseq/tokenizer.py
- supplemental/fairseq/fairseq/fairseq/hub_utils.py
- supplemental/fairseq/fairseq/fairseq/sequence_scorer.py
- supplemental/fairseq/fairseq/fairseq/libbleu.cpython-37m-darwin.so
- supplemental/fairseq/fairseq/fairseq/incremental_decoding_utils.py
- supplemental/fairseq/fairseq/fairseq/utils.py
- supplemental/fairseq/fairseq/fairseq/checkpoint_utils.py
- supplemental/fairseq/fairseq/fairseq/quantization_utils.py
- supplemental/fairseq/fairseq/fairseq/scoring/
- supplemental/fairseq/fairseq/fairseq/file_utils.py
- supplemental/fairseq/fairseq/fairseq/search.py
- supplemental/fairseq/fairseq/fairseq/file_io.py
- supplemental/fairseq/fairseq/fairseq/dataclass/
- supplemental/fairseq/fairseq/fairseq/trainer.py
- supplemental/fairseq/fairseq/fairseq/version.txt
- supplemental/fairseq/fairseq/fairseq/modules/
- supplemental/fairseq/fairseq/fairseq/data/
- supplemental/fairseq/fairseq/fairseq/my_generator.py
- supplemental/fairseq/fairseq/fairseq/logging/
- supplemental/fairseq/fairseq/fairseq/binarizer.py
- supplemental/fairseq/fairseq/fairseq/criterions/
- supplemental/fairseq/fairseq/fairseq/token_generation_constraints.py
- supplemental/fairseq/fairseq/fairseq_cli/__init__.py
- supplemental/fairseq/fairseq/scripts/compare_namespaces.py
- supplemental/fairseq/fairseq/scripts/constraints/
- supplemental/fairseq/fairseq/scripts/compound_split_bleu.sh
- supplemental/fairseq/fairseq/scripts/split_train_valid_docs.py
- supplemental/fairseq/fairseq/scripts/sacrebleu.sh
- supplemental/fairseq/fairseq/scripts/build_sym_alignment.py
- supplemental/fairseq/fairseq/scripts/spm_decode.py
- supplemental/fairseq/fairseq/scripts/__init__.py
- supplemental/fairseq/fairseq/scripts/rm_pt.py
- supplemental/fairseq/fairseq/scripts/count_docs.py
- supplemental/fairseq/fairseq/scripts/spm_encode.py
- supplemental/fairseq/fairseq/scripts/shard_docs.py
- supplemental/fairseq/fairseq/scripts/spm_train.py
- supplemental/fairseq/fairseq/scripts/test_fsdp.sh
- supplemental/fairseq/fairseq/scripts/convert_model.lua
- supplemental/fairseq/fairseq/scripts/read_binarized.py
- supplemental/fairseq/fairseq/scripts/convert_dictionary.lua
- supplemental/fairseq/fairseq/.github/workflows/
- supplemental/fairseq/fairseq/.github/stale.yml
- supplemental/fairseq/fairseq/.github/PULL_REQUEST_TEMPLATE.md
- supplemental/fairseq/fairseq/.github/ISSUE_TEMPLATE.md
- supplemental/fairseq/fairseq/.github/ISSUE_TEMPLATE/
- supplemental/fairseq/fairseq/pip-wheel-metadata/fairseq.dist-info/
- supplemental/fairseq/fairseq/.git/config
- supplemental/fairseq/fairseq/.git/objects/
- supplemental/fairseq/fairseq/.git/HEAD
- supplemental/fairseq/fairseq/.git/info/
- supplemental/fairseq/fairseq/.git/logs/
- supplemental/fairseq/fairseq/.git/description
- supplemental/fairseq/fairseq/.git/hooks/
- supplemental/fairseq/fairseq/.git/refs/
- supplemental/fairseq/fairseq/.git/index
- supplemental/fairseq/fairseq/.git/packed-refs
- supplemental/fairseq/fairseq/.circleci/config.yml
- supplemental/transformers/fastNLP/embeddings/roberta_embedding.py
- supplemental/transformers/fastNLP/embeddings/char_embedding.py
- supplemental/transformers/fastNLP/embeddings/transformers_embedding.py
- supplemental/transformers/fastNLP/embeddings/stack_embedding.py
- supplemental/transformers/fastNLP/embeddings/embedding.py
- supplemental/transformers/fastNLP/embeddings/contextual_embedding.py
- supplemental/transformers/fastNLP/embeddings/__init__.py
- supplemental/transformers/fastNLP/embeddings/elmo_embedding.py
- supplemental/transformers/fastNLP/embeddings/utils.py
- supplemental/transformers/fastNLP/embeddings/bert_embedding.py
- supplemental/transformers/fastNLP/embeddings/static_embedding.py
- supplemental/transformers/fastNLP/embeddings/gpt2_embedding.py
- supplemental/transformers/fastNLP/core/predictor.py
- supplemental/transformers/fastNLP/core/callback.py
- supplemental/transformers/fastNLP/core/field.py
- supplemental/transformers/fastNLP/core/instance.py
- supplemental/transformers/fastNLP/core/metrics.py
- supplemental/transformers/fastNLP/core/tester.py
- supplemental/transformers/fastNLP/core/dist_trainer.py
- supplemental/transformers/fastNLP/core/batch.py
- supplemental/transformers/fastNLP/core/__init__.py
- supplemental/transformers/fastNLP/core/_parallel_utils.py
- supplemental/transformers/fastNLP/core/dataset.py
- supplemental/transformers/fastNLP/core/_logger.py
- supplemental/transformers/fastNLP/core/utils.py
- supplemental/transformers/fastNLP/core/optimizer.py
- supplemental/transformers/fastNLP/core/losses.py
- supplemental/transformers/fastNLP/core/trainer.py
- supplemental/transformers/fastNLP/core/collate_fn.py
- supplemental/transformers/fastNLP/core/sampler.py
- supplemental/transformers/fastNLP/core/vocabulary.py
- supplemental/transformers/fastNLP/core/const.py
- supplemental/transformers/fastNLP/io/pipe/
- supplemental/transformers/fastNLP/io/embed_loader.py
- supplemental/transformers/fastNLP/io/file_reader.py
- supplemental/transformers/fastNLP/io/__init__.py
- supplemental/transformers/fastNLP/io/model_io.py
- supplemental/transformers/fastNLP/io/utils.py
- supplemental/transformers/fastNLP/io/loader/
- supplemental/transformers/fastNLP/io/file_utils.py
- supplemental/transformers/fastNLP/io/data_bundle.py
- supplemental/transformers/fastNLP/models/cnn_text_classification.py
- supplemental/transformers/fastNLP/models/seq2seq_model.py
- supplemental/transformers/fastNLP/models/seq2seq_generator.py
- supplemental/transformers/fastNLP/models/__init__.py
- supplemental/transformers/fastNLP/models/biaffine_parser.py
- supplemental/transformers/fastNLP/models/base_model.py
[truncated: 1,011 more entries]
