# Supplementary material
Source: ML conference proceedings conference paper supplement (https://proceedings.neurips.cc/paper_files/paper/2022/hash/0f5fcf4bff73a3537e0813a38f0d3f76-Abstract.html)
Supplement: Supplementary file 1 [file 0f5fcf4bff73a3537e0813a38f0d3f76-Supplemental-Conference.zip › supplemental/fairseq/data-bin/iwslt14.tokenized.de-en/dict.en.txt]

, 191365
. 161619
the 134708
and 96703
to 78748
of 73872
a 70923
that 59873
i 53541
in 51533
it 49378
you 45799
we 42021
is 41999
&apos;s 36495
this 32249
so 23537
&quot; 22866
they 21065
was 19120
-- 18925
on 18918
for 18906
are 17926
have 17301
what 17106
but 16795
with 15947
can 15341
? 14216
&apos;t 14069
about 13690
there 13604
as 13168
at 13115
be 12900
all 12568
do 11659
not 11571
one 11463
an 11002
&apos;re 10919
my 10868
people 10661
if 10232
like 10169
from 10067
he 9614
or 9602
now 9304
these 9016
just 8963
our 8518
: 8417
because 8220
when 8211
very 8191
me 7937
out 7895
how 7752
by 7677
know 7402
up 7391
them 7302
going 7183
which 6912
more 6739
here 6726
think 6718
had 6697
see 6615
who 6383
ed 6359
your 6320
ing 6307
really 6292
us 6280
their 6187
get 6177
would 6084
then 6076
were 6047
&apos;ve 5921
re@@ 5787
world 5765
some 5638
time 5614
&apos;m 5573
has 5360
way 5332
actually 5304
don 5278
into 5181
where 5052
things 4969
will 4873
years 4871
go 4864
other 4689
no 4589
well 4537
es 4526
could 4503
want 4446
make 4314
-@@ 4255
been 4255
said 4252
right 4213
she 4084
something 4039
first 3851
two 3827
than 3801
those 3793
s 3771
in@@ 3767
c@@ 3759
y 3746
his 3744
look 3738
thing 3692
little 3652
new 3609
got 3595
also 3558
much 3518
back 3452
s@@ 3451
life 3449
say 3425
work 3424
; 3385
most 3372
over 3348
a@@ 3320
only 3234
e@@ 3211
even 3186
take 3155
kind 3140
un@@ 3073
many 3072
able 3060
did 3006
need 2976
al 2946
good 2931
lot 2898
around 2867
ti@@ 2858
why 2843
down 2816
let 2815
come 2802
&apos;ll 2768
ted 2760
d@@ 2715
t@@ 2713
o@@ 2707
different 2691
use 2687
every 2685
de@@ 2664
her 2664
through 2664
i@@ 2618
p@@ 2589
day 2572
g@@ 2570
ts 2513
being 2498
put 2475
same 2474
its 2444
doing 2398
e 2393
co@@ 2379
b@@ 2336
li@@ 2292
three 2278
en@@ 2260
er 2260
y@@ 2260
ma@@ 2250
called 2238
con@@ 2222
di@@ 2202
any 2201
made 2156
percent 2156
talk 2149
&apos;d 2144
u@@ 2111
m 2103
ds 2081
ated 2078
today 2078
after 2063
great 2060
o 2003
tell 1994
ar@@ 1977
year 1966
human 1959
ly 1956
po@@ 1956
big 1922
ers 1921
fact 1917
another 1913
find 1909
ri@@ 1901
se@@ 1879
own 1875
last 1872
p 1864
idea 1855
didn 1830
before 1825
change 1825
give 1820
dis@@ 1816
went 1799
should 1796
started 1784
ro@@ 1782
thought 1774
m@@ 1773
pro@@ 1763
tions 1749
ting 1748
le 1745
al@@ 1740
an@@ 1739
le@@ 1736
t 1733
off 1722
story 1706
v@@ 1699
end 1697
man 1694
l@@ 1690
never 1687
course 1680
again 1678
better 1678
important 1678
ve 1675
ate 1671
ation 1663
r@@ 1653
f@@ 1650
system 1640
k@@ 1638
show 1635
on@@ 1630
te 1629
does 1626
him 1623
problem 1621
d 1618
start 1618
ch@@ 1611
next 1608
might 1607
ad@@ 1606
water 1604
each 1601
still 1599
together 1598
ago 1596
part 1596
place 1594
lo@@ 1592
used 1592
brain 1578
technology 1577
came 1568
thank 1559
as@@ 1543
bit 1539
com@@ 1534
or@@ 1517
th@@ 1506
&apos; 1499
between 1479
long 1477
few 1470
ra@@ 1469
looking 1466
ating 1457
h@@ 1457
too 1457
se 1452
c 1450
point 1441
mean 1437
st@@ 1436
children 1432
ce 1427
ac@@ 1425
ex@@ 1414
try 1405
maybe 1397
done 1393
pre@@ 1391
sort 1383
tion 1378
bi@@ 1374
ever 1374
found 1373
less 1362
ded 1359
question 1359
bo@@ 1357
ous 1352
whole 1351
doesn 1350
si@@ 1348
data 1341
ding 1340
love 1340
school 1338
it@@ 1335
sh@@ 1332
example 1329
red 1323
understand 1323
light 1320
may 1318
wanted 1318
at@@ 1308
ty 1308
am 1304
four 1304
l 1304
ke 1296
pe@@ 1285
working 1284
using 1281
ct 1278
ent 1272
live 1272
w@@ 1271
million 1269
real 1267
trying 1263
el@@ 1259
women 1253
be@@ 1252
call 1251
old 1249
away 1247
pi@@ 1247
vi@@ 1231
money 1229
power 1228
person 1224
10 1223
everything 1221
ck 1219
always 1217
kids 1217
g 1214
ic 1214
ction 1209
mi@@ 1209
believe 1207
per@@ 1203
feel 1195
ni@@ 1195
age 1194
five 1193
est 1190
ally 1189
ks 1187
design 1184
sc@@ 1181
ab@@ 1172
country 1170
space 1168
help 1167
par@@ 1146
k 1141
thinking 1141
number 1140
times 1140
comes 1139
h 1139
create 1138
b 1137
car@@ 1137
de 1133
ary 1132
im@@ 1132
took 1126
second 1123
information 1122
me@@ 1112
am@@ 1109
energy 1107
n@@ 1104
food 1102
ta@@ 1101
means 1099
city 1097
op@@ 1095
making 1092
sense 1092
es@@ 1085
! 1081
als 1079
getting 1077
j@@ 1077
future 1074
become 1071
quite 1070
enough 1065
ves 1065
mo@@ 1060
do@@ 1056
best 1055
to@@ 1055
small 1054
mar@@ 1053
science 1053
says 1052
probably 1051
building 1048
ons 1047
king 1046
fe@@ 1044
la@@ 1044
bu@@ 1040
side 1040
ability 1034
without 1026
um 1025
home 1021
play 1018
ine 1017
ne@@ 1015
left 1010
w 1010
interesting 1009
stuff 1009
social 1004
body 1003
talking 1003
su@@ 999
der 994
ant 993
ment 993
er@@ 990
room 988
ist 985
ways 985
africa 982
coming 982
happened 981
tic 976
earth 975
ses 972
ties 972
pa@@ 970
th 967
tra@@ 967
em@@ 966
men 965
dollars 963
tive 959
build 956
half 949
form 946
ge@@ 946
is@@ 945
set 945
anything 944
ask 944
ter 943
te@@ 942
cted 940
line 936
no@@ 932
ar 930
x 930
goes 929
while 929
art 927
hi@@ 926
seen 921
simple 921
makes 920
pretty 920
days 919
he@@ 917
lives 917
move 915
told 911
across 910
ok 908
20 906
case 904
cor@@ 904
ble 903
once 903
happen 901
ies 901
ver@@ 900
such 898
gra@@ 896
living 895
basically 894
ps 894
inter@@ 885
else 884
project 884
saw 884
book 883
health 880
yet 878
imagine 877
ance 875
picture 873
des 871
moment 871
hand 870
ch 869
countries 869
fi@@ 868
happens 866
bad 863
sa@@ 862
having 859
care 857
mind 854
okay 853
.@@ 852
family 852
car 849
experience 846
hard 844
asked 842
sure 842
problems 840
global 839
sts 839
later 838
ged 836
ideas 832
high 831
oh 829
ones 828
learn 827
young 827
ci@@ 826
ho@@ 826
nature 826
computer 825
for@@ 823
mon@@ 822
ir@@ 821
ors 820
z@@ 819
inside 813
ms 813
ful 812
business 810
ck@@ 809
planet 806
tri@@ 805
everybody 804
cy 803
n 802
six 802
process 800
history 797
reason 794
saying 793
ins 792
min@@ 792
son 792
states 792
nothing 791
both 790
ws 790
so@@ 788
over@@ 779
single 779
whether 778
almost 777
ely 777
within 777
cu@@ 776
ol@@ 775
r 774
looks 773
per 772
sing 771
cells 770
billion 768
child 768
gu@@ 768
far 767
top 765
ha@@ 763
already 762
ings 762
50 761
bring 761
wrong 760
ca@@ 757
state 757
music 756
remember 756
keep 754
ans 751
ity 751
f 749
under@@ 749
guy 748
ge 747
land 744
possible 744
true 742
war 742
cancer 740
0s 739
heard 736
order 735
hope 733
3@@ 732
zed 732
beautiful 731
looked 731
her@@ 730
ent@@ 728
house 725
often 725
ter@@ 725
du@@ 723
matter 723
under 723
sub@@ 721
&amp; 719
open 719
pri@@ 716
face 714
gets 714
gi@@ 713
piece 713
ging 711
group 711
30 709
qu@@ 709
pres@@ 708
yes 708
built 707
sp@@ 707
video 706
che@@ 705
months 705
india 704
read 704
amazing 703
mu@@ 703
trans@@ 703
works 703
community 702
answer 701
ze 700
late 698
public 698
god 696
stories 696
someone 695
taking 693
universe 693
sti@@ 692
myself 691
ments 690
united 690
ars 689
places 689
da@@ 688
ved 687
instead 686
head 685
since 683
words 683
education 682
research 681
until 681
isn 676
il@@ 675
ourselves 675
species 675
sta@@ 674
sometimes 673
tu@@ 671
ul@@ 670
control 668
out@@ 666
sur@@ 666
res@@ 665
government 664
turn 664
ving 663
les 662
decided 661
ur@@ 661
den@@ 660
d-@@ 659
somebody 659
... 656
internet 656
ness 656
ents 655
couple 652
ence 652
pl@@ 651
ates 650
level 650
language 649
night 649
ste@@ 648
turns 648
na@@ 647
rather 647
heart 646
ces 645
cre@@ 645
led 645
middle 643
tional 643
exactly 642
happy 642
fo@@ 639
can@@ 637
wasn 634
el 633
kinds 633
everyone 632
ot@@ 632
though 632
ber@@ 631
man@@ 631
mis@@ 631
stop 629
itself 627
large 627
yeah 627
rate 626
run 626
sion 626
ru@@ 625
fa@@ 624
mother 624
completely 623
je@@ 623
ph@@ 622
themselves 622
woman 622
animals 620
cks 620
minutes 620
word 619
students 618
front 617
society 616
ations 615
became 614
game 613
dra@@ 610
job 609
model 608
must 608
om@@ 608
100 607
jo@@ 607
share 607
company 606
happening 604
et@@ 603
re 603
act 601
name 601
learned 599
created 598
environment 598
friends 597
hear 597
study 597
wa@@ 597
huge 595
ju@@ 593
oil 593
x@@ 593
america 592
hours 592
ling 592
systems 592
y-@@ 592
&#91; 591
&#93; 591
cal 591
4@@ 590
news 589
shows 588
table 588
third 588
br@@ 586
et 584
century 583
natural 582
won 582
bar@@ 580
stic 580
view 580
disease 579
har@@ 579
ag@@ 578
guys 577
sound 577
cr@@ 576
sed 575
along 573
worked 572
american 571
ry 570
sen@@ 570
china 569
flo@@ 566
questions 566
figure 564
perhaps 564
self-@@ 564
market 563
particular 563
fish 562
moving 562
sha@@ 562
turned 562
based 561
early 561
go@@ 561
knew 561
ger 560
lin@@ 560
ten@@ 560
air 559
wi@@ 559
against 558
em 558
couldn 557
lots 557
others 557
ters 557
ure 556
area 555
col@@ 554
gh@@ 552
gave 551
cur@@ 550
during 550
known 550
sted 550
zing 550
learning 549
ocean 549
past 549
sho@@ 546
cra@@ 543
ked 543
takes 543
wing 543
and@@ 541
machine 541
test 541
ali@@ 540
cally 540
scale 539
war@@ 539
least 538
us@@ 536
cell 535
cts 533
outside 533
um@@ 533
finally 530
free 530
father 529
culture 527
difference 526
ga@@ 526
tation 526
15 525
wonderful 525
clo@@ 524
seven 524
ture 524
des@@ 523
entire 523
needs 523
ying 523
taken 522
ics 519
close 518
ined 517
tor@@ 517
we@@ 515
au@@ 514
5@@ 512
ari@@ 511
ator 510
phone 510
ce@@ 509
der@@ 509
thousands 509
e-@@ 506
cing 505
ground 504
pos@@ 504
powerful 504
sk@@ 504
key 502
parts 502
whatever 502
changed 499
population 499
seeing 499
york 497
yourself 497
grow 496
beginning 495
bor@@ 495
cost 494
given 494
tr@@ 494
behind 493
certain 493
leave 493
st 492
eyes 491
ev@@ 490
image 490
stage 490
pped 489
spend 488
size 487
audience 486
ess 485
ges 485
parents 485
green 484
2 483
easy 482
super@@ 482
walk 482
amount 481
ches 481
terms 481
fly 480
ism 480
gs 479
force 478
ia 478
interested 478
ap@@ 477
death 477
cannot 476
economic 476
rest 476
center 475
eight 475
media 475
ver 474
common 471
off@@ 470
team 470
buy 469
full 469
ou@@ 468
difficult 467
7@@ 466
books 466
dy 466
id 466
began 465
cri@@ 465
local 465
ser@@ 465
va@@ 465
tion@@ 464
gl@@ 462
gone 462
hu@@ 461
rec@@ 461
week 460
fu@@ 459
wor@@ 459
cities 457
hands 457
mit 457
ously 457
friend 456
gr@@ 455
ders 454
needed 453
bur@@ 452
ned 452
paper 452
u 452
bri@@ 451
longer 451
low 451
ship 451
simply 451
field 450
hold 450
black 449
cting 448
deal 448
realized 448
spent 448
value 448
either 447
humans 447
incredible 447
6@@ 446
dan@@ 446
wh@@ 446
ec@@ 445
fac@@ 444
tried 443
pen@@ 441
tors 441
born 440
national 440
ase 439
char@@ 439
dly 439
ie 439
lt 439
stri@@ 439
forward 438
step 438
growth 437
mor@@ 437
quickly 435
surface 435
feet 434
fin@@ 434
sitting 434
companies 433
ic@@ 433
watch 433
ality 432
clear 431
tan@@ 431
up@@ 431
ven@@ 431
complex 430
lation 430
pu@@ 430
west 430
structure 428
girl 427
ja@@ 427
lost 427
dna 426
gre@@ 426
0,000 425
knowledge 425
wouldn 425
20@@ 424
40 424
cap@@ 424
growing 424
blue 423
stra@@ 423
met 422
pay 422
dri@@ 421
ice 421
miles 421
8@@ 420
die 419
str@@ 417
19@@ 416
ens 416
micro@@ 416
nu@@ 416
political 416
south 416
9@@ 415
poor 415
white 415
pt 413
eat 412
economy 412
8 411
animal 411
ell@@ 411
felt 411
fun 411
weeks 411
3 410
els 410
fl@@ 410
ma 410
sea 410
sting 410
behavior 409
cked 409
reality 409
technologies 409
ger@@ 408
giving 408
tur@@ 408
,000 407
opportunity 407
brought 405
changes 405
developed 405
pur@@ 405
street 404
bs 403
morning 402
personal 402
squ@@ 402
telling 402
wrote 402
ys 402
anyone 401
patients 401
scientists 401
ats 400
/ 398
cy@@ 398
starting 398
stor@@ 398
cho@@ 397
cut 397
mer@@ 397
write 397
yo@@ 396
fast 395
program 395
theory 395
feeling 394
patient 394
ton 394
cking 393
ori@@ 393
areas 392
cer@@ 392
ei@@ 392
images 392
gener@@ 391
gives 390
nice 390
ched 388
bed 387
mate 387
understanding 387
air@@ 386
bio@@ 386
tical 386
u.s. 386
climate 385
spi@@ 385
sun 385
attention 384
discovered 384
inten@@ 384
yed 384
equ@@ 383
vo@@ 383
short 382
4 381
fied 381
literally 381
material 381
por@@ 381
tro@@ 381
ning 380
speak 380
the@@ 379
eg@@ 378
film 378
seems 378
ard 377
cars 377
dro@@ 377
forms 377
mine 377
numbers 377
tools 377
mil@@ 376
non-@@ 376
playing 376
produce 376
vision 376
cul@@ 375
7 374
average 374
ba@@ 374
board 374
fully 374
hand@@ 374
realize 374
ke@@ 373
bra@@ 372
ently 372
challenge 371
died 370
ented 370
main 370
ths 370
1 369
absolutely 368
access 367
bl@@ 367
normal 367
ster 367
bottom 366
changing 366
law 366
pping 366
running 366
uses 366
ical 365
lu@@ 365
physical 365
developing 364
gro@@ 364
hundreds 364
1@@ 363
alone 363
head@@ 363
individual 363
ther 362
6 361
ban@@ 361
creating 361
girls 361
millions 361
movement 361
result 361
shape 361
12 360
deep 360
modern 360
nobody 360
tru@@ 360
auth@@ 359
ob@@ 359
map 358
physi@@ 358
und@@ 358
bes 357
colle@@ 357
quality 357
sive 357
vis@@ 357
english 355
lab 355
recently 355
compassion 354
development 353
lar@@ 353
cs 352
focus 352
ology 352
product 352
wish 352
ns 351
swe@@ 351
web 351
dar@@ 350
gen@@ 350
gers 350
showed 350
solution 350
wall 350
connected 349
relationship 349
stand 349
vers 348
9 347
cli@@ 347
designed 347
ement 347
knows 347
anybody 346
major 346
cat@@ 345
tiny 345
blood 344
industry 344
innovation 344
obviously 344
seem 344
coun@@ 343
don@@ 343
moved 343
position 343
box 342
dark 342
ingly 342
kid 342
chinese 341
ctions 341
likely 341
pan@@ 341
soon 341
support 341
talked 341
cool 340
fall 340
generation 340
issue 340
revolution 340
begin 339
incredibly 339
allow 338
available 338
especially 338
evolution 338
medical 338
save 338
ill 337
writing 337
haven 336
kes 336
she@@ 336
wal@@ 336
199@@ 335
class 335
cop@@ 335
experiment 335
north 335
pe 335
tics 335
wn 335
pla@@ 334
becomes 333
cal@@ 333
dic@@ 333
materials 333
online 333
security 333
solve 333
ther@@ 333
type 333
university 333
wer 333
effect 332
happiness 332
lived 332
prin@@ 332
25 331
beyond 331
mental 331
perfect 331
present 331
bat@@ 330
explain 330
fra@@ 330
od@@ 330
tend 329
all@@ 328
bigger 328
cles 328
continu@@ 328
dr@@ 328
hor@@ 328
please 328
— 328
deli@@ 327
games 327
guess 327
ining 327
ster@@ 327
computers 326
oper@@ 326
tes 326
aren 325
reasons 325
5 324
depen@@ 324
hour 324
ig@@ 324
resources 324
situation 324
bas@@ 323
drive 323
europe 323
fear 323
impact 323
east 322
ff@@ 322
ared 321
device 321
fil@@ 321
groups 321
network 321
putting 321
town 321
cro@@ 320
digital 320
inv@@ 320
medi@@ 320
scientific 320
dead 319
office 319
worth 319
active 318
source 318
tells 318
rules 317
mass 316
meet 316
schools 316
sters 316
en 315
gt 315
star@@ 315
syn@@ 315
action 314
baby 314
color 314
ll@@ 314
pal@@ 314
sal@@ 314
teach 314
eless 312
lines 312
ment@@ 312
pictures 312
similar 312
sions 312
sli@@ 312
voice 312
chance 311
fir@@ 311
os 311
pac@@ 311
several 311
special 311
towards 311
vent@@ 311
ced 310
cket 309
general 309
involved 309
teachers 309
ted@@ 309
activity 308
issues 308
tic@@ 308
mal@@ 307
particularly 307
risk 307
wind 307
appe@@ 306
door 306
gue 306
indeed 306
mission 306
road 306
suddenly 306
0@@ 305
asi@@ 305
il 305
projects 305
solar 305
asking 304
break 304
onto 304
est@@ 303
ker 303
men@@ 303
sil@@ 303
sounds 302
basic 301
boy 301
evidence 301
pas@@ 301
certainly 300
hundred 300
ls 300
ped 300
robot 300
speed 300
truth 300
carbon 299
eye 299
impro@@ 299
vel@@ 299
60 298
ad 298
fer 298
mic 298
minute 298
nine 298
sel@@ 298
formed 297
ing@@ 297
listen 297
message 297
object 297
prote@@ 297
om 296
stay 296
strong 296
village 296
anyway 295
ching 295
code 295
lea@@ 295
list 295
talks 295
choice 294
wants 294
hit 293
mp@@ 293
positive 293
tre@@ 293
ber 292
cations 292
hal@@ 292
month 292
80 291
clu@@ 291
moral 291
poli@@ 291
college 290
examples 290
plants 290
brea@@ 289
econom@@ 289
gar@@ 289
recor@@ 289
starts 289
walking 289
ators 288
grand@@ 288
matic 288
spo@@ 288
tives 288
ust 288
blo@@ 287
cam@@ 287
cin@@ 287
dec@@ 287
high-@@ 287
showing 287
uni@@ 287
everywhere 286
exciting 286
further 286
interest 286
pain@@ 286
pattern 286
reach 286
ready 286
skin 286
smart 286
version 286
fire 285
indi@@ 285
ligh@@ 285
notice 285
software 285
wait 285
bon@@ 284
chan@@ 284
exc@@ 284
ki@@ 284
wo@@ 284
ative 283
top@@ 283
democracy 282
develop 282
journey 282
nuclear 282
page 282
plan 282
sent 282
totally 282
ably 281
add 281
biggest 281
eth@@ 281
fer@@ 281
follow 281
measure 281
my@@ 281
potential 281
2@@ 280
extraordinary 280
ill@@ 280
loo@@ 280
ner 280
send 280
sit 280
ature 279
esti@@ 279
mes 279
named 279
period 279
self 279
sig@@ 279
18@@ 278
fri@@ 278
san@@ 278
student 278
teacher 278
tun@@ 278
among 277
ases 277
ended 277
grew 277
ler 277
row 277
ures 277
hop@@ 276
pick 276
back@@ 275
google 275
lose 275
medicine 275
ants 274
bel@@ 274
eventually 274
ctive 273
dou@@ 273
hospital 273
lead 273
poverty 273
stat@@ 273
store 273
ye@@ 273
buildings 272
cent 272
cla@@ 272
posed 272
tal 272
cultural 271
ences 271
except 271
extremely 271
foot@@ 271
han@@ 271
largest 271
peace 271
points 271
t-@@ 271
z 271
alized 270
approach 270
cause 270
far@@ 270
international 270
jobs 270
organization 270
pul@@ 270
visual 270
arm 269
essentially 269
hiv 269
success 269
sun@@ 269
tat@@ 269
usually 269
watching 269
camera 268
da 268
hol@@ 268
ner@@ 268
ot 268
products 268
standing 268
continue 267
gas 267
objects 267
smo@@ 267
dance 266
nor@@ 266
older 266
tically 266
aging 265
ini@@ 265
ore 265
ran@@ 265
results 265
trees 265
200 264
500 264
david 264
foot 264
spread 264
yp@@ 264
ani@@ 263
cian 263
cies 263
electricity 263
series 263
vie@@ 263
wards 263
cru@@ 262
somewhere 262
brains 261
bro@@ 261
safe 261
sing@@ 261
tly 261
wed 261
acc@@ 260
ages 260
comp@@ 260
dete@@ 260
med 260
mit@@ 260
movie 259
ren@@ 259
rich 259
conver@@ 258
ession 258
expect 258
ish 258
minds 258
obser@@ 258
somehow 258
creative 257
electr@@ 257
infe@@ 257
sex 257
sus@@ 257
0-@@ 256
doctor 256
ght 256
ines 256
leaders 256
ow@@ 256
ral 256
regi@@ 256
sam@@ 256
ben@@ 255
impossible 255
larger 255
models 255
mom 255
studies 255
thousand 255
wife 255
bom@@ 254
expensive 254
higher 254
meaning 254
ming 254
ots 254
shot 254
thre@@ 254
ve@@ 254
arch@@ 253
bal@@ 253
crazy 253
ele@@ 253
killed 253
ony 253
sell 253
serious 253
shown 253
ward 253
african 252
allowed 252
sorts 252
training 252
plant 251
sto@@ 251
touch 251
above 250
conditions 250
faces 250
finding 250
including 250
mm@@ 250
pieces 250
site 250
ute 250
written 250
11 249
beauty 249
ey 249
refle@@ 249
therefore 249
ball 248
belie@@ 248
rel@@ 248
stars 248
traditional 248
tree 248
cen@@ 247
den 247
ered 247
excited 247
fli@@ 247
hab@@ 247
income 247
tively 247
architecture 246
biology 246
connect 246
fine 246
flu@@ 246
individuals 246
production 246
reading 246
screen 246
sou@@ 246
trust 246
und 246
ak@@ 245
bacteria 245
cover 245
crisis 245
goal 245
provi@@ 245
supposed 245
taught 245
complicated 244
dent 244
dream 244
ed@@ 244
ically 244
perspective 244
truly 244
upon 244
drugs 243
essi@@ 243
pers 243
18 242
ama@@ 242
families 242
famous 242
main@@ 242
rise 242
tool 242
vation 242
violence 242
bodies 241
drug 241
faster 241
favorite 241
seconds 241
swi@@ 241
combin@@ 240
fantastic 240
fla@@ 240
healthy 240
hon@@ 240
sh 240
fight 239
fre@@ 239
neuro@@ 239
role 239
treatment 239
zero 239
anti@@ 238
communities 238
content 238
dat@@ 238
down@@ 238
kill 238
math 238
mechan@@ 238
region 238
struc@@ 238
alive 237
himself 237
ide@@ 237
ops 237
person@@ 237
pp@@ 237
cl@@ 236
lon@@ 236
neurons 236
press 236
ast 235
cle@@ 235
freedom 235
hot 235
response 235
well-@@ 235
worse 235
aff@@ 234
cases 234
dad 234
meant 234
range 234
ris@@ 234
service 234
sky 234
successful 234
throughout 234
although 233
bul@@ 233
cep@@ 233
enti@@ 233
fy 233
genes 233
humanity 233
mal 233
one-@@ 233
skills 233
wat@@ 233
bunch 232
conven@@ 232
fundamental 232
price 232
tou@@ 232
zation 232
inclu@@ 231
machines 231
pain 231
resi@@ 231
s-@@ 231
square 231
sum@@ 231
ton@@ 231
ak 230
exp@@ 230
ian 230
kept 230
lies 230
physics 230
rele@@ 230
ta 230
wel@@ 230
western 230
central 229
earlier 229
flow 229
fore@@ 229
gotten 229
liber@@ 229
military 229
three-@@ 229
tor 229
win 229
actual 228
beings 228
bing 228
clearly 228
hy@@ 228
policy 228
pra@@ 228
ries 228
strange 228
zes 228
concept 227
context 227
fro@@ 227
mas@@ 227
recognize 227
rela@@ 227
smaller 227
tivity 227
americans 226
fru@@ 226
hing 226
patterns 226
rights 226
shor@@ 226
vari@@ 226
vely 226
choose 225
consi@@ 225
familiar 225
ll 225
progress 225
to-@@ 225
waste 225
ach@@ 224
engineering 224
non@@ 224
after@@ 223
ands 223
bre@@ 223
connection 223
consider 223
costs 223
ful@@ 223
hey 223
invented 223
listening 223
massive 223
ners 223
pat@@ 223
power@@ 223
record 223
tain 223
thanks 223
unded 223
wonder 223
acy 222
aid 222
allows 222
anywhere 222
del@@ 222
demon@@ 222
ess@@ 222
eu@@ 222
human@@ 222
ise 222
repres@@ 222
solutions 222
terri@@ 222
values 222
virus 222
waiting 222
contribu@@ 221
cycle 221
dness 221
greater 221
inst@@ 221
oc@@ 221
plastic 221
slow 221
treat 221
weight 221
dist@@ 220
draw 220
nan@@ 220
president 220
tent 220
ale 219
driving 219
ear@@ 219
ited 219
poin@@ 219
decisions 218
museum 218
print 218
provide 218
tv 218
ant@@ 217
cated 217
critical 217
dangerous 217
date 217
dollar 217
effective 217
extra@@ 217
magic 217
o-@@ 217
surgery 217
tin@@ 217
app@@ 216
cent@@ 216
edi@@ 216
fun@@ 216
related 216
religion 216
sustainable 216
198@@ 215
argu@@ 215
ast@@ 215
aware 215
clean 215
ese 215
fr@@ 215
however 215
ka@@ 215
new@@ 215
none 215
photograph@@ 215
politics 215
protect 215
ray 215
remarkable 215
robots 215
teaching 215
conference 214
forming 214
fuel 214
ham@@ 214
hea@@ 214
ils 214
intelligence 214
star 214
travel 214
two-@@ 214
walked 214
whose 214
anymore 213
artist 213
conc@@ 213
conversation 213
current 213
diversity 213
exist 213
im 213
becoming 212
direction 212
legs 212
liter@@ 212
produ@@ 212
repor@@ 212
rule 212
song 212
v 212
clim@@ 211
cou@@ 211
ements 211
forest 211
gic 211
glass 211
hole 211
john 211
nur@@ 211
ods 211
quar@@ 211
thi@@ 211
train 211
win@@ 211
docum@@ 210
flying 210
ft 210
gen 210
on-@@ 210
understood 210
wers 210
bank 209
dge 209
genetic 209
histor@@ 209
insi@@ 209
mile 209
practice 209
respon@@ 209
scientist 209
clin@@ 208
explor@@ 208
floor 208
immediately 208
lations 208
pull 208
shu@@ 208
slide 208
specific 208
st-@@ 208
subject 208
ah 207
ame 207
cians 207
conser@@ 207
dog 207
greatest 207
increase 207
re-@@ 207
reach@@ 207
zen 207
dom@@ 206
encoura@@ 206
enormous 206
fis@@ 206
function 206
ghts 206
hed 206
irs 206
markets 206
tho@@ 206
website 206
decade 205
environmental 205
glo@@ 205
lower 205
phones 205
produced 205
speaking 205
vic@@ 205
ately 204
conclu@@ 204
dd@@ 204
ff 204
lab@@ 204
lin 204
sequence 204
creativity 203
disappe@@ 203
fol@@ 203
la 203
land@@ 203
que 203
raise 203
whe@@ 203
chemical 202
cold 202
commit@@ 202
feed 202
following 202
forth 202
performance 202
thetic 202
alism 201
complete 201
divi@@ 201
ets 201
forces 201
forget 201
ha 201
ial 201
ima@@ 201
lat@@ 201
ley 201
mars 201
matically 201
photograph 201
qui@@ 201
ration 201
some@@ 201
television 201
temperature 201
weren 201
ads 200
agree 200
assu@@ 200
lau@@ 200
lights 200
networks 200
occu@@ 200
pol@@ 200
private 200
pun@@ 200
recogni@@ 200
survive 200
various 200
ven 200
70 199
boys 199
cha@@ 199
chair 199
essed 199
inspired 199
lands 199
pit@@ 199
played 199
services 199
stre@@ 199
suff@@ 199
sy@@ 199
unfortunately 199
useful 199
val@@ 199
capit@@ 198
fund@@ 198
police 198
shared 198
sharing 198
summer 198
unique 198
ahead 197
comm@@ 197
conflict 197
doctors 197
evolved 197
gene 197
near 197
scri@@ 197
stick 197
track 197
tt@@ 197
urban 197
x-@@ 197
ash 196
birds 196
bly 196
bringing 196
fron@@ 196
loved 196
meeting 196
original 196
possibly 196
ran 196
recent 196
chi@@ 195
fan@@ 195
final 195
grade 195
helped 195
net 195
passion 195
path 195
actions 194
arts 194
babies 194
classi@@ 194
funny 194
pair 194
publi@@ 194
societies 194
thro@@ 194
trade 194
types 194
90 193
cher 193
consciousness 193
directly 193
effects 193
institutions 193
mel@@ 193
mostly 193
psych@@ 193
surro@@ 193
vac@@ 193
destro@@ 192
discover 192
entation 192
lan@@ 192
levels 192
london 192
park 192
wir@@ 192
aids 191
attra@@ 191
experiments 191
hi 191
indian 191
moon 191
oni@@ 191
sign 191
vol@@ 191
alization 190
dig@@ 190
enter@@ 190
genome 190
heat 190
industrial 190
mer 190
mes@@ 190
obvious 190
pris@@ 190
search 190
shi@@ 190
spe@@ 190
tex@@ 190
below 189
bes@@ 189
ble@@ 189
career 189
financial 189
radi@@ 189
reali@@ 189
sat 189
sor@@ 189
sorry 189
stance 189
dr. 188
exten@@ 188
island 188
mobile 188
mot@@ 188
mp 188
slo@@ 188
workers 188
year-old 188
daughter 187
dest 187
focused 187
ky 187
16 186
audi@@ 186
biological 186
bought 186
challenges 186
diagno@@ 186
emotional 186
era 186
fle@@ 186
governments 186
ny 186
ple 186
scre@@ 186
stream 186
terrible 186
afghanistan 185
ancient 185
birth 185
capacity 185
circu@@ 185
ek 185
explore 185
nation 185
onic 185
tac@@ 185
task 185
uring 185
vot@@ 185
artists 184
ased 184
bill 184
capital 184
decide 184
eating 184
green@@ 184
kin@@ 184
laws 184
ological 184
ror 184
ss 184
term 184
willing 184
agre@@ 183
decision 183
exi@@ 183
expected 183
explo@@ 183
fit 183
gri@@ 183
multi@@ 183
na 183
wood 183
5,000 182
ca 182
causes 182
communication 182
domin@@ 182
event 182
instance 182
ologists 182
rever@@ 182
turning 182
twice 182
complexity 181
le-@@ 181
paid 181
purpose 181
shed 181
sleep 181
auto@@ 180
balance 180
carry 180
closer 180
dying 180
efficient 180
enting 180
infrastructure 180
popular 180
pressure 180
spending 180
stone 180
straight 180
trial 180
was@@ 180
worry 180
accu@@ 179
character 179
chris 179
dre@@ 179
gh 179
len@@ 179
pass 179
plan@@ 179
predic@@ 179
push 179
rema@@ 179
slightly 179
bot@@ 178
decades 178
diseases 178
dy@@ 178
molecules 178
mul@@ 178
ory 178
our@@ 178
surprising 178
temp@@ 178
yers 178
break@@ 177
devices 177
hom@@ 177
vering 177
zo@@ 177
address 176
ass 176
bits 176
broken 176
charge 176
leg@@ 176
secret 176
$ 175
300 175
cate 175
cros@@ 175
descri@@ 175
drop 175
eli@@ 175
ell 175
ency 175
fortun@@ 175
memory 175
meters 175
ping 175
quick 175
spec@@ 175
tele@@ 175
visu@@ 175
10@@ 174
acting 174
analy@@ 174
demo@@ 174
dep@@ 174
educ@@ 174
extra 174
hr@@ 174
hydro@@ 174
ken 174
published 174
significant 174
trouble 174
calls 173
coffee 173
degrees 173
designers 173
emer@@ 173
mark 173
ours 173
pli@@ 173
q@@ 173
race 173
sin@@ 173
sol@@ 173
sphere 173
tas@@ 173
techni@@ 173
tremendous 173
10,000 172
al-@@ 172
answers 172
california 172
citizens 172
eding 172
sau@@ 172
shel@@ 172
supply 172
ular 172
,@@ 171
a-@@ 171
achie@@ 171
apart 171
atmosphere 171
blind 171
check 171
dence 171
ep 171
party 171
passed 171
worst 171
const@@ 170
counter@@ 170
creates 170
crimin@@ 170
dea@@ 170
etc 170
justice 170
neu@@ 170
pr@@ 170
radio 170
spa@@ 170
thes@@ 170
ambi@@ 169
ards 169
collabor@@ 169
communicate 169
differences 169
fying 169
glob@@ 169
improve 169
mountain 169
notion 169
rock 169
rooms 169
sac@@ 169
sely 169
speci@@ 169
structures 169
suppor@@ 169
xi@@ 169
flies 168
foundation 168
hearing 168
ie@@ 168
noticed 168
oxygen 168
sch@@ 168
stances 168
travel@@ 168
yer 168
accep@@ 167
edge 167
ening 167
gate 167
illu@@ 167
imag@@ 167
lets 167
ority 167
phenomenon 167
repli@@ 167
responsibility 167
richard 167
sla@@ 167
tar@@ 167
1,000 166
197@@ 166
cious 166
ells 166
frequ@@ 166
ko@@ 166
memor@@ 166
organisms 166
sand 166
seemed 166
&apos;@@ 165
asia 165
assem@@ 165
colleagues 165
easily 165
helping 165
lie 165
low-@@ 165
meas@@ 165
mming 165
nations 165
stration 165
work@@ 165
arti@@ 164
bil@@ 164
corner 164
electric 164
farmers 164
feels 164
gui@@ 164
myster@@ 164
possibility 164
religious 164
repe@@ 164
standard 164
studying 164
text 164
tially 164
tle 164
ung@@ 164
vor@@ 164
achieve 163
arb@@ 163
basis 163
condition 163
hes 163
law@@ 163
musli@@ 163
nearly 163
necessarily 163
organi@@ 163
ought 163
particles 163
planets 163
programs 163
stron@@ 163
tissue 163
tory 163
wee@@ 163
algorith@@ 162
consu@@ 162
fix 162
meter 162
organizations 162
painting 162
part@@ 162
roll@@ 162
shift 162
sym@@ 162
window 162
14 161
ables 161
acade@@ 161
ath@@ 161
bran@@ 161
centi@@ 161
corpo@@ 161
dimensional 161
figured 161
flight 161
hair 161
ignor@@ 161
landscape 161
pounds 161
profit 161
pus@@ 161
return 161
sle@@ 161
tab@@ 161
total 161
wei@@ 161
aspe@@ 160
bird 160
ends 160
giant 160
imagination 160
iraq 160
knowing 160
limit@@ 160
mat@@ 160
ne 160
process@@ 160
reduce 160
boat 159
bridge 159
civil 159
communic@@ 159
core 159
diver@@ 159
finished 159
hero@@ 159
highly 159
ink 159
ists 159
lucky 159
neighb@@ 159
ordin@@ 159
rain 159
apo@@ 158
architec@@ 158
attemp@@ 158
choices 158
definition 158
dents 158
direc@@ 158
fair 158
fig@@ 158
flu 158
iled 158
lam@@ 158
necessary 158
nutri@@ 158
ples 158
relationships 158
stopped 158
streets 158
benefit 157
bers 157
conne@@ 157
consum@@ 157
eng@@ 157
engine 157
fication 157
fs 157
gor@@ 157
graph 157
hun@@ 157
identi@@ 157
interact 157
kil@@ 157
mur@@ 157
opportunities 157
plac@@ 157
pose 157
thir@@ 157
1.@@ 156
argument 156
despite 156
differently 156
leads 156
missing 156
mix@@ 156
prison 156
ring 156
tter@@ 156
xes 156
yellow 156
accoun@@ 155
arian 155
bled 155
bone 155
brings 155
designer 155
engage 155
lying 155
mani@@ 155
members 155
organic 155
oth 155
prize 155
professor 155
respect 155
ultimately 155
wan@@ 155
attack 154
effort 154
ily 154
invol@@ 154
ken@@ 154
mini@@ 154
moments 154
moves 154
passionate 154
sites 154
throw 154
adop@@ 153
bt 153
cell@@ 153
cial 153
comfortable 153
compu@@ 153
foreign 153
ina 153
inner 153
join 153
leading 153
mathematics 153
mr. 153
noise 153
pic@@ 153
russi@@ 153
scen@@ 153
symme@@ 153
tail 153
tech 153
visit 153
agriculture 152
benefits 152
bla@@ 152
bread 152
covered 152
custom@@ 152
discovery 152
emotions 152
fairly 152
forever 152
gical 152
journ@@ 152
lesson 152
nel 152
operation 152
puzz@@ 152
ra 152
reve@@ 152
sculp@@ 152
surge@@ 152
wer@@ 152
-year-old 151
antly 151
brilliant 151
coast 151
enter 151
held 151
helps 151
iran 151
ney 151
plo@@ 151
resol@@ 151
tations 151
tom 151
13 150
15@@ 150
ank 150
bility 150
cas@@ 150
cation 150
cide 150
contra@@ 150
defen@@ 150
emplo@@ 150
engineers 150
extreme 150
introdu@@ 150
las@@ 150
mc@@ 150
nar@@ 150
rain@@ 150
saving 150
soli@@ 150
suffering 150
tial 150
tures 150
afraid 149
apply 149
calcul@@ 149
conscious 149
ering 149
expec@@ 149
expla@@ 149
extin@@ 149
fold 149
hei@@ 149
ine@@ 149
jun@@ 149
load 149
logi@@ 149
puts 149
river 149
shares 149
slowly 149
tal@@ 149
typical 149
vor 149
whi@@ 149
wisdom 149
zz@@ 149
adap@@ 148
adults 148
bees 148
billions 148
bling 148
carto@@ 148
cir@@ 148
concent@@ 148
creatures 148
engineer 148
fashion 148
female 148
filled 148
fur@@ 148
gene@@ 148
gradu@@ 148
high@@ 148
instru@@ 148
japan 148
lic@@ 148
matters 148
ologist 148
responsible 148
rou@@ 148
sity 148
stem 148
unt 148
afford 147
cle 147
degree 147
elements 147
facebook 147
fields 147
fighting 147
hum@@ 147
mothers 147
motion 147
mouse 147
negative 147
note 147
quote 147
raised 147
ten 147
wonder@@ 147
1,@@ 146
alize 146
appreci@@ 146
begins 146
calcu@@ 146
capable 146
compar@@ 146
competition 146
constru@@ 146
deser@@ 146
fascinating 146
french 146
ght@@ 146
ior 146
laun@@ 146
reas@@ 146
report 146
san 146
tan 146
thy 146
walls 146
24 145
attac@@ 145
card 145
caught 145
cheap 145
distance 145
easier 145
evol@@ 145
experiences 145
fill 145
hel@@ 145
hopefully 145
influence 145
ried 145
sector 145
station 145
supp@@ 145
titude 145
van@@ 145
vast 145
virtual 145
196@@ 144
contro@@ 144
crime 144
ear 144
gun 144
holding 144
identity 144
leaving 144
legal 144
loss 144
not@@ 144
ong 144
peri@@ 144
profound 144
recei@@ 144
respond 144
see@@ 144
sick 144
statistics 144
traffic 144
wild 144
activ@@ 143
bac@@ 143
block 143
british 143
electro@@ 143
facili@@ 143
heads 143
inno@@ 143
meat 143
modi@@ 143
promise 143
rein@@ 143
simpli@@ 143
virtu@@ 143
base 142
brother 142
colors 142
compe@@ 142
embra@@ 142
enjoy 142
fal@@ 142
gras@@ 142
investment 142
link 142
powered 142
tured 142
vement 142
wide 142
agen@@ 141
breast 141
concep@@ 141
describe 141
desert 141
ep@@ 141
exper@@ 141
ght-@@ 141
gos 141
hat@@ 141
importantly 141
impres@@ 141
kl@@ 141
log@@ 141
magazine 141
mates 141
measu@@ 141
offer 141
otherwise 141
paint 141
shouldn 141
sold 141
speech 141
studied 141
trained 141
allo@@ 140
arms 140
bus@@ 140
campaign 140
cele@@ 140
cham@@ 140
cont@@ 140
dreams 140
dry 140
insects 140
invest 140
invest@@ 140
j 140
kee@@ 140
mov@@ 140
normally 140
occur@@ 140
prof@@ 140
tting 140
400 139
aci@@ 139
aling 139
circle 139
consumption 139
count 139
determin@@ 139
fellow 139
galaxy 139
invisible 139
obs@@ 139
principles 139
sister 139
sudden 139
therapy 139
warming 139
wave 139
beat 138
catch 138
damage 138
economics 138
everyday 138
expres@@ 138
factory 138
happ@@ 138
inci@@ 138
milli@@ 138
molecule 138
placed 138
quie@@ 138
seriously 138
speak@@ 138
steps 138
suit 138
wear 138
civilization 137
dem@@ 137
dolph@@ 137
duc@@ 137
entirely 137
gentle@@ 137
intelligent 137
ishing 137
languages 137
mouth 137
nam@@ 137
operating 137
opposite 137
professional 137
protein 137
rid 137
transform 137
ury 137
17 136
2,000 136
airplane 136
and-@@ 136
bab@@ 136
belief 136
ception 136
compli@@ 136
creation 136
depression 136
events 136
func@@ 136
husband 136
impli@@ 136
lack 136
robo@@ 136
shop 136
sis 136
small@@ 136
spirit 136
spring 136
transpor@@ 136
argue 135
article 135
atta@@ 135
challen@@ 135
concerned 135
deliver 135
desire 135
disco@@ 135
ference 135
fif@@ 135
home@@ 135
in-@@ 135
jud@@ 135
keeping 135
labor 135
lic 135
limited 135
philosop@@ 135
photo 135
plus 135
principle 135
separ@@ 135
stuck 135
ves@@ 135
viruses 135
acceler@@ 134
addi@@ 134
advantage 134
ales 134
background 134
believed 134
cers 134
co2 134
commercial 134
deeply 134
designing 134
hate 134
horri@@ 134
invi@@ 134
jum@@ 134
male 134
managed 134
opened 134
opini@@ 134
pher@@ 134
reser@@ 134
roll 134
spon@@ 134
theater 134
toward 134
wow 134
yesterday 134
arc@@ 133
childhood 133
dynamic 133
end@@ 133
equal 133
evil 133
exhi@@ 133
failed 133
followed 133
increasingly 133
institute 133
intervie@@ 133
ites 133
majority 133
oceans 133
plane 133
predi@@ 133
predict 133
prob@@ 133
satelli@@ 133
th-@@ 133
tom@@ 133
whenever 133
worl@@ 133
apple 132
distribu@@ 132
driven 132
generate 132
habit@@ 132
infin@@ 132
israel 132
kid@@ 132
oli@@ 132
opening 132
pages 132
paul 132
port 132
spaces 132
surprise 132
thinks 132
tomorrow 132
u.@@ 132
versus 132
washington 132
200@@ 131
according 131
charles 131
constantly 131
electrical 131
organized 131
participa@@ 131
perfectly 131
ph 131
posi@@ 131
prototyp@@ 131
rop@@ 131
separate 131
sum 131
val 131
wealth 131
wearing 131
whom 131
approach@@ 130
bar 130
brand 130
church 130
cognitive 130
dom 130
drawing 130
due 130
failure 130
farm 130
fourth 130
gas@@ 130
gation 130
heli@@ 130
mexico 130
monit@@ 130
ories 130
practic@@ 130
prevent 130
rob@@ 130
soil 130
survival 130
tis@@ 130
ty@@ 130
ur 130
wil@@ 130
ace 129
color@@ 129
compare 129
corruption 129
currently 129
define 129
dimensions 129
graduate 129
harder 129
independent 129
match 129
photos 129
sar@@ 129
secre@@ 129
shif@@ 129
subje@@ 129
unless 129
volunte@@ 129
atures 128
blin@@ 128
blu@@ 128
care@@ 128
classroom 128
dies 128
explan@@ 128
finger 128
gan@@ 128
gather@@ 128
hyper@@ 128
jump 128
ka 128
letter 128
metaphor 128
mus@@ 128
ol 128
ordinary 128
producing 128
secon@@ 128
sy 128
transpar@@ 128
tural 128
urs 128
vice 128
affect 127
cans 127
experts 127
galaxies 127
gry 127
interven@@ 127
musi@@ 127
narra@@ 127
optimi@@ 127
partici@@ 127
random 127
seas@@ 127
tumor 127
universal 127
vege@@ 127
voices 127
actor 126
alle@@ 126
ams 126
bles 126
caused 126
cis@@ 126
connec@@ 126
cular 126
depres@@ 126
equivalent 126
ert 126
ery 126
exists 126
friend@@ 126
gain 126
investi@@ 126
invited 126
leadership 126
leaves 126
roman@@ 126
rural 126
sm@@ 126
spot 126
spre@@ 126
succe@@ 126
telescop@@ 126
tough 126
tran@@ 126
treated 126
weird 126
worried 126
artificial 125
compared 125
continent 125
debate 125
di 125
dinner 125
distribution 125
email 125
hur@@ 125
imm@@ 125
ite 125
paying 125
plu@@ 125
proje@@ 125
sensor@@ 125
shapes 125
signal 125
signals 125
sl@@ 125
spac@@ 125
suppose 125
thri@@ 125
tter 125
activi@@ 124
businesses 124
cortex 124
direct 124
einstein 124
entreprene@@ 124
hasn 124
hell 124
hidden 124
holes 124
ii 124
japanese 124
keys 124
layer 124
negoti@@ 124
oned 124
planning 124
progra@@ 124
promis@@ 124
sen 124
toi@@ 124
unding 124
weapons 124
12@@ 123
appear 123
appro@@ 123
camp 123
chap@@ 123
chemicals 123
circum@@ 123
construction 123
copy 123
european 123
gon@@ 123
ish@@ 123
muscle 123
neighborhood 123
represent 123
seat 123
sec@@ 123
shoes 123
thesis 123
threat 123
ts@@ 123
valley 123
vehicle 123
wr@@ 123
bear 122
cloud 122
described 122
dest@@ 122
din@@ 122
expression 122
facts 122
geni@@ 122
gran@@ 122
highest 122
hin@@ 122
ills 122
incre@@ 122
isi@@ 122
lady 122
lunch 122
mag@@ 122
malaria 122
mentioned 122
mortality 122
preser@@ 122
rational 122
red@@ 122
scan@@ 122
strate 122
strategy 122
tam@@ 122
tens 122
transl@@ 122
waves 122
20th 121
abstra@@ 121
alists 121
chemistry 121
collective 121
contr@@ 121
develop@@ 121
dinosaurs 121
embar@@ 121
feelings 121
generations 121
grown 121
heal@@ 121
honest 121
houses 121
names 121
proud 121
technologi@@ 121
ution 121
vote 121
weather 121
acts 120
bed@@ 120
britain 120
characteri@@ 120
christ@@ 120
closed 120
co 120
cure 120
discipl@@ 120
double 120
free@@ 120
ge-@@ 120
int 120
interaction 120
microscop@@ 120
offi@@ 120
ough 120
percei@@ 120
proce@@ 120
qua@@ 120
stands 120
violent 120
wake 120
wea@@ 120
wit@@ 120
worldwide 120
anima@@ 119
appli@@ 119
associated 119
clinical 119
colum@@ 119
emerging 119
forced 119
graph@@ 119
heavy 119
influ@@ 119
jac@@ 119
launched 119
mid@@ 119
minister 119
multiple 119
ple@@ 119
pon@@ 119
stro@@ 119
survi@@ 119
teen@@ 119
zer@@ 119
45 118
ading 118
announ@@ 118
bit@@ 118
canada 118
cer 118
chain 118
emergen@@ 118
ene@@ 118
england 118
fat 118
ham 118
hypo@@ 118
intellectual 118
losing 118
married 118
michael 118
nant 118
oning 118
pes 118
player 118
poor@@ 118
sever@@ 118
shoul@@ 118
stran@@ 118
tain@@ 118
technical 118
army 117
boo@@ 117
broad@@ 117
celebra@@ 117
clou@@ 117
collect 117
consequences 117
coral 117
democratic 117
details 117
dio@@ 117
drink 117
fall@@ 117
fell 117
four@@ 117
garden 117
gold 117
grandmother 117
hall 117
hou@@ 117
interface 117
killing 117
leg 117
library 117
maker 117
molecular 117
nei@@ 117
pet 117
practical 117
rates 117
spectrum 117
union 117
abilities 116
ach 116
avoid 116
awful 116
bright 116
chr@@ 116
conf@@ 116
department 116
detail 116
disaster 116
eleph@@ 116
emotion 116
enjo@@ 116
equipment 116
gal@@ 116
grand 116
homes 116
kan@@ 116
letters 116
movies 116
northern 116
pleasure 116
pre-@@ 116
quali@@ 116
remote 116
resource 116
roughly 116
rus@@ 116
sexual 116
smell 116
steel 116
surprised 116
teeth 116
trials 116
trip 116
va 116
wri@@ 116
ze@@ 116
100,000 115
35 115
ack 115
affected 115
amp 115
appar@@ 115
ba 115
bin@@ 115
brown 115
cially 115
coal 115
condu@@ 115
contact 115
cultures 115
dan 115
ero@@ 115
establi@@ 115
fix@@ 115
importance 115
ize 115
joy 115
leader 115
lec@@ 115
occasi@@ 115
setting 115
sight 115
skelet@@ 115
studio 115
tch 115
users 115
vable 115
accident 114
aring 114
budget 114
controlled 114
dealing 114
elling 114
feedback 114
lessons 114
management 114
meaning@@ 114
motiv@@ 114
phil@@ 114
play@@ 114
reci@@ 114
sad 114
selling 114
shir@@ 114
simul@@ 114
soldiers 114
sty 114
tin 114
tles 114
transformation 114
van 114
wine 114
3,000 113
absolute 113
affec@@ 113
ana 113
bus 113
controll@@ 113
dp 113
entertain@@ 113
essential 113
george 113
hadn 113
insu@@ 113
intui@@ 113
ir 113
james 113
kilometers 113
ly@@ 113
nigeria 113
path@@ 113
pil@@ 113
possibilities 113
prove 113
reaction 113
regular 113
section 113
stac@@ 113
stood 113
visi@@ 113
warm 113
17@@ 112
account 112
ade 112
advan@@ 112
angle 112
australia 112
cards 112
categ@@ 112
chicken 112
de-@@ 112
edu@@ 112
effectively 112
empty 112
finish 112
fossil 112
gling 112
graphic 112
ingu@@ 112
inti@@ 112
kenya 112
lim@@ 112
long-term 112
mod@@ 112
open-@@ 112
partner 112
post-@@ 112
preg@@ 112
productive 112
property 112
researchers 112
ritual 112
rock@@ 112
sele@@ 112
shall 112
sna@@ 112
thers 112
thoughts 112
underneath 112
whereas 112
yle 112
3d 111
adult 111
analysis 111
arrived 111
ember 111
ere 111
gam@@ 111
gul@@ 111
horse 111
illness 111
inning 111
jer@@ 111
metal 111
nervous 111
orders 111
phi@@ 111
pleas@@ 111
ption 111
ras@@ 111
roots 111
smar@@ 111
solved 111
specifically 111
spli@@ 111
suggest 111
zon 111
150 110
addition 110
ath 110
beach 110
by@@ 110
calling 110
civili@@ 110
cross 110
curious 110
daily 110
f-@@ 110
gli@@ 110
gravity 110
honor 110
life@@ 110
magnetic 110
magni@@ 110
makers 110
mathematical 110
mountains 110
ome 110
picked 110
pole 110
prime 110
radical 110
round 110
saved 110
shar@@ 110
sharks 110
sophisti@@ 110
spoke 110
stics 110
sub-@@ 110
sugar 110
transition 110
ug@@ 110
variety 110
wire 110
- 109
99 109
advanced 109
amo@@ 109
art@@ 109
atom@@ 109
atory 109
breath 109
butt@@ 109
clock 109
connections 109
considered 109
definitely 109
demand 109
existence 109
experienced 109
express 109
fail 109
fewer 109
fund 109
gely 109
gift 109
hero 109
intern@@ 109
ison 109
kno@@ 109
miss 109
mix 109
ols 109
organs 109
portra@@ 109
requi@@ 109
scene 109
son@@ 109
sources 109
status 109
suggest@@ 109
suggests 109
thomas 109
valuable 109
wings 109
21@@ 108
architect 108
bine 108
buying 108
characters 108
conduc@@ 108
cour@@ 108
deter@@ 108
diet 108
distin@@ 108
ef@@ 108
eline 108
evolutionary 108
folks 108
goals 108
guar@@ 108
hig@@ 108
invention 108
los 108
od 108
operate 108
privi@@ 108
protection 108
relatively 108
relevant 108
respe@@ 108
spir@@ 108
techniques 108
wra@@ 108
2008 107
aded 107
admini@@ 107
alternative 107
aming 107
ans@@ 107
chri@@ 107
cil 107
cker 107
convince 107
dots 107
efficiency 107
employees 107
frank@@ 107
fresh 107
fundament@@ 107
ight 107
increasing 107
lifetime 107
marine 107
master 107
method 107
newspaper 107
oral 107
phan@@ 107
photographs 107
platform 107
players 107
radiation 107
rene@@ 107
require 107
ressed 107
ric 107
silk 107
target 107
typically 107
unds 107
via 107
vin@@ 107
yl@@ 107
zi@@ 107
195@@ 106
aries 106
arly 106
associ@@ 106
ate@@ 106
awareness 106
axis 106
bush 106
cape 106
coura@@ 106
defined 106
diam@@ 106
epidemic 106
explains 106
flat 106
identify 106
industri@@ 106
islam@@ 106
notes 106
ologi@@ 106
perception 106
prepared 106
scot@@ 106
ships 106
sides 106
spor@@ 106
stable 106
swim 106
testing 106
tt 106
adverti@@ 105
afri@@ 105
atlan@@ 105
bang 105
credit 105
ct@@ 105
darwin 105
factor 105
fail@@ 105
iden@@ 105
ination 105
inse@@ 105
liked 105
mented 105
motor 105
nasa 105
orig@@ 105
osity 105
previous 105
represents 105
restaurant 105
reward 105
sentence 105
serve 105
sets 105
tradi@@ 105
tradition 105
wars 105
winter 105
zone 105
600 104
aled 104
anti-@@ 104
artic@@ 104
astronom@@ 104
aten 104
battery 104
bee@@ 104
boundar@@ 104
breaking 104
brothers 104
bru@@ 104
cents 104
cky 104
ecosystem 104
facing 104
fishing 104
kar@@ 104
kitchen 104
pacific 104
paradig@@ 104
personally 104
primary 104
rect 104
reli@@ 104
roads 104
safety 104
satis@@ 104
teri@@ 104
theme 104
tox@@ 104
ush 104
videos 104
vulnerable 104
accept 103
af@@ 103
berg 103
deeper 103
director 103
dow 103
earth@@ 103
environments 103
hot@@ 103
introduced 103
ished 103
ladies 103
marketing 103
marriage 103
pig@@ 103
planes 103
properties 103
redu@@ 103
risks 103
sett@@ 103
stock 103
twitter 103
ums 103
unts 103
villa@@ 103
visible 103
writer 103
ack@@ 102
appropriate 102
behaviors 102
bia 102
clas@@ 102
confidence 102
convinced 102
craft 102
dogs 102
driver 102
exchange 102
fire@@ 102
flas@@ 102
gap 102
gles 102
govern@@ 102
instrument 102
jan@@ 102
mention 102
nor 102
ord@@ 102
patent 102
processes 102
proteins 102
que@@ 102
senses 102
strength 102
struggle 102
switch 102
tains 102
tane@@ 102
tests 102
trick 102
unlike 102
who@@ 102
ball@@ 101
battle 101
blocks 101
carrying 101
centers 101
collapse 101
cooking 101
crash 101
dent@@ 101
eastern 101
emissions 101
form@@ 101
frame@@ 101
generally 101
germany 101
gest 101
graphi@@ 101
harvard 101
hit@@ 101
kers 101
laptop 101
lay 101
location 101
lock 101
maps 101
mistake 101
naturally 101
paraly@@ 101
plays 101
politicians 101
rare 101
religi@@ 101
replace 101
requires 101
roof 101
sages 101
sending 101
stupid 101
ternal 101
tons 101
tries 101
wikipedia 101
windows 101
wired 101
wondering 101
applied 100
bottle 100
cational 100
chimpanze@@ 100
ckets 100
click 100
components 100
computing 100
coo@@ 100
drin@@ 100
dynam@@ 100
ength 100
faith 100
goods 100
hard@@ 100
isol@@ 100
licen@@ 100
ogra@@ 100
penguins 100
psychology 100
rapi@@ 100
received 100
rup@@ 100
solving 100
stru@@ 100
style 100
trage@@ 100
unusual 100
volu@@ 100
watched 100
acci@@ 99
ancestors 99
ballo@@ 99
broke 99
bubble 99
buil@@ 99
burning 99
cab@@ 99
carefully 99
eff@@ 99
eller 99
five-@@ 99
former 99
frame 99
gressi@@ 99
hits 99
inevi@@ 99
integra@@ 99
intri@@ 99
liquid 99
nat@@ 99
need@@ 99
noon 99
poetry 99
pulled 99
remin@@ 99
sensitive 99
shark 99
strated 99
stry 99
sustain@@ 99
tables 99
trillion 99
u.k. 99
wise 99
-up 98
atoms 98
collaboration 98
consumer 98
ctor 98
curi@@ 98
discussion 98
eco@@ 98
exercise 98
exploration 98
ferti@@ 98
ft@@ 98
gest@@ 98
grain 98
grid 98
ingre@@ 98
lou@@ 98
manage 98
mas 98
member 98
musical 98
novel 98
of-@@ 98
pants 98
percentage 98
pin@@ 98
runs 98
soci@@ 98
string 98
stu@@ 98
than@@ 98
the-@@ 98
thin@@ 98
twi@@ 98
unit 98
verage 98
00@@ 97
arab 97
arri@@ 97
blan@@ 97
brazil 97
contin@@ 97
cutting 97
dam@@ 97
destruction 97
empathy 97
francisco 97
gay 97
gover@@ 97
healthcare 97
hospitals 97
interests 97
l-@@ 97
laboratory 97
laugh@@ 97
males 97
mirror 97
mistakes 97
orche@@ 97
raising 97
rand@@ 97
remem@@ 97
resear@@ 97
ride 97
robert 97
steve 97
stress 97
treat@@ 97
ue 97
wid@@ 97
75 96
ai@@ 96
alist 96
autonom@@ 96
bel 96
burn 96
colli@@ 96
comfort 96
comple@@ 96
contain@@ 96
crow@@ 96
display 96
ili@@ 96
john@@ 96
mira@@ 96
obje@@ 96
onal 96
pollution 96
poten@@ 96
predat@@ 96
reti@@ 96
rus 96
situations 96
temporary 96
tious 96
wheel@@ 96
wher@@ 96
arab@@ 95
arily 95
asing 95
bay 95
behavi@@ 95
bo 95
capture 95
caus@@ 95
crowd 95
dered 95
exam@@ 95
goo@@ 95
hil@@ 95
hotel 95
ids 95
innovative 95
islam 95
medium 95
milk 95
mol@@ 95
mr@@ 95
open@@ 95
peak 95
phenomen@@ 95
piano 95
pop 95
sky@@ 95
southern 95
susta@@ 95
terror@@ 95
ulti@@ 95
virg@@ 95
ami 94
bag 94
cau@@ 94
counter 94
deci@@ 94
element 94
falls 94
fran@@ 94
harv@@ 94
inspiration 94
migra@@ 94
mush@@ 94
nin@@ 94
pack 94
quanti@@ 94
resili@@ 94
ridi@@ 94
sex@@ 94
story@@ 94
tracking 94
upp@@ 94
user 94
youtube 94
0 93
2000 93
2007 93
absor@@ 93
aro@@ 93
aw@@ 93
eland 93
fit@@ 93
hurt 93
inspi@@ 93
mad 93
mand@@ 93
mathemati@@ 93
post@@ 93
quant@@ 93
regul@@ 93
relative 93
sees 93
sir 93
tate 93
tual 93
band 92
ecu@@ 92
integr@@ 92
organ 92
passi@@ 92
sav@@ 92
sor 92
staf@@ 92
stun@@ 92
taste 92
ual 92
yo 92
za@@ 92
ameras 91
birthday 91
blog 91
competi@@ 91
confli@@ 91
dur@@ 91
fascin@@ 91
gress 91
gy@@ 91
hous@@ 91
inf@@ 91
manufacturing 91
pay@@ 91
plans 91
ress 91
spr@@ 91
stand@@ 91
syste@@ 91
tim 91
xide 91
bag@@ 90
c. 90
cast 90
enga@@ 90
flexi@@ 90
institution 90
jam@@ 90
key@@ 90
origin@@ 90
post 90
propor@@ 90
rab@@ 90
recycl@@ 90
six@@ 90
stan@@ 90
swa@@ 90
teams 90
tie 90
toler@@ 90
u.n. 90
ware 90
assi@@ 89
fing@@ 89
ier 89
increas@@ 89
phili@@ 89
phr@@ 89
pollen 89
port@@ 89
simil@@ 89
sper@@ 89
survey 89
tribu@@ 89
water@@ 89
2.@@ 88
astero@@ 88
bet 88
boston 88
court 88
dir@@ 88
gla@@ 88
golden 88
nap@@ 88
pakistan 88
rat@@ 88
stian 88
thin 88
tube 88
2010 87
aug@@ 87
duced 87
fabri@@ 87
fau@@ 87
foc@@ 87
perman@@ 87
restri@@ 87
sal 87
stant 87
ti 87
tili@@ 87
unger 87
web@@ 87
bert 86
bin 86
black@@ 86
certain@@ 86
che 86
discus@@ 86
inje@@ 86
iting 86
king@@ 86
metho@@ 86
opp@@ 86
philosoph@@ 86
proto@@ 86
scrat@@ 86
success@@ 86
tee 86
thou@@ 86
tw@@ 86
venue 86
wes@@ 86
ada@@ 85
atten@@ 85
band@@ 85
copy@@ 85
designs 85
elimin@@ 85
option 85
polio 85
som@@ 85
une 85
.com 84
16@@ 84
21 84
chicago 84
clip 84
compon@@ 84
cool@@ 84
essen@@ 84
haiti 84
less@@ 84
queen 84
sa 84
sahar@@ 84
september 84
sign@@ 84
so-@@ 84
songs 84
strug@@ 84
ya 84
aller@@ 83
anth@@ 83
bacteri@@ 83
budd@@ 83
chil@@ 83
diagra@@ 83
ee@@ 83
elec@@ 83
esses 83
genom@@ 83
inn@@ 83
interpre@@ 83
lifest@@ 83
nose 83
oles@@ 83
partner@@ 83
pharma@@ 83
sand@@ 83
scop@@ 83
trin@@ 83
vehi@@ 83
alt 82
archi@@ 82
automo@@ 82
common@@ 82
curr@@ 82
cyber@@ 82
epi@@ 82
er-@@ 82
films 82
ford 82
gment 82
ing-@@ 82
ium 82
mean@@ 82
navi@@ 82
obama 82
pen 82
tz@@ 82
wand@@ 82
2005 81
ang@@ 81
ania 81
appl@@ 81
ay 81
blog@@ 81
bucks 81
dun@@ 81
entrepr@@ 81
ern 81
fab@@ 81
imple@@ 81
kill@@ 81
lung 81
phase 81
rhyth@@ 81
roo@@ 81
scan 81
spar@@ 81
uns@@ 81
uss 81
ye 81
year-@@ 81
ai 80
ank@@ 80
bat 80
bene@@ 80
chip 80
ela 80
exponenti@@ 80
gates 80
glas@@ 80
hell@@ 80
hood 80
ker@@ 80
manufac@@ 80
mom@@ 80
multi-@@ 80
p-@@ 80
paris 80
tem@@ 80
wis@@ 80
yn@@ 80
you@@ 80
co-@@ 79
gender 79
great@@ 79
input 79
iphone 79
kins 79
ku@@ 79
photo@@ 79
poly@@ 79
repu@@ 79
sequ@@ 79
simpl@@ 79
spin@@ 79
sue 79
symptom@@ 79
trend 79
adi@@ 78
an-@@ 78
angel@@ 78
bun@@ 78
clever 78
dor@@ 78
ethi@@ 78
gps 78
instin@@ 78
kni@@ 78
one@@ 78
organis@@ 78
popu@@ 78
prepar@@ 78
real@@ 78
scho@@ 78
stent 78
surpris@@ 78
14@@ 77
brow@@ 77
crea@@ 77
dh 77
ims 77
interview 77
moder@@ 77
nel@@ 77
partic@@ 77
spra@@ 77
stimul@@ 77
stit@@ 77
2009 76
add@@ 76
clay 76
fan 76
gent 76
journalist 76
ord 76
ous@@ 76
peter 76
refer@@ 76
sci@@ 76
theor@@ 76
uganda 76
uns 76
vulner@@ 76
yn 76
adam 75
ager 75
any@@ 75
arr@@ 75
autis@@ 75
commun@@ 75
dop@@ 75
ever@@ 75
fic@@ 75
hen@@ 75
hunger 75
ket 75
links 75
lot@@ 75
olymp@@ 75
ota 75
partment 75
pyrami@@ 75
regu@@ 75
rich@@ 75
tes@@ 75
tricks 75
umin@@ 75
woo@@ 75
anda 74
bell 74
bi 74
cock@@ 74
collap@@ 74
ern@@ 74
follo@@ 74
frank 74
ki 74
market@@ 74
mili@@ 74
mon 74
orbit 74
prop@@ 74
proper@@ 74
relation 74
ser 74
soft 74
standards 74
texas 74
tour 74
turing 74
vered 74
what@@ 74
zations 74
19 73
amin@@ 73
brief 73
chromo@@ 73
citi@@ 73
indepen@@ 73
interest@@ 73
meetings 73
nest 73
origami 73
pad 73
tag@@ 73
ually 73
vas@@ 73
00 72
ax@@ 72
bol@@ 72
club 72
derek 72
got@@ 72
migr@@ 72
nets 72
sensi@@ 72
tus 72
usual 72
zz 72
attle 71
commer@@ 71
elegan@@ 71
eping 71
experim@@ 71
forma@@ 71
fusion 71
hau@@ 71
illegal 71
ji@@ 71
korea 71
motivation 71
orange 71
pool 71
profession@@ 71
psychiat@@ 71
sage 71
strategi@@ 71
tag 71
willi@@ 71
wol@@ 71
2004 70
27 70
95 70
ald 70
ange@@ 70
aper 70
ben 70
dama@@ 70
defin@@ 70
diabetes 70
dru@@ 70
fam@@ 70
favor@@ 70
gall@@ 70
gery 70
illusion 70
jack 70
les@@ 70
manipu@@ 70
nee 70
net@@ 70
pa 70
retro@@ 70
sent@@ 70
transi@@ 70
22 69
agenda 69
ar-@@ 69
bf 69
bow@@ 69
chaos 69
diplo@@ 69
disc@@ 69
genu@@ 69
long-@@ 69
n-@@ 69
neuron 69
pati@@ 69
rier 69
silicon 69
statisti@@ 69
stly 69
symbol 69
tely 69
thr@@ 69
tis 69
zer 69
agri@@ 68
deep@@ 68
ene 68
eric 68
fel@@ 68
fic 68
film@@ 68
foun@@ 68
gent@@ 68
innova@@ 68
isra@@ 68
janu@@ 68
lege 68
nation@@ 68
ograph@@ 68
plasti@@ 68
ski@@ 68
stanford 68
sty@@ 68
talent 68
usi@@ 68
var@@ 68
65 67
bud@@ 67
deta@@ 67
diff@@ 67
expan@@ 67
ghana 67
golf 67
k-@@ 67
manhattan 67
mess@@ 67
mou@@ 67
ome@@ 67
op 67
oxford 67
requ@@ 67
tiv@@ 67
transforma@@ 67
verse 67
vo 67
194@@ 66
2003 66
anony@@ 66
brie@@ 66
cher@@ 66
distri@@ 66
farmer 66
hang 66
humor 66
martin 66
microsoft 66
olo@@ 66
pan 66
pus 66
sw 66
tery 66
tude 66
vels 66
vy 66
2006 65
bby 65
dialo@@ 65
dig 65
elt 65
fortunately 65
gang 65
ib@@ 65
iel 65
mary 65
mir@@ 65
nes@@ 65
oms 65
oud 65
rely 65
sandwi@@ 65
stors 65
sugge@@ 65
transport 65
univer@@ 65
viet@@ 65
40@@ 64
anthropo@@ 64
athei@@ 64
expen@@ 64
frag@@ 64
harmon@@ 64
juli@@ 64
legi@@ 64
nia 64
super 64
text@@ 64
trau@@ 64
trends 64
ultra@@ 64
zens 64
250 63
alien 63
angeles 63
astro@@ 63
baseball 63
bis@@ 63
class@@ 63
collea@@ 63
dam 63
dau@@ 63
dinosau@@ 63
engagement 63
experiment@@ 63
fe 63
fres@@ 63
gand@@ 63
geno@@ 63
ghter 63
grab@@ 63
gst 63
jon@@ 63
pilot 63
poster 63
questi@@ 63
revol@@ 63
saturn 63
sel 63
sequen@@ 63
stam@@ 63
stere@@ 63
syl@@ 63
trou@@ 63
wa 63
weal@@ 63
wild@@ 63
2001 62
23 62
26 62
32 62
ay@@ 62
bub@@ 62
cambridge 62
democra@@ 62
element@@ 62
enced 62
expedi@@ 62
gan 62
geographic 62
gol@@ 62
hall@@ 62
institu@@ 62
lee 62
listen@@ 62
nai@@ 62
phosp@@ 62
republi@@ 62
sation 62
sion@@ 62
spee@@ 62
vagina 62
ville 62
viol@@ 62
alex@@ 61
alzheimer 61
confi@@ 61
consci@@ 61
danger@@ 61
dia 61
filter 61
gir@@ 61
howard 61
intro@@ 61
may@@ 61
mo 61
moment@@ 61
psycho@@ 61
sey 61
sin 61
skep@@ 61
tz 61
universi@@ 61
analog@@ 60
ance@@ 60
astrop@@ 60
cin 60
ette 60
florida 60
geogra@@ 60
han 60
haw@@ 60
mail 60
og@@ 60
parado@@ 60
pir@@ 60
plat@@ 60
reg@@ 60
stimu@@ 60
tax@@ 60
theore@@ 60
ah@@ 59
andre@@ 59
blogs 59
d. 59
enth@@ 59
glam@@ 59
gut 59
hollywood 59
jes@@ 59
kor@@ 59
lear@@ 59
mm 59
optimis@@ 59
patri@@ 59
pho@@ 59
pon 59
priv@@ 59
rio 59
sport 59
steven 59
tenden@@ 59
whit@@ 59
with@@ 59
25@@ 58
angiogen@@ 58
are@@ 58
chol@@ 58
cise 58
fair@@ 58
h-@@ 58
immedi@@ 58
jo 58
kb 58
kit@@ 58
ko 58
mote 58
mous 58
mption 58
neighbor@@ 58
quot@@ 58
s. 58
syndro@@ 58
verb@@ 58
700 57
800 57
ater 57
boun@@ 57
bronx 57
cel@@ 57
dation 57
decisi@@ 57
fes@@ 57
ices 57
initiative 57
kel@@ 57
lux@@ 57
pump@@ 57
schizophren@@ 57
span@@ 57
tsun@@ 57
tumor@@ 57
za 57
193@@ 56
antibio@@ 56
ardo 56
bak@@ 56
bizar@@ 56
brian 56
choo@@ 56
coll@@ 56
dile@@ 56
ghtly 56
gore 56
henry 56
instal@@ 56
mem@@ 56
minim@@ 56
mode 56
pollu@@ 56
ri 56
temper@@ 56
terrori@@ 56
tony 56
tour@@ 56
transp@@ 56
vil 56
1960 55
abra@@ 55
alli@@ 55
au 55
bedro@@ 55
bli@@ 55
broo@@ 55
cei@@ 55
condi@@ 55
diffic@@ 55
dimension 55
expe@@ 55
explosion 55
glamour 55
gur@@ 55
hai 55
hn@@ 55
hori@@ 55
hus@@ 55
kev@@ 55
kon@@ 55
los@@ 55
medic@@ 55
primi@@ 55
simulation 55
smith 55
tober 55
ala 54
d.@@ 54
differ@@ 54
eness 54
garage 54
hallu@@ 54
hier@@ 54
homo 54
initi@@ 54
intuition 54
ires 54
itali@@ 54
jim 54
kat@@ 54
mammo@@ 54
matri@@ 54
planet@@ 54
q 54
ren 54
restaurants 54
run@@ 54
sop@@ 54
symbo@@ 54
ttle 54
versi@@ 54
veter@@ 54
zu@@ 54
é@@ 54
2,@@ 53
28 53
50@@ 53
85 53
ade@@ 53
ander 53
anderth@@ 53
emp@@ 53
engine@@ 53
immer@@ 53
ind 53
mana@@ 53
mechanis@@ 53
miner@@ 53
sons 53
ss@@ 53
ut 53
zza 53
24@@ 52
bai 52
bei@@ 52
biolog@@ 52
bob 52
experi@@ 52
febru@@ 52
fing 52
geome@@ 52
geor@@ 52
gle 52
inde@@ 52
inging 52
joe 52
kr@@ 52
metaph@@ 52
oxyto@@ 52
profi@@ 52
rs 52
rying 52
ste 52
tale 52
taliban 52
thei@@ 52
therap@@ 52
will@@ 52
wind@@ 52
ale@@ 51
alter@@ 51
ander@@ 51
banglades@@ 51
caf@@ 51
dings 51
hl@@ 51
interpretation 51
invasi@@ 51
ipo@@ 51
leon@@ 51
lincol@@ 51
pid 51
raft 51
rul@@ 51
sche@@ 51
signific@@ 51
stal@@ 51
tanz@@ 51
tel 51
13@@ 50
29 50
att@@ 50
burgh 50
iety 50
individu@@ 50
indu@@ 50
midd@@ 50
phot@@ 50
rb 50
revolution@@ 50
shang@@ 50
streng@@ 50
teach@@ 50
umines@@ 50
venti@@ 50
apri@@ 49
asse@@ 49
aster 49
clear@@ 49
dow@@ 49
dul@@ 49
dung 49
entrop@@ 49
g-@@ 49
hat 49
ht@@ 49
kore@@ 49
nigeri@@ 49
pengu@@ 49
phen 49
quad@@ 49
signi@@ 49
typ@@ 49
vent 49
2011 48
amer@@ 48
ames 48
echn@@ 48
ga 48
lie@@ 48
mich@@ 48
mt 48
ore@@ 48
rat 48
valu@@ 48
w-@@ 48
a. 47
alo@@ 47
ap 47
asy 47
barri@@ 47
bec@@ 47
cess@@ 47
concern@@ 47
dens 47
evi@@ 47
fallen 47
figu@@ 47
gens 47
gras 47
hol 47
impul@@ 47
iness 47
labor@@ 47
magne@@ 47
mark@@ 47
opti@@ 47
pag@@ 47
peop@@ 47
psychop@@ 47
sei@@ 47
sour@@ 47
abo@@ 46
campaig@@ 46
festi@@ 46
landscap@@ 46
laptops 46
lei@@ 46
lief 46
m-@@ 46
mor 46
nis@@ 46
pause 46
prac@@ 46
sten@@ 46
stock@@ 46
tra 46
vel 46
wander@@ 46
120 45
alp@@ 45
avo@@ 45
biot@@ 45
carb@@ 45
ce-@@ 45
doc@@ 45
environ@@ 45
eting 45
finan@@ 45
finger@@ 45
knowle@@ 45
motor@@ 45
nee@@ 45
oll@@ 45
photogra@@ 45
ration@@ 45
read@@ 45
ritu@@ 45
strat@@ 45
tage 45
tier 45
billi@@ 44
cient 44
dient 44
extre@@ 44
gif@@ 44
meta@@ 44
moun@@ 44
num@@ 44
offen@@ 44
previ@@ 44
sim@@ 44
soldi@@ 44
spu@@ 44
ung 44
afgh@@ 43
austr@@ 43
bile 43
chem@@ 43
earli@@ 43
ech@@ 43
gab@@ 43
gil@@ 43
justi@@ 43
libr@@ 43
mach 43
machin@@ 43
mathema@@ 43
popul@@ 43
remark@@ 43
spea@@ 43
substan@@ 43
there@@ 43
yor@@ 43
zon@@ 43
abor@@ 42
alterna@@ 42
anal@@ 42
ban 42
cogni@@ 42
du 42
horizon@@ 42
ich 42
iso@@ 42
jen@@ 42
lap@@ 42
llan@@ 42
pedia 42
rei@@ 42
satur@@ 42
sexu@@ 42
sud@@ 42
vey 42
authenti@@ 41
cum@@ 41
dium 41
enzy@@ 41
espe@@ 41
fashi@@ 41
gie 41
ig 41
inven@@ 41
ision 41
lli@@ 41
lun@@ 41
mam@@ 41
proble@@ 41
seem@@ 41
selves 41
tel@@ 41
tioned 41
utes 41
é 41
ama 40
cess 40
eing 40
en-@@ 40
fest@@ 40
fossi@@ 40
gravi@@ 40
infra@@ 40
ond 40
phic 40
probe 40
program@@ 40
rais@@ 40
sup@@ 40
transplan@@ 40
use@@ 40
wart 40
zin@@ 40
anno@@ 39
anten@@ 39
bank@@ 39
beauti@@ 39
chur@@ 39
ener@@ 39
gel 39
ital 39
know@@ 39
manu@@ 39
nes 39
rot 39
simu@@ 39
stir@@ 39
strate@@ 39
tent@@ 39
unter@@ 39
world@@ 39
bir@@ 38
brand@@ 38
dar 38
enor@@ 38
equi@@ 38
ficial 38
mati@@ 38
met@@ 38
nt 38
oce@@ 38
para@@ 38
perfe@@ 38
prise 38
tu 38
+ 37
aly@@ 37
com 37
cris@@ 37
defini@@ 37
gel@@ 37
gold@@ 37
gues 37
has@@ 37
materi@@ 37
nik 37
nom@@ 37
pathy 37
politi@@ 37
princi@@ 37
rest@@ 37
stin 37
stol@@ 37
stopp@@ 37
ter-@@ 37
emotion@@ 36
ens@@ 36
epide@@ 36
ja 36
ket@@ 36
nie 36
nis 36
ort 36
se-@@ 36
sequences 36
stes 36
ston 36
teenager 36
tty 36
zy 36
alia 35
ann 35
arm@@ 35
beh@@ 35
dol@@ 35
implan@@ 35
inger 35
kn@@ 35
mber 35
norden 35
profess@@ 35
py@@ 35
scienti@@ 35
soc@@ 35
stabili@@ 35
vir@@ 35
agi@@ 34
ause 34
brilli@@ 34
convin@@ 34
deb@@ 34
homo@@ 34
ins@@ 34
kal@@ 34
mails 34
mobili@@ 34
responsi@@ 34
rt 34
sam 34
sands 34
stein 34
tiger 34
vid 34
vul@@ 34
well@@ 34
appropri@@ 33
chemi@@ 33
dden 33
eil 33
eth 33
exer@@ 33
fest 33
kol@@ 33
laden 33
lan 33
lied 33
pau@@ 33
phy@@ 33
ross 33
stan 33
tali@@ 33
tech@@ 33
aus@@ 32
beha@@ 32
belo@@ 32
fically 32
grow@@ 32
ire 32
itely 32
ony@@ 32
quick@@ 32
rie@@ 32
scap@@ 32
ve-@@ 32
von 32
west@@ 32
actu@@ 31
adul@@ 31
beg@@ 31
beginn@@ 31
issu@@ 31
ler@@ 31
mann 31
melt 31
resul@@ 31
seri@@ 31
strand 31
suc@@ 31
unity 31
usa 31
xic@@ 31
ang 30
atmosp@@ 30
chron@@ 30
ctly 30
effici@@ 30
figh@@ 30
halt 30
hir@@ 30
mach@@ 30
mau@@ 30
mexi@@ 30
ollywood 30
vat@@ 30
volun@@ 30
astron@@ 29
bilities 29
easi@@ 29
gala@@ 29
integri@@ 29
sie@@ 29
sms 29
tages 29
tedx@@ 29
through@@ 29
unter 29
yel@@ 29
anthro@@ 28
bang@@ 28
bet@@ 28
electri@@ 28
energi@@ 28
garten 28
hen 28
hospit@@ 28
hundre@@ 28
inge 28
kei@@ 28
kilometer 28
maga@@ 28
mers 28
muse@@ 28
nas@@ 28
nett 28
notic@@ 28
ousness 28
passion@@ 28
perspe@@ 28
tish 28
tte 28
zen@@ 28
brazi@@ 27
child@@ 27
die@@ 27
exist@@ 27
kra@@ 27
natur@@ 27
tradition@@ 27
traff@@ 27
tren@@ 27
vili@@ 27
watt 27
wen@@ 27
ada 26
busin@@ 26
computer@@ 26
dee@@ 26
doll@@ 26
ein@@ 26
eit 26
frie@@ 26
hiv-@@ 26
hn 26
jung@@ 26
kinder@@ 26
las 26
mama 26
marke@@ 26
nega@@ 26
paki@@ 26
sie 26
standar@@ 26
stell@@ 26
wom@@ 26
zine 26
bron@@ 25
del 25
dn@@ 25
freu@@ 25
gement 25
gigan@@ 25
infor@@ 25
lage 25
massi@@ 25
mmer 25
ques 25
shou@@ 25
soft@@ 25
sten 25
stim@@ 25
sug@@ 25
us-@@ 25
v-@@ 25
valent 25
vil@@ 25
aner 24
block@@ 24
capac@@ 24
chs 24
cker@@ 24
enz@@ 24
gar 24
inte@@ 24
oly@@ 24
perfor@@ 24
pers@@ 24
psy@@ 24
recy@@ 24
relev@@ 24
tops 24
tot@@ 24
accor@@ 23
bare 23
bibli@@ 23
big@@ 23
das 23
deca@@ 23
effec@@ 23
eig@@ 23
fort 23
gat@@ 23
inner@@ 23
intelli@@ 23
ira@@ 23
jour@@ 23
nah 23
rd 23
ssi@@ 23
stati@@ 23
urban@@ 23
2-@@ 22
ab 22
anim@@ 22
bot 22
chin@@ 22
elli@@ 22
euro@@ 22
fas@@ 22
grou@@ 22
intellec@@ 22
len 22
marri@@ 22
performan@@ 22
presi@@ 22
rief 22
sach@@ 22
sear@@ 22
socie@@ 22
tality 22
toll 22
tremend@@ 22
á@@ 22
allen 21
aller 21
alls 21
alter 21
americ@@ 21
atur@@ 21
awar@@ 21
boot 21
elle 21
europa 21
evolution@@ 21
git@@ 21
hung 21
iti 21
nie@@ 21
ough@@ 21
phen@@ 21
poe@@ 21
spiritu@@ 21
sth@@ 21
stin@@ 21
symp@@ 21
technolog@@ 21
tempor@@ 21
aus 20
avail@@ 20
benef@@ 20
call@@ 20
chers 20
das@@ 20
digit@@ 20
emis@@ 20
employe@@ 20
ffer 20
kam@@ 20
kle 20
kur@@ 20
let@@ 20
mista@@ 20
patter@@ 20
pian@@ 20
rant 20
vag@@ 20
vail@@ 20
atz 19
bili@@ 19
cals 19
energ@@ 19
europe@@ 19
famili@@ 19
imp@@ 19
je 19
k. 19
kab@@ 19
kir@@ 19
lem 19
osau@@ 19
oxy@@ 19
rin@@ 19
sat@@ 19
trilli@@ 19
tten 19
vide@@ 19
ein 18
eins 18
foreig@@ 18
hri@@ 18
internation@@ 18
lang@@ 18
maj@@ 18
milit@@ 18
ox@@ 18
pel 18
pie@@ 18
ppe 18
rand 18
ruption 18
zar@@ 18
aler 17
anders 17
bart 17
birth@@ 17
complic@@ 17
extrem@@ 17
fort@@ 17
handy 17
intelle@@ 17
kamen 17
kay 17
ks@@ 17
meer 17
mond 17
other@@ 17
professi@@ 17
tea@@ 17
tie@@ 17
un 17
wiki@@ 17
witz 17
won@@ 17
) 16
bitten 16
comfort@@ 16
deu@@ 16
efully 16
eri@@ 16
ests 16
eur@@ 16
gend 16
geria 16
klein 16
mali@@ 16
parti@@ 16
resour@@ 16
ring@@ 16
solu@@ 16
stop@@ 16
zur@@ 16
auto 15
bau@@ 15
bren@@ 15
cke 15
cule 15
fahr@@ 15
ffe 15
glas 15
hab 15
hr 15
ille 15
informa@@ 15
kap@@ 15
kt 15
lang 15
leu@@ 15
lich@@ 15
mee 15
miss@@ 15
posite 15
prot@@ 15
rhy@@ 15
simp@@ 15
situ@@ 15
tern@@ 15
where@@ 15
% 14
000 14
aut 14
b. 14
cken@@ 14
derer 14
diab@@ 14
ellen 14
enheit 14
esse 14
fern@@ 14
geri@@ 14
goog@@ 14
kri@@ 14
nte 14
ould 14
sein 14
train@@ 14
wu@@ 14
@ 13
affe@@ 13
alt@@ 13
atem@@ 13
bald 13
chen 13
dies@@ 13
egal 13
engli@@ 13
event@@ 13
fei@@ 13
grad 13
him@@ 13
ik 13
invisi@@ 13
klu@@ 13
lagen 13
ogen@@ 13
organ@@ 13
pagne 13
phar@@ 13
pover@@ 13
safe@@ 13
schil@@ 13
schwarz@@ 13
stero@@ 13
studi@@ 13
tivi@@ 13
unbe@@ 13
vern@@ 13
weapon@@ 13
weib@@ 13
zy@@ 13
– 13
… 13
# 12
astern 12
autos 12
beri@@ 12
betra@@ 12
chro@@ 12
dit 12
ek@@ 12
exac@@ 12
feed@@ 12
fren@@ 12
gei@@ 12
intensi@@ 12
kli@@ 12
km 12
kro@@ 12
kurz@@ 12
leb@@ 12
omen 12
sch 12
stom@@ 12
weil 12
wick@@ 12
í@@ 12
.b. 11
aden 11
alg@@ 11
bis 11
britan@@ 11
cken 11
curity 11
dab@@ 11
desig@@ 11
dimension@@ 11
dn 11
ffe@@ 11
heim 11
isla@@ 11
kla@@ 11
meister 11
mus 11
ok@@ 11
olog@@ 11
reme@@ 11
schwi@@ 11
strom 11
ted-@@ 11
tier@@ 11
tol@@ 11
ó@@ 11
= 10
dem 10
dise@@ 10
eine 10
fanta@@ 10
fiel@@ 10
herr@@ 10
hmen 10
intu@@ 10
kind@@ 10
mexic@@ 10
normal@@ 10
pro 10
rough@@ 10
spit@@ 10
stab@@ 10
stark 10
stige 10
telev@@ 10
terr@@ 10
toll@@ 10
w. 10
abili@@ 9
feld 9
fen@@ 9
feu@@ 9
geist 9
ges@@ 9
gren@@ 9
ith 9
kinder 9
klei@@ 9
liche 9
mei@@ 9
mir 9
mole@@ 9
nerv@@ 9
norm@@ 9
paci@@ 9
rad@@ 9
still@@ 9
stung 9
tex 9
two@@ 9
u-@@ 9
wollen 9
wur@@ 9
zeit@@ 9
zu 9
è@@ 9
( 8
auge 8
cept 8
chen@@ 8
chir@@ 8
compan@@ 8
erer 8
gend@@ 8
hl 8
hm@@ 8
hoff@@ 8
instit@@ 8
kas 8
kel 8
kle@@ 8
meth@@ 8
muster 8
pf@@ 8
privat@@ 8
rau@@ 8
rem 8
sche 8
schul@@ 8
schwar@@ 8
sophi@@ 8
stein@@ 8
stern 8
stud@@ 8
til 8
vier 8
atten 7
beau@@ 7
best@@ 7
bie@@ 7
brot 7
buch@@ 7
diag@@ 7
eis@@ 7
ender 7
famil@@ 7
fen 7
funk@@ 7
gni@@ 7
gyp@@ 7
ih@@ 7
kun@@ 7
kus@@ 7
lag 7
masse 7
mutter@@ 7
natu@@ 7
oren 7
ote 7
percent@@ 7
rad 7
scha@@ 7
schen 7
slow@@ 7
spen@@ 7
stens 7
stur@@ 7
sung 7
tei@@ 7
uten 7
verti@@ 7
your@@ 7
^ 6
_ 6
angi@@ 6
brau@@ 6
cht 6
cht@@ 6
chter 6
den-@@ 6
dir 6
ende 6
eren 6
face@@ 6
feel@@ 6
frei@@ 6
geb@@ 6
gele@@ 6
gem 6
gs@@ 6
haus@@ 6
inn 6
job@@ 6
kapu@@ 6
lager 6
ld 6
lle 6
malari@@ 6
mel 6
nach@@ 6
nun 6
pment 6
raid 6
reich 6
schnei@@ 6
sich@@ 6
spiel@@ 6
thom@@ 6
tice 6
tig@@ 6
tod 6
tung 6
vices 6
wen 6
wie@@ 6
aber 5
att 5
cisco 5
degre@@ 5
emo@@ 5
ffen 5
health@@ 5
industr@@ 5
ings@@ 5
kleiner 5
kraft 5
kul@@ 5
langu@@ 5
lik@@ 5
mme 5
n. 5
neur@@ 5
prei@@ 5
protot@@ 5
quas@@ 5
ries@@ 5
rö@@ 5
samer 5
sinn@@ 5
solar@@ 5
stab 5
stad@@ 5
stead 5
steu@@ 5
stif@@ 5
tau@@ 5
techn@@ 5
tete 5
them@@ 5
trie@@ 5
ully 5
wand 5
zent@@ 5
ã@@ 5
acht 4
angst 4
auff@@ 4
baum@@ 4
blas@@ 4
califor@@ 4
chines@@ 4
dass 4
disci@@ 4
doch 4
econ@@ 4
ehrlich 4
ele 4
ente 4
erin 4
ernst 4
etes 4
etz 4
flei@@ 4
fore 4
ften 4
hast 4
haus 4
heu@@ 4
insel 4
kern@@ 4
klas@@ 4
koll@@ 4
kom@@ 4
kop@@ 4
kre@@ 4
kt@@ 4
kung 4
kunst@@ 4
minde@@ 4
mitten 4
mund 4
nen 4
omen@@ 4
pf 4
pite 4
silic@@ 4
tem 4
tet 4
wagen 4
ween 4
wein@@ 4
zig 4
zit@@ 4
ç@@ 4
ê@@ 4
í 4
อ@@ 4
* 3
absol@@ 3
aga@@ 3
ameri@@ 3
auf 3
berg@@ 3
besser 3
brei@@ 3
bs@@ 3
complex@@ 3
det 3
det@@ 3
dok@@ 3
drin 3
eben 3
eler@@ 3
enz 3
every@@ 3
expon@@ 3
felder 3
fert 3
fisch@@ 3
gebra@@ 3
gegen@@ 3
genug 3
glau@@ 3
goti@@ 3
gross@@ 3
halten@@ 3
happen@@ 3
hart 3
hing@@ 3
ien 3
intelligen@@ 3
internet@@ 3
isch 3
klo@@ 3
kog@@ 3
ktor 3
lich 3
lige 3
liqu@@ 3
mend@@ 3
mie 3
mier@@ 3
mobil@@ 3
nah@@ 3
nein 3
nst 3
ob 3
ober@@ 3
onie 3
opport@@ 3
orten 3
rami@@ 3
repar@@ 3
scher 3
schi@@ 3
schizop@@ 3
schle@@ 3
schwa@@ 3
schwei@@ 3
seine 3
sep@@ 3
ske@@ 3
spiegel 3
stil 3
strateg@@ 3
tat 3
tern 3
teu@@ 3
toge@@ 3
toile@@ 3
tun 3
uner@@ 3
video@@ 3
viron@@ 3
wald 3
yester@@ 3
zep@@ 3
zog 3
zop@@ 3
 3
 3
â 3
ñ@@ 3
ö@@ 3
abend 2
absolu@@ 2
alles 2
atur 2
aum 2
bein@@ 2
bele@@ 2
blatt 2
brenn@@ 2
casi@@ 2
chti@@ 2
dership 2
destru@@ 2
dorf 2
eben@@ 2
eigen@@ 2
einem 2
ement@@ 2
entre@@ 2
erde 2
essen 2
fft 2
freude 2
fs@@ 2
für 2
ganz 2
geld@@ 2
gung 2
herr 2
hier 2
hin 2
hinder@@ 2
hinter@@ 2
hle 2
holt 2
ige 2
iger 2
immer 2
incredi@@ 2
kapital 2
kilome@@ 2
kran@@ 2
kus 2
lange 2
langer 2
lauf@@ 2
laut 2
leiter 2
lern@@ 2
licht@@ 2
meet@@ 2
mensch 2
merk@@ 2
micha@@ 2
mie@@ 2
mitt@@ 2
nen@@ 2
ost@@ 2
possi@@ 2
programme 2
prü@@ 2
pä@@ 2
reich@@ 2
relation@@ 2
roh@@ 2
rote 2
schlei@@ 2
schmu@@ 2
schn@@ 2
schu@@ 2
smit@@ 2
spie@@ 2
spiel 2
spru@@ 2
sse 2
stag 2
stern@@ 2
sz@@ 2
trie 2
tsch@@ 2
ult 2
verk@@ 2
vier@@ 2
vog@@ 2
waff@@ 2
wie 2
wird 2
zei@@ 2
zir@@ 2
zt 2
zwei@@ 2
£ 2
² 2
à 2
ä@@ 2
ø@@ 2
ü@@ 2
ā@@ 2
ร 2
่ 2
.. 1
.000 1
\ 1
abli@@ 1
aku@@ 1
alen 1
allgemeinen 1
anz 1
asse 1
auf@@ 1
autor@@ 1
bei 1
bein 1
blau 1
bras@@ 1
brasili@@ 1
cen 1
charac@@ 1
chic@@ 1
childr@@ 1
chten@@ 1
dank 1
debat@@ 1
denly 1
desto 1
deut@@ 1
devel@@ 1
diesel@@ 1
dopp@@ 1
druck 1
durch 1
echt 1
effi@@ 1
ei 1
eigent@@ 1
elles 1
eln 1
engl@@ 1
ertes 1
feuer@@ 1
ffee 1
fisch 1
flori@@ 1
frei 1
fte 1
gab 1
gabe 1
gedanken 1
gem@@ 1
gere@@ 1
geru@@ 1
gerä@@ 1
geschü@@ 1
gott 1
guten 1
gö@@ 1
habe 1
haft 1
haut 1
heim@@ 1
herz 1
hie@@ 1
hlen@@ 1
holz@@ 1
hosp@@ 1
hren@@ 1
idee 1
ier@@ 1
ingen 1
internationale 1
ische 1
japan@@ 1
kam 1
kampf 1
kauf@@ 1
keiten 1
kenn@@ 1
kern 1
kolle@@ 1
konz@@ 1
krieg 1
ktu@@ 1
kunst 1
kö@@ 1
lebe@@ 1
legen 1
lichen 1
liches 1
lig 1
llen 1
lok@@ 1
lö@@ 1
mals 1
manhat@@ 1
mathe@@ 1
maus 1
mehr@@ 1
mein 1
mein@@ 1
mensch@@ 1
minister@@ 1
moral@@ 1
morgen 1
movi@@ 1
mut 1
mä@@ 1
möglich 1
national@@ 1
neue 1
nung 1
obvi@@ 1
olly@@ 1
onen 1
online-@@ 1
othe@@ 1
politik 1
rants 1
rech@@ 1
recht@@ 1
rede 1
regel@@ 1
regen 1
regen@@ 1
rett@@ 1
risi@@ 1
robot@@ 1
schaf@@ 1
schau@@ 1
schen@@ 1
schl@@ 1
schluss 1
schnell 1
schwe@@ 1
sei 1
sohn 1
spezi@@ 1
ssen 1
sst 1
stie@@ 1
sweise 1
sä@@ 1
tere 1
thema 1
tot 1
toten 1
trum 1
tsam 1
tur 1
tze 1
tzen 1
tzt 1
unities 1
uss@@ 1
verdi@@ 1
viel@@ 1
von@@ 1
wech@@ 1
weg@@ 1
wege 1
welche 1
welle 1
welt 1
wider@@ 1
wies@@ 1
windo@@ 1
wirkungen 1
wo 1
wurz@@ 1
wus@@ 1
zel@@ 1
zell@@ 1
zelle 1
zielen 1
zin 1
zun@@ 1
zur 1
zw@@ 1
zwe@@ 1
â@@ 1
è 1
ë@@ 1
ï@@ 1
ô@@ 1
ön@@ 1
ú@@ 1
über@@ 1
ă@@ 1
ć 1
ē 1
ť 1
ย 1
ย@@ 1
€ 1
你@@ 1
葱 1
送@@ 1
