# Supplementary material
Source: ML conference proceedings conference paper supplement (https://proceedings.neurips.cc/paper_files/paper/2022/hash/0f5fcf4bff73a3537e0813a38f0d3f76-Abstract.html)
Supplement: Supplementary file 1 [file 0f5fcf4bff73a3537e0813a38f0d3f76-Supplemental-Conference.zip › supplemental/fairseq/data-bin/iwslt14.tokenized.de-en/preprocess.log]

Namespace(align_suffix=None, alignfile=None, all_gather_list_size=16384, amp=False, amp_batch_retries=2, amp_init_scale=128, amp_scale_window=None, azureml_logging=False, bf16=False, bpe=None, cpu=False, criterion='cross_entropy', dataset_impl='mmap', destdir='data-bin/iwslt14.tokenized.de-en', dict_only=False, empty_cache_freq=0, fp16=False, fp16_init_scale=128, fp16_no_flatten_grads=False, fp16_scale_tolerance=0.0, fp16_scale_window=None, joined_dictionary=False, log_file=None, log_format=None, log_interval=100, lr_scheduler='fixed', memory_efficient_bf16=False, memory_efficient_fp16=False, min_loss_scale=0.0001, model_parallel_size=1, no_progress_bar=False, nwordssrc=-1, nwordstgt=-1, on_cpu_convert_precision=False, only_source=False, optimizer=None, padding_factor=8, plasma_path='/tmp/plasma', profile=False, quantization_config_path=None, reset_logging=False, scoring='bleu', seed=1, simul_type=None, source_lang='de', srcdict=None, suppress_crashes=False, target_lang='en', task='translation', tensorboard_logdir=None, testpref='iwslt14.tokenized.de-en/test', tgtdict=None, threshold_loss_scale=None, thresholdsrc=0, thresholdtgt=0, tokenizer=None, tpu=False, trainpref='iwslt14.tokenized.de-en/train', use_plasma_view=False, user_dir=None, validpref='iwslt14.tokenized.de-en/valid', wandb_project=None, workers=20)
[de] Dictionary: 8848 types
[de] iwslt14.tokenized.de-en/train.de: 160239 sents, 4035591 tokens, 0.0% replaced (by <unk>)
[de] Dictionary: 8848 types
[de] iwslt14.tokenized.de-en/valid.de: 7283 sents, 182592 tokens, 0.0192% replaced (by <unk>)
[de] Dictionary: 8848 types
[de] iwslt14.tokenized.de-en/test.de: 6750 sents, 161838 tokens, 0.0636% replaced (by <unk>)
[en] Dictionary: 6632 types
[en] iwslt14.tokenized.de-en/train.en: 160239 sents, 3949114 tokens, 0.0% replaced (by <unk>)
[en] Dictionary: 6632 types
[en] iwslt14.tokenized.de-en/valid.en: 7283 sents, 178622 tokens, 0.00448% replaced (by <unk>)
[en] Dictionary: 6632 types
[en] iwslt14.tokenized.de-en/test.en: 6750 sents, 156928 tokens, 0.00892% replaced (by <unk>)
Wrote preprocessed data to data-bin/iwslt14.tokenized.de-en
