# Supplementary material
Source: ML conference proceedings conference paper supplement (https://proceedings.neurips.cc/paper_files/paper/2022/hash/0f5fcf4bff73a3537e0813a38f0d3f76-Abstract.html)
Supplement: Supplementary file 1 [file 0f5fcf4bff73a3537e0813a38f0d3f76-Supplemental-Conference.zip › supplemental/fairseq/fairseq/.circleci/config.yml]

# Use 2.1 for orbs
version: 2.1

# -------------------------------------------------------------------------------------
# Environments to run the jobs in
# -------------------------------------------------------------------------------------
gpu: &gpu
  environment:
    CUDA_VERSION: "11.1"
  machine:
    image: ubuntu-1604-cuda-11.1:202012-01
  resource_class: gpu.nvidia.medium.multi


# -------------------------------------------------------------------------------------
# Re-usable commands
# -------------------------------------------------------------------------------------
cache_key: &cache_key cache-key-{{ .Environment.CIRCLE_JOB }}-{{ checksum ".circleci/config.yml" }}-{{ checksum "setup.py"}}

install_dep_common: &install_dep_common
  - run:
      name: Install Common Dependencies
      command: |
        source activate fairseq
        pip install --upgrade setuptools
        pip install bitarray boto3 deepspeed editdistance fastBPE iopath ipdb ipython pyarrow pytest sacremoses sentencepiece subword-nmt hydra-core==1.0.7 omegaconf==2.0.6
        pip install --progress-bar off pytest
        pip install --progress-bar off fairscale
        pip install -i https://test.pypi.org/simple/ bitsandbytes-cuda111 -U
        python -c 'import torch; print("Torch version:", torch.__version__)'
        python -m torch.utils.collect_env

install_dep_fused_ops: &install_dep_fused_ops
  - run:
      name: Install Megatron/Apex Dependencies
      working_directory: ~/
      command: |
        source activate fairseq
        git clone https://github.com/NVIDIA/apex
        cd apex
        git checkout e2083df5eb96643c61613b9df48dd4eea6b07690
        pip install -v --no-cache-dir --global-option="--cpp_ext" --global-option="--cuda_ext" --global-option="--deprecated_fused_adam" --global-option="--xentropy" --global-option="--fast_multihead_attn" ./
        cd ~/
        git clone --depth=1 --branch v2.4 https://github.com/NVIDIA/Megatron-LM.git
        cd Megatron-LM
        pip install -e .


install_dep_pt19: &install_dep_pt19
  - run:
      name: Install Pytorch Dependencies
      command: |
        source activate fairseq
        pip install --upgrade setuptools
        pip install torch==1.9.1+cu111 torchvision==0.10.1+cu111 torchaudio==0.9.1 -f https://download.pytorch.org/whl/torch_stable.html
        python -c 'import torch; print("Torch version:", torch.__version__)'

install_dep_pt18: &install_dep_pt18
  - run:
      name: Install Pytorch Dependencies
      command: |
        source activate fairseq
        pip install --upgrade setuptools
        pip install torch==1.8.1+cu111 torchvision==0.9.1+cu111 torchaudio==0.8.1 -f https://download.pytorch.org/whl/torch_stable.html
        python -c 'import torch; print("Torch version:", torch.__version__)'

install_repo: &install_repo
  - run:
      name: Install Repository
      command: |
        source activate fairseq
        pip install .
        python setup.py build_ext --inplace

run_unittests: &run_unittests
  - run:
      name: Run Unit Tests
      command: |
        source activate fairseq
        pytest tests/gpu/test_binaries_gpu.py

check_nvidia_driver: &check_nvidia_driver
  - run:
      name: Check NVIDIA Driver
      working_directory: ~/
      command: |
        pyenv versions
        nvidia-smi

create_conda_env: &create_conda_env
  - run:
      name: Install and Create Conda Environment
      command: |
        curl -o ~/miniconda.sh -O  https://repo.anaconda.com/miniconda/Miniconda3-latest-Linux-x86_64.sh
        chmod +x ~/miniconda.sh
        ~/miniconda.sh -b -p $HOME/miniconda
        rm ~/miniconda.sh
        echo 'export PATH=$HOME/miniconda/bin:$PATH' >> $BASH_ENV
        source $BASH_ENV
        if [ ! -d ~/miniconda/envs/fairseq ]
        then
          conda create -y -n fairseq python=3.8
        fi
        source activate fairseq
        python --version
        pip install --upgrade pip
# -------------------------------------------------------------------------------------
# Jobs to run
# -------------------------------------------------------------------------------------

jobs:
  gpu_tests_pt19:
    <<: *gpu

    working_directory: ~/fairseq-py

    steps:
      - checkout
      - <<: *check_nvidia_driver
      - <<: *create_conda_env
      - restore_cache:
          key: *cache_key
      - <<: *install_dep_pt19
      - <<: *install_dep_common
      - <<: *install_dep_fused_ops
      - save_cache:
          paths:
            - ~/miniconda/
          key: *cache_key
      - <<: *install_repo
      - <<: *run_unittests

  gpu_tests_pt18:
    <<: *gpu

    working_directory: ~/fairseq-py

    steps:
      - checkout
      - <<: *check_nvidia_driver
      - <<: *create_conda_env
      - restore_cache:
          key: *cache_key
      - <<: *install_dep_pt18
      - <<: *install_dep_common
      - <<: *install_dep_fused_ops
      - save_cache:
          paths:
            - ~/miniconda/
          key: *cache_key
      - <<: *install_repo
      - <<: *run_unittests

workflows:
  version: 2
  build:
    jobs:
      - gpu_tests_pt18
      - gpu_tests_pt19
