# Supplementary material
Source: ML conference proceedings conference paper supplement (https://proceedings.neurips.cc/paper_files/paper/2022/hash/0f5fcf4bff73a3537e0813a38f0d3f76-Abstract.html)
Supplement: Supplementary file 1 [file 0f5fcf4bff73a3537e0813a38f0d3f76-Supplemental-Conference.zip › supplemental/fairseq/fairseq/fairseq.egg-info/entry_points.txt]

[console_scripts]
fairseq-eval-lm = fairseq_cli.eval_lm:cli_main
fairseq-generate = fairseq_cli.generate:cli_main
fairseq-hydra-train = fairseq_cli.hydra_train:cli_main
fairseq-interactive = fairseq_cli.interactive:cli_main
fairseq-preprocess = fairseq_cli.preprocess:cli_main
fairseq-score = fairseq_cli.score:cli_main
fairseq-train = fairseq_cli.train:cli_main
fairseq-validate = fairseq_cli.validate:cli_main
