# Supplementary material
Source: ML conference proceedings conference paper supplement (https://proceedings.neurips.cc/paper_files/paper/2022/hash/0f5fcf4bff73a3537e0813a38f0d3f76-Abstract.html)
Supplement: Supplementary file 1 [file 0f5fcf4bff73a3537e0813a38f0d3f76-Supplemental-Conference.zip › supplemental/fairseq/fairseq/fairseq.egg-info/requires.txt]

cffi
cython
hydra-core<1.1,>=1.0.7
omegaconf<2.1
regex
sacrebleu>=1.4.12
torch
tqdm
bitarray
torchaudio>=0.8.0

[:python_version < "3.7"]
dataclasses
numpy<1.20.0

[:python_version >= "3.7"]
numpy
