# Supplementary material
Source: ML conference proceedings conference paper supplement (https://proceedings.neurips.cc/paper_files/paper/2022/hash/0f5fcf4bff73a3537e0813a38f0d3f76-Abstract.html)
Supplement: Supplementary file 1 [file 0f5fcf4bff73a3537e0813a38f0d3f76-Supplemental-Conference.zip › supplemental/fairseq/fairseq/fairseq/benchmark/dummy_lm.py]

# Copyright (c) Facebook, Inc. and its affiliates.
#
# This source code is licensed under the MIT license found in the
# LICENSE file in the root directory of this source tree.

import logging
from dataclasses import dataclass, field
from typing import Optional

import torch
from .dummy_dataset import DummyDataset
from fairseq.data import Dictionary
from fairseq.dataclass import FairseqDataclass
from fairseq.tasks import FairseqTask, register_task
from omegaconf import II


logger = logging.getLogger(__name__)


@dataclass
class DummyLMConfig(FairseqDataclass):
    dict_size: int = 49996
    dataset_size: int = 100000
    tokens_per_sample: int = field(
        default=512, metadata={"help": "max sequence length"}
    )
    add_bos_token: bool = False
    batch_size: Optional[int] = II("dataset.batch_size")
    max_tokens: Optional[int] = II("dataset.max_tokens")
    max_target_positions: int = II("task.tokens_per_sample")


@register_task("dummy_lm", dataclass=DummyLMConfig)
class DummyLMTask(FairseqTask):
    def __init__(self, cfg: DummyLMConfig):
        super().__init__(cfg)

        # load dictionary
        self.dictionary = Dictionary()
        for i in range(cfg.dict_size):
            self.dictionary.add_symbol("word{}".format(i))
        self.dictionary.pad_to_multiple_(8)  # often faster if divisible by 8
        logger.info("dictionary: {} types".format(len(self.dictionary)))

        seq = torch.arange(cfg.tokens_per_sample + 1) + self.dictionary.pad() + 1

        self.dummy_src = seq[:-1]
        self.dummy_tgt = seq[1:]

    def load_dataset(self, split, epoch=1, combine=False, **kwargs):
        """Load a given dataset split.
        Args:
            split (str): name of the split (e.g., train, valid, test)
        """
        if self.cfg.batch_size is not None:
            bsz = self.cfg.batch_size
        else:
            bsz = max(1, self.cfg.max_tokens // self.cfg.tokens_per_sample)
        self.datasets[split] = DummyDataset(
            {
                "id": 1,
                "net_input": {
                    "src_tokens": torch.stack([self.dummy_src for _ in range(bsz)]),
                    "src_lengths": torch.full(
                        (bsz,), self.cfg.tokens_per_sample, dtype=torch.long
                    ),
                },
                "target": torch.stack([self.dummy_tgt for _ in range(bsz)]),
                "nsentences": bsz,
                "ntokens": bsz * self.cfg.tokens_per_sample,
            },
            num_items=self.cfg.dataset_size,
            item_size=self.cfg.tokens_per_sample,
        )

    @property
    def source_dictionary(self):
        return self.dictionary

    @property
    def target_dictionary(self):
        return self.dictionary
