# Supplementary material
Source: ML conference proceedings conference paper supplement (https://proceedings.neurips.cc/paper_files/paper/2022/hash/0f5fcf4bff73a3537e0813a38f0d3f76-Abstract.html)
Supplement: Supplementary file 1 [file 0f5fcf4bff73a3537e0813a38f0d3f76-Supplemental-Conference.zip › supplemental/fairseq/fairseq/fairseq/pdb.py]

# Copyright (c) Facebook, Inc. and its affiliates.
#
# This source code is licensed under the MIT license found in the
# LICENSE file in the root directory of this source tree.

import multiprocessing
import os
import pdb
import sys


__all__ = ["set_trace"]


_stdin = [None]
_stdin_lock = multiprocessing.Lock()
try:
    _stdin_fd = sys.stdin.fileno()
except Exception:
    _stdin_fd = None


class MultiprocessingPdb(pdb.Pdb):
    """A Pdb wrapper that works in a multiprocessing environment.

    Usage: `from fairseq import pdb; pdb.set_trace()`
    """

    def __init__(self):
        pdb.Pdb.__init__(self, nosigint=True)

    def _cmdloop(self):
        stdin_bak = sys.stdin
        with _stdin_lock:
            try:
                if _stdin_fd is not None:
                    if not _stdin[0]:
                        _stdin[0] = os.fdopen(_stdin_fd)
                    sys.stdin = _stdin[0]
                self.cmdloop()
            finally:
                sys.stdin = stdin_bak


def set_trace():
    pdb = MultiprocessingPdb()
    pdb.set_trace(sys._getframe().f_back)
