# Supplementary material
Source: ML conference proceedings conference paper supplement (https://proceedings.neurips.cc/paper_files/paper/2022/hash/0f5fcf4bff73a3537e0813a38f0d3f76-Abstract.html)
Supplement: Supplementary file 1 [file 0f5fcf4bff73a3537e0813a38f0d3f76-Supplemental-Conference.zip › supplemental/fairseq/fairseq/fairseq/tasks/translation_cl.py]

from dataclasses import dataclass, field
import itertools
import json
import logging
import os
from typing import Optional
from argparse import Namespace

import torch
from fairseq.tasks.translation import TranslationConfig, TranslationTask, load_langpair_dataset
from omegaconf import II

import numpy as np
from fairseq import metrics, utils
from fairseq.data import (
    AppendTokenDataset,
    ConcatDataset,
    LanguagePairDataset,
    data_utils,
    encoders,
    indexed_dataset,
)

from fairseq.tasks import FairseqTask, register_task

logger = logging.getLogger(__name__)

EVAL_BLEU_ORDER = 4


@register_task("translation_cl", dataclass=TranslationConfig)
class TranslationCLTask(FairseqTask):
    """
    Translate from one (source) language to another (target) language.

    Args:
        src_dict (~fairseq.data.Dictionary): dictionary for the source language
        tgt_dict (~fairseq.data.Dictionary): dictionary for the target language

    .. note::

        The translation task is compatible with :mod:`fairseq-train`,
        :mod:`fairseq-generate` and :mod:`fairseq-interactive`.
    """

    cfg: TranslationConfig

    def __init__(self, cfg: TranslationConfig, src_dict, tgt_dict):
        super().__init__(cfg)
        self.src_dict = src_dict
        self.tgt_dict = tgt_dict

    @classmethod
    def setup_task(cls, cfg: TranslationConfig, **kwargs):
        """Setup the task (e.g., load dictionaries).

        Args:
            args (argparse.Namespace): parsed command-line arguments
        """

        paths = utils.split_paths(cfg.data)
        assert len(paths) > 0
        # find language pair automatically
        if cfg.source_lang is None or cfg.target_lang is None:
            cfg.source_lang, cfg.target_lang = data_utils.infer_language_pair(paths[0])
        if cfg.source_lang is None or cfg.target_lang is None:
            raise Exception(
                "Could not infer language pair, please provide it explicitly"
            )

        # load dictionaries
        src_dict = cls.load_dictionary(
            os.path.join(paths[0], "dict.{}.txt".format(cfg.source_lang))
        )
        tgt_dict = cls.load_dictionary(
            os.path.join(paths[0], "dict.{}.txt".format(cfg.target_lang))
        )
        assert src_dict.pad() == tgt_dict.pad()
        assert src_dict.eos() == tgt_dict.eos()
        assert src_dict.unk() == tgt_dict.unk()
        logger.info("[{}] dictionary: {} types".format(cfg.source_lang, len(src_dict)))
        logger.info("[{}] dictionary: {} types".format(cfg.target_lang, len(tgt_dict)))

        return cls(cfg, src_dict, tgt_dict)

    def load_dataset(self, split, epoch=1, combine=False, **kwargs):
        """Load a given dataset split.

        Args:
            split (str): name of the split (e.g., train, valid, test)
        """
        paths = utils.split_paths(self.cfg.data)
        assert len(paths) > 0
        if split != self.cfg.train_subset:
            # if not training data set, use the first shard for valid and test
            paths = paths[:1]
        data_path = paths[(epoch - 1) % len(paths)]

        # infer langcode
        src, tgt = self.cfg.source_lang, self.cfg.target_lang

        self.datasets[split] = load_langpair_dataset(
            data_path,
            split,
            src,
            self.src_dict,
            tgt,
            self.tgt_dict,
            combine=combine,
            dataset_impl=self.cfg.dataset_impl,
            upsample_primary=self.cfg.upsample_primary,
            left_pad_source=self.cfg.left_pad_source,
            left_pad_target=self.cfg.left_pad_target,
            max_source_positions=self.cfg.max_source_positions,
            max_target_positions=self.cfg.max_target_positions,
            load_alignments=self.cfg.load_alignments,
            truncate_source=self.cfg.truncate_source,
            num_buckets=self.cfg.num_batch_buckets,
            shuffle=(split != "test"),
            pad_to_multiple=self.cfg.required_seq_len_multiple,
        )

    def build_dataset_for_inference(self, src_tokens, src_lengths, constraints=None):
        return LanguagePairDataset(
            src_tokens,
            src_lengths,
            self.source_dictionary,
            tgt_dict=self.target_dictionary,
            constraints=constraints,
        )

    def build_model(self, cfg, from_checkpoint=False):
        model = super().build_model(cfg, from_checkpoint)
        if self.cfg.eval_bleu:
            detok_args = json.loads(self.cfg.eval_bleu_detok_args)
            self.tokenizer = encoders.build_tokenizer(
                Namespace(tokenizer=self.cfg.eval_bleu_detok, **detok_args)
            )

            gen_args = json.loads(self.cfg.eval_bleu_args)
            self.sequence_generator = self.build_generator(
                [model], Namespace(**gen_args)
            )
        return model

    def reduce_metrics(self, logging_outputs, criterion):
        super().reduce_metrics(logging_outputs, criterion)

        if self.cfg.eval_bleu:

            def sum_logs(key):
                import torch

                result = sum(log.get(key, 0) for log in logging_outputs)
                if torch.is_tensor(result):
                    result = result.cpu()
                return result

            counts, totals = [], []
            for i in range(EVAL_BLEU_ORDER):
                counts.append(sum_logs("_bleu_counts_" + str(i)))
                totals.append(sum_logs("_bleu_totals_" + str(i)))

            if max(totals) > 0:
                # log counts as numpy arrays -- log_scalar will sum them correctly
                metrics.log_scalar("_bleu_counts", np.array(counts))
                metrics.log_scalar("_bleu_totals", np.array(totals))
                metrics.log_scalar("_bleu_sys_len", sum_logs("_bleu_sys_len"))
                metrics.log_scalar("_bleu_ref_len", sum_logs("_bleu_ref_len"))

                def compute_bleu(meters):
                    import inspect

                    try:
                        from sacrebleu.metrics import BLEU

                        comp_bleu = BLEU.compute_bleu
                    except ImportError:
                        # compatibility API for sacrebleu 1.x
                        import sacrebleu

                        comp_bleu = sacrebleu.compute_bleu

                    fn_sig = inspect.getfullargspec(comp_bleu)[0]
                    if "smooth_method" in fn_sig:
                        smooth = {"smooth_method": "exp"}
                    else:
                        smooth = {"smooth": "exp"}
                    bleu = comp_bleu(
                        correct=meters["_bleu_counts"].sum,
                        total=meters["_bleu_totals"].sum,
                        sys_len=meters["_bleu_sys_len"].sum,
                        ref_len=meters["_bleu_ref_len"].sum,
                        **smooth,
                    )
                    return round(bleu.score, 2)

                metrics.log_derived("bleu", compute_bleu)

    def max_positions(self):
        """Return the max sentence length allowed by the task."""
        return (self.cfg.max_source_positions, self.cfg.max_target_positions)

    @property
    def source_dictionary(self):
        """Return the source :class:`~fairseq.data.Dictionary`."""
        return self.src_dict

    @property
    def target_dictionary(self):
        """Return the target :class:`~fairseq.data.Dictionary`."""
        return self.tgt_dict

    def valid_step(self, sample, model, criterion):
        loss, sample_size, logging_output = super().valid_step(sample, model, criterion)
        if self.cfg.eval_bleu:
            bleu = self._inference_with_bleu(None, sample, model)
            logging_output["_bleu_sys_len"] = bleu.sys_len
            logging_output["_bleu_ref_len"] = bleu.ref_len
            # we split counts into separate entries so that they can be
            # summed efficiently across workers using fast-stat-sync
            assert len(bleu.counts) == EVAL_BLEU_ORDER
            for i in range(EVAL_BLEU_ORDER):
                logging_output["_bleu_counts_" + str(i)] = bleu.counts[i]
                logging_output["_bleu_totals_" + str(i)] = bleu.totals[i]
        return loss, sample_size, logging_output

    def inference_step(
            self, generator, models, sample, prefix_tokens=None, constraints=None
    ):
        with torch.no_grad():
            return models[0].inference(sample)

    def _inference_with_bleu(self, generator, sample, model):
        import sacrebleu

        def decode(toks, escape_unk=False):
            s = self.tgt_dict.string(
                toks.int().cpu(),
                self.cfg.eval_bleu_remove_bpe,
                # The default unknown string in fairseq is `<unk>`, but
                # this is tokenized by sacrebleu as `< unk >`, inflating
                # BLEU scores. Instead, we use a somewhat more verbose
                # alternative that is unlikely to appear in the real
                # reference, but doesn't get split into multiple tokens.
                unk_string=("UNKNOWNTOKENINREF" if escape_unk else "UNKNOWNTOKENINHYP"),
            )
            if self.tokenizer:
                s = self.tokenizer.decode(s)
            return s

        gen_out = model.inference(sample)
        hyps, refs = [], []

        for i in range(len(gen_out)):
            hyps.append(decode(
                utils.strip_pad(gen_out[i][1:], self.tgt_dict.pad()),
                escape_unk=True,  # don't count <unk> as matches to the hypo
            ))
            refs.append(
                decode(
                    utils.strip_pad(sample["target"][i], self.tgt_dict.pad()),
                    escape_unk=True,  # don't count <unk> as matches to the hypo
                )
            )
        if self.cfg.eval_bleu_print_samples:
            logger.info("example hypothesis: " + hyps[0])
            logger.info("example reference: " + refs[0])
        if self.cfg.eval_tokenized_bleu:
            return sacrebleu.corpus_bleu(hyps, [refs], tokenize="none")
        else:
            return sacrebleu.corpus_bleu(hyps, [refs])
