# Supplementary material
Source: ML conference proceedings conference paper supplement (https://proceedings.neurips.cc/paper_files/paper/2022/hash/0f5fcf4bff73a3537e0813a38f0d3f76-Abstract.html)
Supplement: Supplementary file 1 [file 0f5fcf4bff73a3537e0813a38f0d3f76-Supplemental-Conference.zip › supplemental/fairseq/fairseq/scripts/read_binarized.py]

#!/usr/bin/env python3
# Copyright (c) Facebook, Inc. and its affiliates.
#
# This source code is licensed under the MIT license found in the
# LICENSE file in the root directory of this source tree.

import argparse

from fairseq.data import Dictionary, data_utils, indexed_dataset


def get_parser():
    parser = argparse.ArgumentParser(
        description="writes text from binarized file to stdout"
    )
    # fmt: off
    parser.add_argument('--dataset-impl', help='dataset implementation',
                        choices=indexed_dataset.get_available_dataset_impl())
    parser.add_argument('--dict', metavar='FP', help='dictionary containing known words', default=None)
    parser.add_argument('--input', metavar='FP', required=True, help='binarized file to read')
    # fmt: on

    return parser


def main():
    parser = get_parser()
    args = parser.parse_args()

    dictionary = Dictionary.load(args.dict) if args.dict is not None else None
    dataset = data_utils.load_indexed_dataset(
        args.input,
        dictionary,
        dataset_impl=args.dataset_impl,
        default="lazy",
    )

    for tensor_line in dataset:
        if dictionary is None:
            line = " ".join([str(int(x)) for x in tensor_line])
        else:
            line = dictionary.string(tensor_line)

        print(line)


if __name__ == "__main__":
    main()
