# Supplementary material
Source: ML conference proceedings conference paper supplement (https://proceedings.neurips.cc/paper_files/paper/2022/hash/0f5fcf4bff73a3537e0813a38f0d3f76-Abstract.html)
Supplement: Supplementary file 1 [file 0f5fcf4bff73a3537e0813a38f0d3f76-Supplemental-Conference.zip › supplemental/fairseq/fairseq/scripts/sacrebleu.sh]

#!/bin/bash

if [ $# -ne 4 ]; then
    echo "usage: $0 TESTSET SRCLANG TGTLANG GEN"
    exit 1
fi

TESTSET=$1
SRCLANG=$2
TGTLANG=$3

GEN=$4

if ! command -v sacremoses &> /dev/null
then
    echo "sacremoses could not be found, please install with: pip install sacremoses"
    exit
fi

grep ^H $GEN \
| sed 's/^H\-//' \
| sort -n -k 1 \
| cut -f 3 \
| sacremoses detokenize \
> $GEN.sorted.detok

sacrebleu --test-set $TESTSET --language-pair "${SRCLANG}-${TGTLANG}" < $GEN.sorted.detok
