# Supplementary material
Source: ML conference proceedings conference paper supplement (https://proceedings.neurips.cc/paper_files/paper/2022/hash/0f5fcf4bff73a3537e0813a38f0d3f76-Abstract.html)
Supplement: Supplementary file 1 [file 0f5fcf4bff73a3537e0813a38f0d3f76-Supplemental-Conference.zip › supplemental/fairseq/fairseq/scripts/split_train_valid_docs.py]

#!/usr/bin/env python3
# Copyright (c) Facebook, Inc. and its affiliates.
#
# This source code is licensed under the MIT license found in the
# LICENSE file in the root directory of this source tree.
"""
Split a large file into a train and valid set while respecting document
boundaries. Documents should be separated by a single empty line.
"""

import argparse
import random
import sys


def main():
    parser = argparse.ArgumentParser()
    parser.add_argument("input")
    parser.add_argument("sample_output", help="train output file")
    parser.add_argument("remainder_output", help="valid output file")
    parser.add_argument("-k", type=int, help="remainder size")
    parser.add_argument(
        "--lines", action="store_true", help="split lines instead of docs"
    )
    args = parser.parse_args()

    assert args.k is not None

    sample = []
    remainder = []
    num_docs = [0]

    def update_sample(doc):
        if len(sample) < args.k:
            sample.append(doc.copy())
        else:
            i = num_docs[0]
            j = random.randrange(i + 1)
            if j < args.k:
                remainder.append(sample[j])
                sample[j] = doc.copy()
            else:
                remainder.append(doc.copy())
        num_docs[0] += 1
        doc.clear()

    with open(args.input, "r", encoding="utf-8") as h:
        doc = []
        for i, line in enumerate(h):
            if line.strip() == "":  # empty line indicates new document
                update_sample(doc)
            else:
                doc.append(line)
            if args.lines:
                update_sample(doc)
            if i % 1000000 == 0:
                print(i, file=sys.stderr, end="", flush=True)
            elif i % 100000 == 0:
                print(".", file=sys.stderr, end="", flush=True)
        if len(doc) > 0:
            update_sample(doc)
    print(file=sys.stderr, flush=True)

    assert len(sample) == args.k

    with open(args.sample_output, "w", encoding="utf-8") as out:
        first = True
        for doc in sample:
            if not first and not args.lines:
                out.write("\n")
            first = False
            for line in doc:
                out.write(line)

    with open(args.remainder_output, "w", encoding="utf-8") as out:
        first = True
        for doc in remainder:
            if not first and not args.lines:
                out.write("\n")
            first = False
            for line in doc:
                out.write(line)


if __name__ == "__main__":
    main()
