# Supplementary material
Source: ML conference proceedings conference paper supplement (https://proceedings.neurips.cc/paper_files/paper/2022/hash/0f5fcf4bff73a3537e0813a38f0d3f76-Abstract.html)
Supplement: Supplementary file 1 [file 0f5fcf4bff73a3537e0813a38f0d3f76-Supplemental-Conference.zip › supplemental/fairseq/score.py]

#!/usr/bin/env python3
# Copyright (c) Facebook, Inc. and its affiliates.
#
# This source code is licensed under the MIT license found in the
# LICENSE file in the root directory of this source tree.
"""
BLEU scoring of generated translations against reference translations.
"""

import argparse
import os
import sys

from fairseq.data import dictionary
from fairseq.scoring import bleu


def get_parser():
    parser = argparse.ArgumentParser(
        description="Command-line script for BLEU scoring."
    )
    # fmt: off
    parser.add_argument('-s', '--sys', default='-', help='system output')
    parser.add_argument('-r', '--ref', required=True, help='references')
    parser.add_argument('-o', '--order', default=4, metavar='N',
                        type=int, help='consider ngrams up to this order')
    parser.add_argument('--ignore-case', action='store_true',
                        help='case-insensitive scoring')
    parser.add_argument('--sacrebleu', action='store_true',
                        help='score with sacrebleu')
    parser.add_argument('--beam')
    parser.add_argument('--sentence-bleu', action='store_true',
                        help='report sentence-level BLEUs (i.e., with +1 smoothing)')
    # fmt: on
    return parser


def cli_main():
    parser = get_parser()
    args = parser.parse_args()
    print(args)

    assert args.sys == "-" or os.path.exists(
        args.sys
    ), "System output file {} does not exist".format(args.sys)
    assert os.path.exists(args.ref), "Reference file {} does not exist".format(args.ref)

    dict = dictionary.Dictionary()

    def readlines(fd):
        for line in fd.readlines():
            if args.ignore_case:
                yield line.lower()
            else:
                yield line

    if args.sacrebleu:
        import sacrebleu

        def score(fdsys):
            with open(args.ref) as fdref:
                print(sacrebleu.corpus_bleu(fdsys, [fdref]).format())

    elif args.sentence_bleu:

        def score(fdsys):
            with open(args.ref) as fdref:
                scorer = bleu.Scorer(dict.pad(), dict.eos(), dict.unk())
                for i, (sys_tok, ref_tok) in enumerate(
                    zip(readlines(fdsys), readlines(fdref))
                ):
                    scorer.reset(one_init=True)
                    sys_tok = dict.encode_line(sys_tok)
                    ref_tok = dict.encode_line(ref_tok)
                    scorer.add(ref_tok, sys_tok)
                    print(i, scorer.result_string(args.order))

    else:

        def score(fdsys):
            with open(args.ref) as fdref:
                scorer = bleu.Scorer(
                    bleu.BleuConfig(
                        pad=dict.pad(),
                        eos=dict.eos(),
                        unk=dict.unk(),
                    )
                )
                for sys_tok, ref_tok in zip(readlines(fdsys), readlines(fdref)):
                    sys_tok = dict.encode_line(sys_tok)
                    ref_tok = dict.encode_line(ref_tok)
                    scorer.add(ref_tok, sys_tok)
                print(scorer.result_string(args.order))

    if args.sys == "-":
        score(sys.stdin)
    else:
        with open(args.sys, "r") as f:
            score(f)


if __name__ == "__main__":
    cli_main()
