# Supplementary material
Source: ML conference proceedings conference paper supplement (https://proceedings.neurips.cc/paper_files/paper/2022/hash/0f5fcf4bff73a3537e0813a38f0d3f76-Abstract.html)
Supplement: Supplementary file 1 [file 0f5fcf4bff73a3537e0813a38f0d3f76-Supplemental-Conference.zip › supplemental/fairseq/subword-nmt/CHANGELOG.md]

CHANGELOG
---------

v0.3.8:
  - multiprocessing support (get_vocab and apply_bpe)
  - progress bar for learn_bpe
  - seed parameter for deterministic BPE dropout
  - ignore some unicode line separators which would crash subword-nmt

v0.3.7:
  - BPE dropout (Provilkov et al., 2019)
  - more efficient glossaries (https://github.com/rsennrich/subword-nmt/pull/69)

v0.3.6:
  - fix to subword-bpe command encoding

v0.3.5:
  - fix to subword-bpe command under Python 2
  - wider support of --total-symbols argument

v0.3.4:
  - segment_tokens method to improve library usability (https://github.com/rsennrich/subword-nmt/pull/52)
  - support regex glossaries (https://github.com/rsennrich/subword-nmt/pull/56)
  - allow unicode separators (https://github.com/rsennrich/subword-nmt/pull/57)
  - new option --total-symbols in learn-bpe (commit 61ad8)
  - fix documentation (best practices) (https://github.com/rsennrich/subword-nmt/pull/60)

v0.3:
 - library is now installable via pip
 - fix occasional problems with UTF-8 whitespace and new lines in learn_bpe and apply_bpe.
   - do not silently convert UTF-8 newline characters into "\n"
   - do not silently convert UTF-8 whitespace characters into " "
   - UTF-8 whitespace and newline characters are now considered part of a word, and segmented by BPE

v0.2:
 - different, more consistent handling of end-of-word token (commit a749a7) (https://github.com/rsennrich/subword-nmt/issues/19)
 - allow passing of vocabulary and frequency threshold to apply_bpe.py, preventing the production of OOV (or rare) subword units (commit a00db)
 - made learn_bpe.py deterministic (commit 4c54e)
 - various changes to make handling of UTF more consistent between Python versions
 - new command line arguments for apply_bpe.py:
   - '--glossaries' to prevent given strings from being affected by BPE
   - '--merges' to apply a subset of learned BPE operations
 - new command line arguments for learn_bpe.py:
   - '--dict-input': rather than raw text file, interpret input as a frequency dictionary (as created by get_vocab.py).


v0.1:
 - consistent cross-version unicode handling
 - all scripts are now deterministic
