# Supplementary material
Source: ML conference proceedings conference paper supplement (https://proceedings.neurips.cc/paper_files/paper/2022/hash/0f5fcf4bff73a3537e0813a38f0d3f76-Abstract.html)
Supplement: Supplementary file 1 [file 0f5fcf4bff73a3537e0813a38f0d3f76-Supplemental-Conference.zip › supplemental/fairseq/subword-nmt/subword_nmt/get_vocab.py]

#! /usr/bin/env python
from __future__ import print_function

import os
import sys
import inspect
import warnings
import argparse
import codecs

from collections import Counter

# hack for python2/3 compatibility
from io import open
argparse.open = open

def create_parser(subparsers=None):

    if subparsers:
        parser = subparsers.add_parser('get-vocab',
            formatter_class=argparse.RawDescriptionHelpFormatter,
            description="Generates vocabulary")
    else:
        parser = argparse.ArgumentParser(
            formatter_class=argparse.RawDescriptionHelpFormatter,
            description="Generates vocabulary")

    parser.add_argument(
        '--input', '-i', type=argparse.FileType('r'), default=sys.stdin,
        metavar='PATH',
        help="Input file (default: standard input).")

    parser.add_argument(
        '--output', '-o', type=argparse.FileType('w'), default=sys.stdout,
        metavar='PATH',
        help="Output file (default: standard output)")

    return parser

def get_vocab(train_file, vocab_file):

    c = Counter()

    for line in train_file:
        for word in line.strip('\r\n ').split(' '):
            if word:
                c[word] += 1

    for key,f in sorted(c.items(), key=lambda x: x[1], reverse=True):
        vocab_file.write(key+" "+ str(f) + "\n")

if __name__ == "__main__":

    currentdir = os.path.dirname(os.path.abspath(inspect.getfile(inspect.currentframe())))
    newdir = os.path.join(currentdir, 'subword_nmt')
    if os.path.isdir(newdir):
        warnings.simplefilter('default')
        warnings.warn(
            "this script's location has moved to {0}. This symbolic link will be removed in a future version. Please point to the new location, or install the package and use the command 'subword-nmt'".format(newdir),
            DeprecationWarning
        )

    # python 2/3 compatibility
    if sys.version_info < (3, 0):
        sys.stderr = codecs.getwriter('UTF-8')(sys.stderr)
        sys.stdout = codecs.getwriter('UTF-8')(sys.stdout)
        sys.stdin = codecs.getreader('UTF-8')(sys.stdin)
    else:
        sys.stderr = codecs.getwriter('UTF-8')(sys.stderr.buffer)
        sys.stdout = codecs.getwriter('UTF-8')(sys.stdout.buffer)
        sys.stdin = codecs.getreader('UTF-8')(sys.stdin.buffer)

    parser = create_parser()
    args = parser.parse_args()

    # read/write files as UTF-8
    if args.input.name != '<stdin>':
        args.input = codecs.open(args.input.name, encoding='utf-8')
    if args.output.name != '<stdout>':
        args.output = codecs.open(args.output.name, 'w', encoding='utf-8')

    get_vocab(args.input, args.output)
