# Supplementary material
Source: ML conference proceedings conference paper supplement (https://proceedings.neurips.cc/paper_files/paper/2022/hash/0f5fcf4bff73a3537e0813a38f0d3f76-Abstract.html)
Supplement: Supplementary file 1 [file 0f5fcf4bff73a3537e0813a38f0d3f76-Supplemental-Conference.zip › supplemental/fairseq/validate.py]

#!/usr/bin/env python3 -u
# Copyright (c) Facebook, Inc. and its affiliates.
#
# This source code is licensed under the MIT license found in the
# LICENSE file in the root directory of this source tree.

import logging
import os
import sys
from argparse import Namespace
from itertools import chain

import torch
from omegaconf import DictConfig

from fairseq import checkpoint_utils, distributed_utils, options, utils
from fairseq.dataclass.utils import convert_namespace_to_omegaconf
from fairseq.logging import metrics, progress_bar
from fairseq.utils import reset_logging

logging.basicConfig(
    format="%(asctime)s | %(levelname)s | %(name)s | %(message)s",
    datefmt="%Y-%m-%d %H:%M:%S",
    level=os.environ.get("LOGLEVEL", "INFO").upper(),
    stream=sys.stdout,
)
logger = logging.getLogger("fairseq_cli.validate")


def main(cfg: DictConfig, override_args=None):
    if isinstance(cfg, Namespace):
        cfg = convert_namespace_to_omegaconf(cfg)

    utils.import_user_module(cfg.common)

    reset_logging()

    assert (
        cfg.dataset.max_tokens is not None or cfg.dataset.batch_size is not None
    ), "Must specify batch size either with --max-tokens or --batch-size"

    use_fp16 = cfg.common.fp16
    use_cuda = torch.cuda.is_available() and not cfg.common.cpu

    if use_cuda:
        torch.cuda.set_device(cfg.distributed_training.device_id)

    if cfg.distributed_training.distributed_world_size > 1:
        data_parallel_world_size = distributed_utils.get_data_parallel_world_size()
        data_parallel_rank = distributed_utils.get_data_parallel_rank()
    else:
        data_parallel_world_size = 1
        data_parallel_rank = 0

    if override_args is not None:
        overrides = vars(override_args)
        overrides.update(eval(getattr(override_args, "model_overrides", "{}")))
    else:
        overrides = None

    # Load ensemble
    logger.info("loading model(s) from {}".format(cfg.common_eval.path))
    models, saved_cfg, task = checkpoint_utils.load_model_ensemble_and_task(
        [cfg.common_eval.path],
        arg_overrides=overrides,
        suffix=cfg.checkpoint.checkpoint_suffix,
    )
    model = models[0]

    # Move models to GPU
    for model in models:
        model.eval()
        if use_fp16:
            model.half()
        if use_cuda:
            model.cuda()

    # Print args
    logger.info(saved_cfg)

    # Build criterion
    criterion = task.build_criterion(saved_cfg.criterion)
    criterion.eval()

    for subset in cfg.dataset.valid_subset.split(","):
        try:
            task.load_dataset(subset, combine=False, epoch=1, task_cfg=saved_cfg.task)
            dataset = task.dataset(subset)
        except KeyError:
            raise Exception("Cannot find dataset: " + subset)

        # Initialize data iterator
        itr = task.get_batch_iterator(
            dataset=dataset,
            max_tokens=cfg.dataset.max_tokens,
            max_sentences=cfg.dataset.batch_size,
            max_positions=utils.resolve_max_positions(
                task.max_positions(),
                *[m.max_positions() for m in models],
            ),
            ignore_invalid_inputs=cfg.dataset.skip_invalid_size_inputs_valid_test,
            required_batch_size_multiple=cfg.dataset.required_batch_size_multiple,
            seed=cfg.common.seed,
            num_shards=data_parallel_world_size,
            shard_id=data_parallel_rank,
            num_workers=cfg.dataset.num_workers,
            data_buffer_size=cfg.dataset.data_buffer_size,
        ).next_epoch_itr(shuffle=False)
        progress = progress_bar.progress_bar(
            itr,
            log_format=cfg.common.log_format,
            log_interval=cfg.common.log_interval,
            prefix=f"valid on '{subset}' subset",
            default_log_format=("tqdm" if not cfg.common.no_progress_bar else "simple"),
        )

        log_outputs = []
        for i, sample in enumerate(progress):
            sample = utils.move_to_cuda(sample) if use_cuda else sample
            _loss, _sample_size, log_output = task.valid_step(sample, model, criterion)
            progress.log(log_output, step=i)
            log_outputs.append(log_output)

        if data_parallel_world_size > 1:
            log_outputs = distributed_utils.all_gather_list(
                log_outputs,
                max_size=cfg.common.all_gather_list_size,
                group=distributed_utils.get_data_parallel_group(),
            )
            log_outputs = list(chain.from_iterable(log_outputs))

        with metrics.aggregate() as agg:
            task.reduce_metrics(log_outputs, criterion)
            log_output = agg.get_smoothed_values()

        progress.print(log_output, tag=subset, step=i)


def cli_main():
    parser = options.get_validation_parser()
    args = options.parse_args_and_arch(parser)

    # only override args that are explicitly given on the command line
    override_parser = options.get_validation_parser()
    override_args = options.parse_args_and_arch(override_parser, suppress_defaults=True)

    distributed_utils.call_main(
        convert_namespace_to_omegaconf(args), main, override_args=override_args
    )


if __name__ == "__main__":
    cli_main()
