# Supplementary material
Source: ML conference proceedings conference paper supplement (https://proceedings.neurips.cc/paper_files/paper/2022/hash/0f5fcf4bff73a3537e0813a38f0d3f76-Abstract.html)
Supplement: Supplementary file 1 [file 0f5fcf4bff73a3537e0813a38f0d3f76-Supplemental-Conference.zip › supplemental/transformers/evaluation/wmt_ROEN/eval.py]

import glob
import os
import copy
from collections import defaultdict
from argparse import ArgumentParser
import pickle
import json
from json import encoder
import math
import argparse


def load_jsonl(path):
    inst_list = []
    with open(path) as f:
        for line in f:
            inst_list.append(json.loads(line))
    return inst_list


def build_dict(insts):
    test_dict = {}
    # test_dir = os.path.join("datasets", dataset, "test.id.jsonl")
    for inst in insts:
        if "ref_out" in inst:
            gold = inst["ref_out"]
        else:
            gold = inst["sys_out"]
        if isinstance(gold, list):
            gold = ' '.join(gold)
        test_dict[inst["article_id"]] = gold.strip()
    return test_dict


def precook(s, n=4, out=False):
    """Takes a string as input and returns an object that can be given to
    either cook_refs or cook_test. This is optional: cook_refs and cook_test
    can take string arguments as well."""
    words = s.split()
    counts = defaultdict(int)
    for k in range(1, n + 1):
        for i in range(len(words) - k + 1):
            ngram = tuple(words[i:i + k])
            counts[ngram] += 1
    return (len(words), counts)


def cook_refs(refs, eff=None, n=4):  ## lhuang: oracle will call with "average"
    '''Takes a list of reference sentences for a single segment
    and returns an object that encapsulates everything that BLEU
    needs to know about them.'''

    reflen = []
    maxcounts = {}
    for ref in refs:
        rl, counts = precook(ref, n)
        reflen.append(rl)
        for (ngram, count) in counts.items():
            maxcounts[ngram] = max(maxcounts.get(ngram, 0), count)

    # Calculate effective reference sentence length.
    if eff == "shortest":
        reflen = min(reflen)
    elif eff == "average":
        reflen = float(sum(reflen)) / len(reflen)

    ## lhuang: N.B.: leave reflen computaiton to the very end!!

    ## lhuang: N.B.: in case of "closest", keep a list of reflens!! (bad design)

    return (reflen, maxcounts)


def cook_test(test, reflen, refmaxcounts, eff=None, n=4):
    '''Takes a test sentence and returns an object that
    encapsulates everything that BLEU needs to know about it.'''

    testlen, counts = precook(test, n, True)

    result = {}

    # Calculate effective reference sentence length.

    if eff == "closest":
        result["reflen"] = min((abs(l - testlen), l) for l in reflen)[1]
    else:  ## i.e., "average" or "shortest" or None
        result["reflen"] = reflen

    result["testlen"] = testlen

    result["guess"] = [max(0, testlen - k + 1) for k in range(1, n + 1)]

    result['correct'] = [0] * n
    for (ngram, count) in counts.items():
        result["correct"][len(ngram) - 1] += min(refmaxcounts.get(ngram, 0), count)

    return result


class BleuScorer(object):
    """Bleu scorer.
    """

    __slots__ = "n", "crefs", "ctest", "_score", "_ratio", "_testlen", "_reflen", "special_reflen"

    # special_reflen is used in oracle (proportional effective ref len for a node).

    def copy(self):
        ''' copy the refs.'''
        new = BleuScorer(n=self.n)
        new.ctest = copy.copy(self.ctest)
        new.crefs = copy.copy(self.crefs)
        new._score = None
        return new

    def __init__(self, test=None, refs=None, n=4, special_reflen=None):
        ''' singular instance '''

        self.n = n
        self.crefs = []
        self.ctest = []
        self.cook_append(test, refs)
        self.special_reflen = special_reflen

    def cook_append(self, test, refs):
        '''called by constructor and __iadd__ to avoid creating new instances.'''

        if refs is not None:
            self.crefs.append(cook_refs(refs))
            if test is not None:
                cooked_test = cook_test(test, self.crefs[-1][0], self.crefs[-1][1])
                self.ctest.append(cooked_test)  ## N.B.: -1
            else:
                self.ctest.append(None)  # lens of crefs and ctest have to match

        self._score = None  ## need to recompute

    def ratio(self, option=None):
        self.compute_score(option=option)
        return self._ratio

    def score_ratio(self, option=None):
        '''return (bleu, len_ratio) pair'''
        return (self.fscore(option=option), self.ratio(option=option))

    def score_ratio_str(self, option=None):
        return "%.4f (%.2f)" % self.score_ratio(option)

    def reflen(self, option=None):
        self.compute_score(option=option)
        return self._reflen

    def testlen(self, option=None):
        self.compute_score(option=option)
        return self._testlen

    def retest(self, new_test):
        if type(new_test) is str:
            new_test = [new_test]
        assert len(new_test) == len(self.crefs), new_test
        self.ctest = []
        for t, rs in zip(new_test, self.crefs):
            self.ctest.append(cook_test(t, rs[0], rs[1]))
        self._score = None

        return self

    def rescore(self, new_test):
        ''' replace test(s) with new test(s), and returns the new score.'''

        return self.retest(new_test).compute_score()

    def size(self):
        assert len(self.crefs) == len(self.ctest), "refs/test mismatch! %d<>%d" % (len(self.crefs), len(self.ctest))
        return len(self.crefs)

    def __iadd__(self, other):
        '''add an instance (e.g., from another sentence).'''

        if type(other) is tuple:
            ## avoid creating new BleuScorer instances
            self.cook_append(other[0], other[1])
        else:
            assert self.compatible(other), "incompatible BLEUs."
            self.ctest.extend(other.ctest)
            self.crefs.extend(other.crefs)
            self._score = None  ## need to recompute

        return self

    def compatible(self, other):
        return isinstance(other, BleuScorer) and self.n == other.n

    def single_reflen(self, option="average"):
        return self._single_reflen(self.crefs[0][0], option)

    def _single_reflen(self, reflens, option=None, testlen=None):

        if option == "shortest":
            reflen = min(reflens)
        elif option == "average":
            reflen = float(sum(reflens)) / len(reflens)
        elif option == "closest":
            reflen = min((abs(l - testlen), l) for l in reflens)[1]
        else:
            assert False, "unsupported reflen option %s" % option

        return reflen

    def recompute_score(self, option=None, verbose=0):
        self._score = None
        return self.compute_score(option, verbose)

    def compute_score(self, option=None, verbose=0):
        n = self.n
        small = 1e-9
        tiny = 1e-15  ## so that if guess is 0 still return 0
        bleu_list = [[] for _ in range(n)]

        if self._score is not None:
            return self._score

        if option is None:
            option = "average" if len(self.crefs) == 1 else "closest"

        self._testlen = 0
        self._reflen = 0
        totalcomps = {'testlen': 0, 'reflen': 0, 'guess': [0] * n, 'correct': [0] * n}

        # for each sentence
        for comps in self.ctest:
            testlen = comps['testlen']
            self._testlen += testlen

            if self.special_reflen is None:  ## need computation
                reflen = self._single_reflen(comps['reflen'], option, testlen)
            else:
                reflen = self.special_reflen

            self._reflen += reflen

            for key in ['guess', 'correct']:
                for k in range(n):
                    totalcomps[key][k] += comps[key][k]

            # append per image bleu score
            bleu = 1.
            for k in range(n):
                bleu *= (float(comps['correct'][k]) + tiny) \
                        / (float(comps['guess'][k]) + small)
                bleu_list[k].append(bleu ** (1. / (k + 1)))
            ratio = (testlen + tiny) / (reflen + small)  ## N.B.: avoid zero division
            if ratio < 1:
                for k in range(n):
                    bleu_list[k][-1] *= math.exp(1 - 1 / ratio)

            if verbose > 1:
                print(comps, reflen)

        totalcomps['reflen'] = self._reflen
        totalcomps['testlen'] = self._testlen

        bleus = []
        bleu = 1.
        for k in range(n):
            bleu *= float(totalcomps['correct'][k] + tiny) \
                    / (totalcomps['guess'][k] + small)
            bleus.append(bleu ** (1. / (k + 1)))
        ratio = (self._testlen + tiny) / (self._reflen + small)  ## N.B.: avoid zero division
        if ratio < 1:
            for k in range(n):
                bleus[k] *= math.exp(1 - 1 / ratio)

        if verbose > 0:
            print(totalcomps)
            print("ratio:", ratio)

        self._score = bleus
        return self._score, bleu_list


class Bleu:
    def __init__(self, n=4):
        # default compute Blue score up to 4
        self._n = n
        self._hypo_for_image = {}
        self.ref_for_image = {}

    def compute_score(self, gts, res):
        assert (gts.keys() == res.keys())
        imgIds = gts.keys()

        bleu_scorer = BleuScorer(n=self._n)
        for id in imgIds:
            hypo = res[id]
            ref = gts[id]
            # print(hypo)
            # print(ref)
            # print("============")
            # exit(0)
            # Sanity check.
            assert (type(hypo) is list)
            assert (len(hypo) == 1)
            assert (type(ref) is list)
            assert (len(ref) >= 1)

            bleu_scorer += (hypo[0], ref)

        # score, scores = bleu_scorer.compute_score(option='shortest')
        score, scores = bleu_scorer.compute_score(option='closest', verbose=0)
        # score, scores = bleu_scorer.compute_score(option='average', verbose=1)

        # return (bleu, bleu_info)
        return score, scores

    def method(self):
        return "Bleu"


class QGEvalCap:
    def __init__(self, gts, res):
        self.gts = gts
        self.res = res

    def evaluate(self, not_print=True):
        output = []
        scorers = [
            (Bleu(1), "Bleu_1"),
            (Bleu(2), "Bleu_2"),
            (Bleu(3), "Bleu_3"),
            (Bleu(4), "Bleu_4"),

            # (meteor.Meteor(),"METEOR"),
            # (rouge.Rouge(), "ROUGE_L"),
            # (cider.Cider(), "CIDEr")
        ]

        # =================================================
        # Compute scores
        # =================================================
        for scorer, method in scorers:
            # print 'computing %s score...'%(scorer.method())
            score, scores = scorer.compute_score(self.gts, self.res)
            if type(method) == list:
                for sc, scs, m in zip(score, scores, method):
                    if not not_print:
                        print("%s: %0.5f" % (m, sc))
                    output.append(sc)
            else:
                if not not_print:
                    print("%s: %0.5f" % (method, score))
                output.append(score)
        return output


def eval_qg(res_dict, gts_dict, not_print=True):
    encoder.FLOAT_REPR = lambda o: format(o, '.4f')

    res = defaultdict(lambda: [])
    gts = defaultdict(lambda: [])

    for key in gts_dict.keys():
        res[key] = [res_dict[key].encode('utf-8')]
        gts[key].append(gts_dict[key].encode('utf-8'))

    QGEval = QGEvalCap(gts, res)
    return QGEval.evaluate(not_print)[-1]


if __name__ == "__main__":
    parser = argparse.ArgumentParser()
    parser.add_argument('--sys_file', default=None, type=str)
    parser.add_argument('--sys_path', default=None, type=str)
    args = parser.parse_args()
    if args.sys_path is not None:
        candidate_files = glob.glob(os.path.join(args.sys_path, "*.sys"))
        for candidate_file in candidate_files:
            sys_files = os.path.join(args.sys_path, candidate_file)
    else:
        candidate_files = [args.sys_file]
    for cand_file in candidate_files:
        ref_path = cand_file.replace('sys', 'ref')
        sys_path = cand_file
        print("evaluate: ", sys_path)
        sys_outputs = load_jsonl(sys_path)
        ref_outputs = load_jsonl(ref_path)
        ref_dict = build_dict(ref_outputs)
        pred_dict = build_dict(sys_outputs)
        bleus = eval_qg(ref_dict, pred_dict)
        for idx, bleu in enumerate(bleus):
            res = "BLEU{}: {:.4f}".format(idx + 1, bleu)
            print(res)
