# Supplementary material
Source: ML conference proceedings conference paper supplement (https://proceedings.neurips.cc/paper_files/paper/2022/hash/0f5fcf4bff73a3537e0813a38f0d3f76-Abstract.html)
Supplement: Supplementary file 1 [file 0f5fcf4bff73a3537e0813a38f0d3f76-Supplemental-Conference.zip › supplemental/transformers/fastNLP/core/instance.py]

r"""
instance 模块实现了Instance 类在fastNLP中对应sample。一个sample可以认为是一个Instance类型的对象。
便于理解的例子可以参考文档 :mod:`fastNLP.core.dataset` 中的表格

"""

__all__ = [
    "Instance"
]

from .utils import pretty_table_printer


class Instance(object):
    r"""
    Instance是fastNLP中对应一个sample的类。每个sample在fastNLP中是一个Instance对象。
    Instance一般与 :class:`~fastNLP.DataSet` 一起使用, Instance的初始化如下面的Example所示::
    
        >>>from fastNLP import Instance
        >>>ins = Instance(field_1=[1, 1, 1], field_2=[2, 2, 2])
        >>>ins["field_1"]
        [1, 1, 1]
        >>>ins.add_field("field_3", [3, 3, 3])
        >>>ins = Instance(**{'x1': 1, 'x2':np.zeros((3, 4))})
    """

    def __init__(self, **fields):

        self.fields = fields

    def add_field(self, field_name, field):
        r"""
        向Instance中增加一个field

        :param str field_name: 新增field的名称
        :param Any field: 新增field的内容
        """
        self.fields[field_name] = field

    def items(self):
        r"""
        返回一个迭代器，迭代器返回两个内容，第一个内容是field_name, 第二个内容是field_value
        
        :return: 一个迭代器
        """
        return self.fields.items()

    def __contains__(self, item):
        return item in self.fields

    def __getitem__(self, name):
        if name in self.fields:
            return self.fields[name]
        else:
            raise KeyError("{} not found".format(name))

    def __setitem__(self, name, field):
        return self.add_field(name, field)

    def __repr__(self):
        return str(pretty_table_printer(self))
