# Supplementary material
Source: ML conference proceedings conference paper supplement (https://proceedings.neurips.cc/paper_files/paper/2022/hash/0f5fcf4bff73a3537e0813a38f0d3f76-Abstract.html)
Supplement: Supplementary file 1 [file 0f5fcf4bff73a3537e0813a38f0d3f76-Supplemental-Conference.zip › supplemental/transformers/fastNLP/core/metrics.py]

r"""
metrics 模块实现了 fastNLP 所需的各种常用衡量指标，一般做为 :class:`~fastNLP.Trainer` 的参数使用。

"""
__all__ = [
    "MetricBase",
    "AccuracyMetric",
    "SpanFPreRecMetric",
    "CMRC2018Metric",
    "ClassifyFPreRecMetric",
    "ConfusionMatrixMetric"
]

import inspect
import warnings
from abc import abstractmethod
from collections import defaultdict
from typing import Union
from copy import deepcopy
import re

import numpy as np
import torch

from .utils import _CheckError
from .utils import _CheckRes
from .utils import _build_args
from .utils import _check_arg_dict_list
from .utils import _get_func_signature
from .utils import seq_len_to_mask
from .vocabulary import Vocabulary
from .utils import ConfusionMatrix


class MetricBase(object):
    r"""
    所有metrics的基类,所有的传入到Trainer, Tester的Metric需要继承自该对象，需要覆盖写入evaluate(), get_metric()方法。
    
        evaluate(xxx)中传入的是一个batch的数据。
        
        get_metric(xxx)当所有数据处理完毕，调用该方法得到最终的metric值
        
    以分类问题中，Accuracy计算为例
    假设model的forward返回dict中包含 `pred` 这个key, 并且该key需要用于Accuracy::
    
        class Model(nn.Module):
            def __init__(xxx):
                # do something
            def forward(self, xxx):
                # do something
                return {'pred': pred, 'other_keys':xxx} # pred's shape: batch_size x num_classes
                
    假设dataset中 `label` 这个field是需要预测的值，并且该field被设置为了target
    对应的AccMetric可以按如下的定义, version1, 只使用这一次::
    
        class AccMetric(MetricBase):
            def __init__(self):
                super().__init__()
    
                # 根据你的情况自定义指标
                self.corr_num = 0
                self.total = 0
    
            def evaluate(self, label, pred): # 这里的名称需要和dataset中target field与model返回的key是一样的，不然找不到对应的value
                # dev或test时，每个batch结束会调用一次该方法，需要实现如何根据每个batch累加metric
                self.total += label.size(0)
                self.corr_num += label.eq(pred).sum().item()
    
            def get_metric(self, reset=True): # 在这里定义如何计算metric
                acc = self.corr_num/self.total
                if reset: # 是否清零以便重新计算
                    self.corr_num = 0
                    self.total = 0
                return {'acc': acc} # 需要返回一个dict，key为该metric的名称，该名称会显示到Trainer的progress bar中


    version2，如果需要复用Metric，比如下一次使用AccMetric时，dataset中目标field不叫label而叫y，或者model的输出不是pred::
    
        class AccMetric(MetricBase):
            def __init__(self, label=None, pred=None):
                # 假设在另一场景使用时，目标field叫y，model给出的key为pred_y。则只需要在初始化AccMetric时，
                #   acc_metric = AccMetric(label='y', pred='pred_y')即可。
                # 当初始化为acc_metric = AccMetric()，即label=None, pred=None, fastNLP会直接使用'label', 'pred'作为key去索取对
                #   应的的值
                super().__init__()
                self._init_param_map(label=label, pred=pred) # 该方法会注册label和pred. 仅需要注册evaluate()方法会用到的参数名即可
                # 如果没有注册该则效果与version1就是一样的
    
                # 根据你的情况自定义指标
                self.corr_num = 0
                self.total = 0
    
            def evaluate(self, label, pred): # 这里的参数名称需要和self._init_param_map()注册时一致。
                # dev或test时，每个batch结束会调用一次该方法，需要实现如何根据每个batch累加metric
                self.total += label.size(0)
                self.corr_num += label.eq(pred).sum().item()
    
            def get_metric(self, reset=True): # 在这里定义如何计算metric
                acc = self.corr_num/self.total
                if reset: # 是否清零以便重新计算
                    self.corr_num = 0
                    self.total = 0
                return {'acc': acc} # 需要返回一个dict，key为该metric的名称，该名称会显示到Trainer的progress bar中


    ``MetricBase`` 将会在输入的字典 ``pred_dict`` 和 ``target_dict`` 中进行检查.
    ``pred_dict`` 是模型当中 ``forward()`` 函数或者 ``predict()`` 函数的返回值.
    ``target_dict`` 是DataSet当中的ground truth, 判定ground truth的条件是field的 ``is_target`` 被设置为True.

    ``MetricBase`` 会进行以下的类型检测:

    1. self.evaluate当中是否有varargs, 这是不支持的.
    2. self.evaluate当中所需要的参数是否既不在 ``pred_dict`` 也不在 ``target_dict`` .
    3. self.evaluate当中所需要的参数是否既在 ``pred_dict`` 也在 ``target_dict`` .

    除此以外，在参数被传入self.evaluate以前，这个函数会检测 ``pred_dict`` 和 ``target_dict`` 当中没有被用到的参数
    如果kwargs是self.evaluate的参数，则不会检测


    self.evaluate将计算一个批次(batch)的评价指标，并累计。 没有返回值
    self.get_metric将统计当前的评价指标并返回评价结果, 返回值需要是一个dict, key是指标名称，value是指标的值

    """

    def __init__(self):
        self._param_map = {}  # key is param in function, value is input param.
        self._checked = False
        self._metric_name = self.__class__.__name__

    @property
    def param_map(self):
        if len(self._param_map) == 0:  # 如果为空说明还没有初始化
            func_spect = inspect.getfullargspec(self.evaluate)
            func_args = [arg for arg in func_spect.args if arg != 'self']
            for arg in func_args:
                self._param_map[arg] = arg
        return self._param_map

    @abstractmethod
    def evaluate(self, *args, **kwargs):
        raise NotImplementedError

    @abstractmethod
    def get_metric(self, reset=True):
        raise NotImplemented

    def set_metric_name(self, name: str):
        r"""
        设置metric的名称，默认是Metric的class name.

        :param str name:
        :return: self
        """
        self._metric_name = name
        return self

    def get_metric_name(self):
        r"""
        返回metric的名称
        
        :return:
        """
        return self._metric_name

    def _init_param_map(self, key_map=None, **kwargs):
        r"""检查key_map和其他参数map，并将这些映射关系添加到self._param_map

        :param dict key_map: 表示key的映射关系
        :param kwargs: key word args里面的每一个的键-值对都会被构造成映射关系
        :return: None
        """
        value_counter = defaultdict(set)
        if key_map is not None:
            if not isinstance(key_map, dict):
                raise TypeError("key_map must be `dict`, got {}.".format(type(key_map)))
            for key, value in key_map.items():
                if value is None:
                    self._param_map[key] = key
                    continue
                if not isinstance(key, str):
                    raise TypeError(f"key in key_map must be `str`, not `{type(key)}`.")
                if not isinstance(value, str):
                    raise TypeError(f"value in key_map must be `str`, not `{type(value)}`.")
                self._param_map[key] = value
                value_counter[value].add(key)
        for key, value in kwargs.items():
            if value is None:
                self._param_map[key] = key
                continue
            if not isinstance(value, str):
                raise TypeError(f"in {key}={value}, value must be `str`, not `{type(value)}`.")
            self._param_map[key] = value
            value_counter[value].add(key)
        for value, key_set in value_counter.items():
            if len(key_set) > 1:
                raise ValueError(f"Several parameters:{key_set} are provided with one output {value}.")

        # check consistence between signature and _param_map
        func_spect = inspect.getfullargspec(self.evaluate)
        func_args = [arg for arg in func_spect.args if arg != 'self']
        for func_param, input_param in self._param_map.items():
            if func_param not in func_args:
                raise NameError(
                    f"Parameter `{func_param}` is not in {_get_func_signature(self.evaluate)}. Please check the "
                    f"initialization parameters, or change its signature.")

    def __call__(self, pred_dict, target_dict):
        r"""
        这个方法会调用self.evaluate 方法.
        在调用之前，会进行以下检测:
            1. self.evaluate当中是否有varargs, 这是不支持的.
            2. self.evaluate当中所需要的参数是否既不在``pred_dict``也不在``target_dict``.
            3. self.evaluate当中所需要的参数是否既在``pred_dict``也在``target_dict``.

            除此以外，在参数被传入self.evaluate以前，这个函数会检测``pred_dict``和``target_dict``当中没有被用到的参数
            如果kwargs是self.evaluate的参数，则不会检测
        :param pred_dict: 模型的forward函数或者predict函数返回的dict
        :param target_dict: DataSet.batch_y里的键-值对所组成的dict(即is_target=True的fields的内容)
        :return:
        """

        if not self._checked:
            if not callable(self.evaluate):
                raise TypeError(f"{self.__class__.__name__}.evaluate has to be callable, not {type(self.evaluate)}.")
            # 1. check consistence between signature and _param_map
            func_spect = inspect.getfullargspec(self.evaluate)
            func_args = set([arg for arg in func_spect.args if arg != 'self'])
            for func_arg, input_arg in self._param_map.items():
                if func_arg not in func_args:
                    raise NameError(f"`{func_arg}` not in {_get_func_signature(self.evaluate)}.")

            # 2. only part of the _param_map are passed, left are not
            for arg in func_args:
                if arg not in self._param_map:
                    self._param_map[arg] = arg  # This param does not need mapping.
            self._evaluate_args = func_args
            self._reverse_param_map = {input_arg: func_arg for func_arg, input_arg in self._param_map.items()}

        # need to wrap inputs in dict.
        mapped_pred_dict = {}
        mapped_target_dict = {}
        for input_arg, mapped_arg in self._reverse_param_map.items():
            if input_arg in pred_dict:
                mapped_pred_dict[mapped_arg] = pred_dict[input_arg]
            if input_arg in target_dict:
                mapped_target_dict[mapped_arg] = target_dict[input_arg]

        # missing
        if not self._checked:
            duplicated = []
            for input_arg, mapped_arg in self._reverse_param_map.items():
                if input_arg in pred_dict and input_arg in target_dict:
                    duplicated.append(input_arg)
            check_res = _check_arg_dict_list(self.evaluate, [mapped_pred_dict, mapped_target_dict])
            # only check missing.
            # replace missing.
            missing = check_res.missing
            replaced_missing = list(missing)
            for idx, func_arg in enumerate(missing):
                # Don't delete `` in this information, nor add ``
                replaced_missing[idx] = f"{self._param_map[func_arg]}" + f"(assign to `{func_arg}` " \
                                                                         f"in `{self.__class__.__name__}`)"

            check_res = _CheckRes(missing=replaced_missing,
                                  unused=check_res.unused,
                                  duplicated=duplicated,
                                  required=check_res.required,
                                  all_needed=check_res.all_needed,
                                  varargs=check_res.varargs)

            if check_res.missing or check_res.duplicated:
                raise _CheckError(check_res=check_res,
                                  func_signature=_get_func_signature(self.evaluate))
            self._checked = True
        refined_args = _build_args(self.evaluate, **mapped_pred_dict, **mapped_target_dict)

        self.evaluate(**refined_args)

        return


class ConfusionMatrixMetric(MetricBase):
    r"""
    分类问题计算混淆矩阵的Metric（其它的Metric参见 :mod:`fastNLP.core.metrics` ）
    最后返回结果为::
        
        dict,{'confusion_matrix': ConfusionMatrix实例}
        
    ConfusionMatrix实例的print()函数将输出矩阵字符串。
    
    .. code ::
    
        pred_dict = {"pred": torch.Tensor([2,1,3])}
        target_dict = {'target': torch.Tensor([2,2,1])}
        metric = ConfusionMatrixMetric()
        metric(pred_dict=pred_dict, target_dict=target_dict, )
        print(metric.get_metric())
        
    .. code ::
        
        {'confusion_matrix':
         target  1.0     2.0     3.0     all
           pred
            1.0    0       1       0       1
            2.0    0       1       0       1
            3.0    1       0       0       1
            all    1       2       0       3
        }
        
    """
    def __init__(self,
                 vocab=None,
                 pred=None,
                 target=None,
                 seq_len=None,
                 print_ratio=False
                ):
        r"""
        :param vocab: vocab词表类,要求有to_word()方法。
        :param pred: 参数映射表中 `pred` 的映射关系，None表示映射关系为 `pred` -> `pred`
        :param target: 参数映射表中 `target` 的映射关系，None表示映射关系为 `target` -> `target`
        :param seq_len: 参数映射表中 `seq_len` 的映射关系，None表示映射关系为 `seq_len` -> `seq_len`
        :param print_ratio: 限制print的输出，false only for result, true for result, percent(dim=0), percent(dim = 1) 
        """
        super().__init__()
        self._init_param_map(pred=pred, target=target, seq_len=seq_len)
        self.confusion_matrix = ConfusionMatrix(
            vocab=vocab,
            print_ratio=print_ratio,
        )

    def evaluate(self, pred, target, seq_len=None):
        r"""
        evaluate函数将针对一个批次的预测结果做评价指标的累计
        
        :param torch.Tensor pred: 预测的tensor, tensor的形状可以是torch.Size([B,]), torch.Size([B, n_classes]),
            torch.Size([B, max_len]), 或者torch.Size([B, max_len, n_classes])
        :param torch.Tensor target: 真实值的tensor, tensor的形状可以是Element's can be: torch.Size([B,]),
            torch.Size([B,]), torch.Size([B, max_len]), 或者torch.Size([B, max_len])
        :param torch.Tensor seq_len: 序列长度标记, 标记的形状可以是None, torch.Size([B]), 或者torch.Size([B]).
        """
        if not isinstance(pred, torch.Tensor):
            raise TypeError(
                f"`pred` in {_get_func_signature(self.evaluate)} must be torch.Tensor,"
                f"got {type(pred)}.")
        if not isinstance(target, torch.Tensor):
            raise TypeError(
                f"`target` in {_get_func_signature(self.evaluate)} must be torch.Tensor,"
                f"got {type(target)}.")

        if seq_len is not None and not isinstance(seq_len, torch.Tensor):
            raise TypeError(
                f"`seq_lens` in {_get_func_signature(self.evaluate)} must be torch.Tensor,"
                f"got {type(seq_len)}.")

        if pred.dim() == target.dim():
            if torch.numel(pred) !=torch.numel(target):
                raise RuntimeError(f"In {_get_func_signature(self.evaluate)}, when pred have same dimensions with target, they should have same element numbers. while target have "
                               f"element numbers:{torch.numel(target)}, pred have element numbers: {torch.numel(pred)}")

            pass
        elif pred.dim() == target.dim() + 1:
            pred = pred.argmax(dim=-1)
            if seq_len is None and target.dim() > 1:
                warnings.warn("You are not passing `seq_len` to exclude pad.")
        else:
            raise RuntimeError(
                f"In {_get_func_signature(self.evaluate)}, when pred have "
                f"size:{pred.size()}, target should have size: {pred.size()} or "
                f"{pred.size()[:-1]}, got {target.size()}.")

        target = target.to(pred)
        if seq_len is not None and target.dim() > 1:
            for p, t, l in zip(pred.tolist(), target.tolist(),
                               seq_len.tolist()):
                l = int(l)
                self.confusion_matrix.add_pred_target(p[:l], t[:l])
        elif target.dim() > 1:  #对于没有传入seq_len，但是又是高维的target，按全长输出
            for p, t in zip(pred.tolist(), target.tolist()):
                self.confusion_matrix.add_pred_target(p, t)
        else:
            self.confusion_matrix.add_pred_target(pred.tolist(),
                                                  target.tolist())

    def get_metric(self, reset=True):
        r"""
        get_metric函数将根据evaluate函数累计的评价指标统计量来计算最终的评价结果.
        :param bool reset: 在调用完get_metric后是否清空评价指标统计量.
        :return dict evaluate_result: {"confusion_matrix": ConfusionMatrix}
        """
        confusion = {'confusion_matrix': deepcopy(self.confusion_matrix)}
        if reset:
            self.confusion_matrix.clear()
        return confusion


class AccuracyMetric(MetricBase):
    r"""
    准确率Metric（其它的Metric参见 :mod:`fastNLP.core.metrics` ）
    """

    def __init__(self, pred=None, target=None, seq_len=None):
        r"""
        
        :param pred: 参数映射表中 `pred` 的映射关系，None表示映射关系为 `pred` -> `pred`
        :param target: 参数映射表中 `target` 的映射关系，None表示映射关系为 `target` -> `target`
        :param seq_len: 参数映射表中 `seq_len` 的映射关系，None表示映射关系为 `seq_len` -> `seq_len`
        """

        super().__init__()

        self._init_param_map(pred=pred, target=target, seq_len=seq_len)

        self.total = 0
        self.acc_count = 0

    def evaluate(self, pred, target, seq_len=None):
        r"""
        evaluate函数将针对一个批次的预测结果做评价指标的累计

        :param torch.Tensor pred: 预测的tensor, tensor的形状可以是torch.Size([B,]), torch.Size([B, n_classes]),
                torch.Size([B, max_len]), 或者torch.Size([B, max_len, n_classes])
        :param torch.Tensor target: 真实值的tensor, tensor的形状可以是Element's can be: torch.Size([B,]),
                torch.Size([B,]), torch.Size([B, max_len]), 或者torch.Size([B, max_len])
        :param torch.Tensor seq_len: 序列长度标记, 标记的形状可以是None, None, torch.Size([B]), 或者torch.Size([B]).
                如果mask也被传进来的话seq_len会被忽略.

        """
        # TODO 这里报错需要更改，因为pred是啥用户并不知道。需要告知用户真实的value
        if not isinstance(pred, torch.Tensor):
            raise TypeError(f"`pred` in {_get_func_signature(self.evaluate)} must be torch.Tensor,"
                            f"got {type(pred)}.")
        if not isinstance(target, torch.Tensor):
            raise TypeError(f"`target` in {_get_func_signature(self.evaluate)} must be torch.Tensor,"
                            f"got {type(target)}.")

        if seq_len is not None and not isinstance(seq_len, torch.Tensor):
            raise TypeError(f"`seq_lens` in {_get_func_signature(self.evaluate)} must be torch.Tensor,"
                            f"got {type(seq_len)}.")

        if seq_len is not None and target.dim() > 1:
            max_len = target.size(1)
            masks = seq_len_to_mask(seq_len=seq_len, max_len=max_len)
        else:
            masks = None

        if pred.dim() == target.dim():
            if torch.numel(pred) !=torch.numel(target):
                raise RuntimeError(f"In {_get_func_signature(self.evaluate)}, when pred have same dimensions with target, they should have same element numbers. while target have "
                               f"element numbers:{torch.numel(target)}, pred have element numbers: {torch.numel(pred)}")

            pass
        elif pred.dim() == target.dim() + 1:
            pred = pred.argmax(dim=-1)
            if seq_len is None and target.dim() > 1:
                warnings.warn("You are not passing `seq_len` to exclude pad when calculate accuracy.")
        else:
            raise RuntimeError(f"In {_get_func_signature(self.evaluate)}, when pred have "
                               f"size:{pred.size()}, target should have size: {pred.size()} or "
                               f"{pred.size()[:-1]}, got {target.size()}.")

        target = target.to(pred)
        if masks is not None:
            self.acc_count += torch.sum(torch.eq(pred, target).masked_fill(masks.eq(False), 0)).item()
            self.total += torch.sum(masks).item()
        else:
            self.acc_count += torch.sum(torch.eq(pred, target)).item()
            self.total += np.prod(list(pred.size()))

    def get_metric(self, reset=True):
        r"""
        get_metric函数将根据evaluate函数累计的评价指标统计量来计算最终的评价结果.

        :param bool reset: 在调用完get_metric后是否清空评价指标统计量.
        :return dict evaluate_result: {"acc": float}
        """
        evaluate_result = {'acc': round(float(self.acc_count) / (self.total + 1e-12), 6)}
        if reset:
            self.acc_count = 0
            self.total = 0
        return evaluate_result

class ClassifyFPreRecMetric(MetricBase):
    r"""
    分类问题计算FPR值的Metric（其它的Metric参见 :mod:`fastNLP.core.metrics` ）

    最后得到的metric结果为::

        {
            'f': xxx, # 这里使用f考虑以后可以计算f_beta值
            'pre': xxx,
            'rec':xxx
        }

    若only_gross=False, 即还会返回各个label的metric统计值::

        {
            'f': xxx,
            'pre': xxx,
            'rec':xxx,
            'f-label': xxx,
            'pre-label': xxx,
            'rec-label':xxx,
            ...
        }
    
    """

    def __init__(self, tag_vocab=None, pred=None, target=None, seq_len=None, ignore_labels=None,
                 only_gross=True, f_type='micro', beta=1):
        r"""

        :param tag_vocab: 标签的 :class:`~fastNLP.Vocabulary` . 默认值为None。若为None则使用数字来作为标签内容，否则使用vocab来作为标签内容。
        :param str pred: 用该key在evaluate()时从传入dict中取出prediction数据。 为None，则使用 `pred` 取数据
        :param str target: 用该key在evaluate()时从传入dict中取出target数据。 为None，则使用 `target` 取数据
        :param str seq_len: 用该key在evaluate()时从传入dict中取出sequence length数据。为None，则使用 `seq_len` 取数据。
        :param list ignore_labels: str 组成的list. 这个list中的class不会被用于计算。例如在POS tagging时传入['NN']，则不会计算'NN'个label
        :param bool only_gross: 是否只计算总的f1, precision, recall的值；如果为False，不仅返回总的f1, pre, rec, 还会返回每个label的f1, pre, rec
        :param str f_type: `micro` 或 `macro` . `micro` :通过先计算总体的TP，FN和FP的数量，再计算f, precision, recall; `macro` : 分布计算每个类别的f, precision, recall，然后做平均（各类别f的权重相同）
        :param float beta: f_beta分数， :math:`f_{beta} = \frac{(1 + {beta}^{2})*(pre*rec)}{({beta}^{2}*pre + rec)}` . 常用为 `beta=0.5, 1, 2` 若为0.5则精确率的权重高于召回率；若为1，则两者平等；若为2，则召回率权重高于精确率。
        """
        
        if tag_vocab:
            if not isinstance(tag_vocab, Vocabulary):
                raise TypeError("tag_vocab can only be fastNLP.Vocabulary, not {}.".format(type(tag_vocab)))
        if f_type not in ('micro', 'macro'):
            raise ValueError("f_type only supports `micro` or `macro`', got {}.".format(f_type))

        self.ignore_labels = ignore_labels
        self.f_type = f_type
        self.beta = beta
        self.beta_square = self.beta ** 2
        self.only_gross = only_gross

        super().__init__()
        self._init_param_map(pred=pred, target=target, seq_len=seq_len)

        self.tag_vocab = tag_vocab

        self._tp, self._fp, self._fn = defaultdict(int), defaultdict(int), defaultdict(int)
        # tp: truth=T, classify=T; fp: truth=T, classify=F; fn: truth=F, classify=T

    def evaluate(self, pred, target, seq_len=None):
        r"""
        evaluate函数将针对一个批次的预测结果做评价指标的累计

        :param torch.Tensor pred: 预测的tensor, tensor的形状可以是torch.Size([B,]), torch.Size([B, n_classes]),
                torch.Size([B, max_len]), 或者torch.Size([B, max_len, n_classes])
        :param torch.Tensor target: 真实值的tensor, tensor的形状可以是Element's can be: torch.Size([B,]),
                torch.Size([B,]), torch.Size([B, max_len]), 或者torch.Size([B, max_len])
        :param torch.Tensor seq_len: 序列长度标记, 标记的形状可以是None, None, torch.Size([B]), 或者torch.Size([B]).
                如果mask也被传进来的话seq_len会被忽略.

        """
        # TODO 这里报错需要更改，因为pred是啥用户并不知道。需要告知用户真实的value
        if not isinstance(pred, torch.Tensor):
            raise TypeError(f"`pred` in {_get_func_signature(self.evaluate)} must be torch.Tensor,"
                            f"got {type(pred)}.")
        if not isinstance(target, torch.Tensor):
            raise TypeError(f"`target` in {_get_func_signature(self.evaluate)} must be torch.Tensor,"
                            f"got {type(target)}.")

        if seq_len is not None and not isinstance(seq_len, torch.Tensor):
            raise TypeError(f"`seq_lens` in {_get_func_signature(self.evaluate)} must be torch.Tensor,"
                            f"got {type(seq_len)}.")

        if seq_len is not None and target.dim() > 1:
            max_len = target.size(1)
            masks = seq_len_to_mask(seq_len=seq_len, max_len=max_len)
        else:
            masks = torch.ones_like(target).long().to(target.device)

        masks = masks.eq(1)

        if pred.dim() == target.dim():
            if torch.numel(pred) !=torch.numel(target):
                raise RuntimeError(f"In {_get_func_signature(self.evaluate)}, when pred have same dimensions with target, they should have same element numbers. while target have "
                               f"element numbers:{torch.numel(target)}, pred have element numbers: {torch.numel(pred)}")

            pass
        elif pred.dim() == target.dim() + 1:
            pred = pred.argmax(dim=-1)
            if seq_len is None and target.dim() > 1:
                warnings.warn("You are not passing `seq_len` to exclude pad when calculate accuracy.")
        else:
            raise RuntimeError(f"In {_get_func_signature(self.evaluate)}, when pred have "
                               f"size:{pred.size()}, target should have size: {pred.size()} or "
                               f"{pred.size()[:-1]}, got {target.size()}.")

        target = target.to(pred)
        target = target.masked_select(masks)
        pred = pred.masked_select(masks)
        target_idxes = set(target.reshape(-1).tolist())
        for target_idx in target_idxes:
            self._tp[target_idx] += torch.sum((pred == target_idx).long().masked_fill(target != target_idx, 0)).item()
            self._fp[target_idx] += torch.sum((pred == target_idx).long().masked_fill(target == target_idx, 0)).item()
            self._fn[target_idx] += torch.sum((pred != target_idx).long().masked_fill(target != target_idx, 0)).item()

    def get_metric(self, reset=True):
        r"""
        get_metric函数将根据evaluate函数累计的评价指标统计量来计算最终的评价结果.

        :param bool reset: 在调用完get_metric后是否清空评价指标统计量.
        :return dict evaluate_result: {"acc": float}
        """
        evaluate_result = {}
        if not self.only_gross or self.f_type == 'macro':
            tags = set(self._fn.keys())
            tags.update(set(self._fp.keys()))
            tags.update(set(self._tp.keys()))
            f_sum = 0
            pre_sum = 0
            rec_sum = 0
            for tag in tags:
                if self.tag_vocab is not None:
                    tag_name = self.tag_vocab.to_word(tag)
                else:
                    tag_name = int(tag)
                tp = self._tp[tag]
                fn = self._fn[tag]
                fp = self._fp[tag]
                f, pre, rec = _compute_f_pre_rec(self.beta_square, tp, fn, fp)
                f_sum += f
                pre_sum += pre
                rec_sum += rec
                if not self.only_gross and tag != '':  # tag!=''防止无tag的情况
                    f_key = 'f-{}'.format(tag_name)
                    pre_key = 'pre-{}'.format(tag_name)
                    rec_key = 'rec-{}'.format(tag_name)
                    evaluate_result[f_key] = f
                    evaluate_result[pre_key] = pre
                    evaluate_result[rec_key] = rec

            if self.f_type == 'macro':
                evaluate_result['f'] = f_sum / len(tags)
                evaluate_result['pre'] = pre_sum / len(tags)
                evaluate_result['rec'] = rec_sum / len(tags)

        if self.f_type == 'micro':
            f, pre, rec = _compute_f_pre_rec(self.beta_square,
                                             sum(self._tp.values()),
                                             sum(self._fn.values()),
                                             sum(self._fp.values()))
            evaluate_result['f'] = f
            evaluate_result['pre'] = pre
            evaluate_result['rec'] = rec

        if reset:
            self._tp = defaultdict(int)
            self._fp = defaultdict(int)
            self._fn = defaultdict(int)

        for key, value in evaluate_result.items():
            evaluate_result[key] = round(value, 6)

        return evaluate_result


def _bmes_tag_to_spans(tags, ignore_labels=None):
    r"""
    给定一个tags的lis，比如['S-song', 'B-singer', 'M-singer', 'E-singer', 'S-moive', 'S-actor']。
    返回[('song', (0, 1)), ('singer', (1, 4)), ('moive', (4, 5)), ('actor', (5, 6))] (左闭右开区间)
    也可以是单纯的['S', 'B', 'M', 'E', 'B', 'M', 'M',...]序列

    :param tags: List[str],
    :param ignore_labels: List[str], 在该list中的label将被忽略
    :return: List[Tuple[str, List[int, int]]]. [(label，[start, end])]
    """
    ignore_labels = set(ignore_labels) if ignore_labels else set()

    spans = []
    prev_bmes_tag = None
    for idx, tag in enumerate(tags):
        tag = tag.lower()
        bmes_tag, label = tag[:1], tag[2:]
        if bmes_tag in ('b', 's'):
            spans.append((label, [idx, idx]))
        elif bmes_tag in ('m', 'e') and prev_bmes_tag in ('b', 'm') and label == spans[-1][0]:
            spans[-1][1][1] = idx
        else:
            spans.append((label, [idx, idx]))
        prev_bmes_tag = bmes_tag
    return [(span[0], (span[1][0], span[1][1] + 1))
            for span in spans
            if span[0] not in ignore_labels
            ]


def _bmeso_tag_to_spans(tags, ignore_labels=None):
    r"""
    给定一个tags的lis，比如['O', 'B-singer', 'M-singer', 'E-singer', 'O', 'O']。
    返回[('singer', (1, 4))] (左闭右开区间)

    :param tags: List[str],
    :param ignore_labels: List[str], 在该list中的label将被忽略
    :return: List[Tuple[str, List[int, int]]]. [(label，[start, end])]
    """
    ignore_labels = set(ignore_labels) if ignore_labels else set()

    spans = []
    prev_bmes_tag = None
    for idx, tag in enumerate(tags):
        tag = tag.lower()
        bmes_tag, label = tag[:1], tag[2:]
        if bmes_tag in ('b', 's'):
            spans.append((label, [idx, idx]))
        elif bmes_tag in ('m', 'e') and prev_bmes_tag in ('b', 'm') and label == spans[-1][0]:
            spans[-1][1][1] = idx
        elif bmes_tag == 'o':
            pass
        else:
            spans.append((label, [idx, idx]))
        prev_bmes_tag = bmes_tag
    return [(span[0], (span[1][0], span[1][1] + 1))
            for span in spans
            if span[0] not in ignore_labels
            ]


def _bioes_tag_to_spans(tags, ignore_labels=None):
    r"""
    给定一个tags的lis，比如['O', 'B-singer', 'I-singer', 'E-singer', 'O', 'O']。
    返回[('singer', (1, 4))] (左闭右开区间)

    :param tags: List[str],
    :param ignore_labels: List[str], 在该list中的label将被忽略
    :return: List[Tuple[str, List[int, int]]]. [(label，[start, end])]
    """
    ignore_labels = set(ignore_labels) if ignore_labels else set()

    spans = []
    prev_bioes_tag = None
    for idx, tag in enumerate(tags):
        tag = tag.lower()
        bioes_tag, label = tag[:1], tag[2:]
        if bioes_tag in ('b', 's'):
            spans.append((label, [idx, idx]))
        elif bioes_tag in ('i', 'e') and prev_bioes_tag in ('b', 'i') and label == spans[-1][0]:
            spans[-1][1][1] = idx
        elif bioes_tag == 'o':
            pass
        else:
            spans.append((label, [idx, idx]))
        prev_bioes_tag = bioes_tag
    return [(span[0], (span[1][0], span[1][1] + 1))
            for span in spans
            if span[0] not in ignore_labels
            ]


def _bio_tag_to_spans(tags, ignore_labels=None):
    r"""
    给定一个tags的lis，比如['O', 'B-singer', 'I-singer', 'I-singer', 'O', 'O']。
        返回[('singer', (1, 4))] (左闭右开区间)

    :param tags: List[str],
    :param ignore_labels: List[str], 在该list中的label将被忽略
    :return: List[Tuple[str, List[int, int]]]. [(label，[start, end])]
    """
    ignore_labels = set(ignore_labels) if ignore_labels else set()

    spans = []
    prev_bio_tag = None
    for idx, tag in enumerate(tags):
        tag = tag.lower()
        bio_tag, label = tag[:1], tag[2:]
        if bio_tag == 'b':
            spans.append((label, [idx, idx]))
        elif bio_tag == 'i' and prev_bio_tag in ('b', 'i') and label == spans[-1][0]:
            spans[-1][1][1] = idx
        elif bio_tag == 'o':  # o tag does not count
            pass
        else:
            spans.append((label, [idx, idx]))
        prev_bio_tag = bio_tag
    return [(span[0], (span[1][0], span[1][1] + 1)) for span in spans if span[0] not in ignore_labels]


def _get_encoding_type_from_tag_vocab(tag_vocab: Union[Vocabulary, dict]) -> str:
    r"""
    给定Vocabulary自动判断是哪种类型的encoding, 支持判断bmes, bioes, bmeso, bio

    :param tag_vocab: 支持传入tag Vocabulary; 或者传入形如{0:"O", 1:"B-tag1"}，即index在前，tag在后的dict。
    :return:
    """
    tag_set = set()
    unk_token = '<unk>'
    pad_token = '<pad>'
    if isinstance(tag_vocab, Vocabulary):
        unk_token = tag_vocab.unknown
        pad_token = tag_vocab.padding
        tag_vocab = tag_vocab.idx2word
    for idx, tag in tag_vocab.items():
        if tag in (unk_token, pad_token):
            continue
        tag = tag[:1].lower()
        tag_set.add(tag)

    bmes_tag_set = set('bmes')
    if tag_set == bmes_tag_set:
        return 'bmes'
    bio_tag_set = set('bio')
    if tag_set == bio_tag_set:
        return 'bio'
    bmeso_tag_set = set('bmeso')
    if tag_set == bmeso_tag_set:
        return 'bmeso'
    bioes_tag_set = set('bioes')
    if tag_set == bioes_tag_set:
        return 'bioes'
    raise RuntimeError("encoding_type cannot be inferred automatically. Only support "
                       "'bio', 'bmes', 'bmeso', 'bioes' type.")


def _check_tag_vocab_and_encoding_type(tag_vocab: Union[Vocabulary, dict], encoding_type: str):
    r"""
    检查vocab中的tag是否与encoding_type是匹配的

    :param tag_vocab: 支持传入tag Vocabulary; 或者传入形如{0:"O", 1:"B-tag1"}，即index在前，tag在后的dict。
    :param encoding_type: bio, bmes, bioes, bmeso
    :return:
    """
    tag_set = set()
    unk_token = '<unk>'
    pad_token = '<pad>'
    if isinstance(tag_vocab, Vocabulary):
        unk_token = tag_vocab.unknown
        pad_token = tag_vocab.padding
        tag_vocab = tag_vocab.idx2word
    for idx, tag in tag_vocab.items():
        if tag in (unk_token, pad_token):
            continue
        tag = tag[:1].lower()
        tag_set.add(tag)

    tags = encoding_type
    for tag in tag_set:
        assert tag in tags, f"{tag} is not a valid tag in encoding type:{encoding_type}. Please check your " \
                            f"encoding_type."
        tags = tags.replace(tag, '')  # 删除该值
    if tags:  # 如果不为空，说明出现了未使用的tag
        warnings.warn(f"Tag:{tags} in encoding type:{encoding_type} is not presented in your Vocabulary. Check your "
                      "encoding_type.")


class SpanFPreRecMetric(MetricBase):
    r"""
    在序列标注问题中，以span的方式计算F, pre, rec.
    比如中文Part of speech中，会以character的方式进行标注，句子 `中国在亚洲` 对应的POS可能为(以BMES为例)
    ['B-NN', 'E-NN', 'S-DET', 'B-NN', 'E-NN']。该metric就是为类似情况下的F1计算。
    最后得到的metric结果为::
    
        {
            'f': xxx, # 这里使用f考虑以后可以计算f_beta值
            'pre': xxx,
            'rec':xxx
        }
    
    若only_gross=False, 即还会返回各个label的metric统计值::
    
        {
            'f': xxx,
            'pre': xxx,
            'rec':xxx,
            'f-label': xxx,
            'pre-label': xxx,
            'rec-label':xxx,
            ...
        }
    """

    def __init__(self, tag_vocab, pred=None, target=None, seq_len=None, encoding_type=None, ignore_labels=None,
                 only_gross=True, f_type='micro', beta=1):
        r"""
        
        :param tag_vocab: 标签的 :class:`~fastNLP.Vocabulary` 。支持的标签为"B"(没有label)；或"B-xxx"(xxx为某种label，比如POS中的NN)，
            在解码时，会将相同xxx的认为是同一个label，比如['B-NN', 'E-NN']会被合并为一个'NN'.
        :param str pred: 用该key在evaluate()时从传入dict中取出prediction数据。 为None，则使用 `pred` 取数据
        :param str target: 用该key在evaluate()时从传入dict中取出target数据。 为None，则使用 `target` 取数据
        :param str seq_len: 用该key在evaluate()时从传入dict中取出sequence length数据。为None，则使用 `seq_len` 取数据。
        :param str encoding_type: 目前支持bio, bmes, bmeso, bioes。默认为None，通过tag_vocab自动判断.
        :param list ignore_labels: str 组成的list. 这个list中的class不会被用于计算。例如在POS tagging时传入['NN']，则不会计算'NN'个label
        :param bool only_gross: 是否只计算总的f1, precision, recall的值；如果为False，不仅返回总的f1, pre, rec, 还会返回每个label的f1, pre, rec
        :param str f_type: `micro` 或 `macro` . `micro` :通过先计算总体的TP，FN和FP的数量，再计算f, precision, recall; `macro` : 分布计算每个类别的f, precision, recall，然后做平均（各类别f的权重相同）
        :param float beta: f_beta分数， :math:`f_{beta} = \frac{(1 + {beta}^{2})*(pre*rec)}{({beta}^{2}*pre + rec)}` . 常用为 `beta=0.5, 1, 2` 若为0.5则精确率的权重高于召回率；若为1，则两者平等；若为2，则召回率权重高于精确率。
        """

        if not isinstance(tag_vocab, Vocabulary):
            raise TypeError("tag_vocab can only be fastNLP.Vocabulary, not {}.".format(type(tag_vocab)))
        if f_type not in ('micro', 'macro'):
            raise ValueError("f_type only supports `micro` or `macro`', got {}.".format(f_type))

        if encoding_type:
            encoding_type = encoding_type.lower()
            _check_tag_vocab_and_encoding_type(tag_vocab, encoding_type)
            self.encoding_type = encoding_type
        else:
            self.encoding_type = _get_encoding_type_from_tag_vocab(tag_vocab)

        if self.encoding_type == 'bmes':
            self.tag_to_span_func = _bmes_tag_to_spans
        elif self.encoding_type == 'bio':
            self.tag_to_span_func = _bio_tag_to_spans
        elif self.encoding_type == 'bmeso':
            self.tag_to_span_func = _bmeso_tag_to_spans
        elif self.encoding_type == 'bioes':
            self.tag_to_span_func = _bioes_tag_to_spans
        else:
            raise ValueError("Only support 'bio', 'bmes', 'bmeso', 'bioes' type.")

        self.ignore_labels = ignore_labels
        self.f_type = f_type
        self.beta = beta
        self.beta_square = self.beta ** 2
        self.only_gross = only_gross

        super().__init__()
        self._init_param_map(pred=pred, target=target, seq_len=seq_len)

        self.tag_vocab = tag_vocab

        self._true_positives = defaultdict(int)
        self._false_positives = defaultdict(int)
        self._false_negatives = defaultdict(int)

    def evaluate(self, pred, target, seq_len):
        r"""evaluate函数将针对一个批次的预测结果做评价指标的累计

        :param pred: [batch, seq_len] 或者 [batch, seq_len, len(tag_vocab)], 预测的结果
        :param target: [batch, seq_len], 真实值
        :param seq_len: [batch] 文本长度标记
        :return:
        """
        if not isinstance(pred, torch.Tensor):
            raise TypeError(f"`pred` in {_get_func_signature(self.evaluate)} must be torch.Tensor,"
                            f"got {type(pred)}.")
        if not isinstance(target, torch.Tensor):
            raise TypeError(f"`target` in {_get_func_signature(self.evaluate)} must be torch.Tensor,"
                            f"got {type(target)}.")

        if not isinstance(seq_len, torch.Tensor):
            raise TypeError(f"`seq_lens` in {_get_func_signature(self.evaluate)} must be torch.Tensor,"
                            f"got {type(seq_len)}.")

        if pred.size() == target.size() and len(target.size()) == 2:
            pass
        elif len(pred.size()) == len(target.size()) + 1 and len(target.size()) == 2:
            num_classes = pred.size(-1)
            pred = pred.argmax(dim=-1)
            if (target >= num_classes).any():
                raise ValueError("A gold label passed to SpanBasedF1Metric contains an "
                                 "id >= {}, the number of classes.".format(num_classes))
        else:
            raise RuntimeError(f"In {_get_func_signature(self.evaluate)}, when pred have "
                               f"size:{pred.size()}, target should have size: {pred.size()} or "
                               f"{pred.size()[:-1]}, got {target.size()}.")

        batch_size = pred.size(0)
        pred = pred.tolist()
        target = target.tolist()
        for i in range(batch_size):
            pred_tags = pred[i][:int(seq_len[i])]
            gold_tags = target[i][:int(seq_len[i])]

            pred_str_tags = [self.tag_vocab.to_word(tag) for tag in pred_tags]
            gold_str_tags = [self.tag_vocab.to_word(tag) for tag in gold_tags]

            pred_spans = self.tag_to_span_func(pred_str_tags, ignore_labels=self.ignore_labels)
            gold_spans = self.tag_to_span_func(gold_str_tags, ignore_labels=self.ignore_labels)

            for span in pred_spans:
                if span in gold_spans:
                    self._true_positives[span[0]] += 1
                    gold_spans.remove(span)
                else:
                    self._false_positives[span[0]] += 1
            for span in gold_spans:
                self._false_negatives[span[0]] += 1

    def get_metric(self, reset=True):
        r"""get_metric函数将根据evaluate函数累计的评价指标统计量来计算最终的评价结果."""
        evaluate_result = {}
        if not self.only_gross or self.f_type == 'macro':
            tags = set(self._false_negatives.keys())
            tags.update(set(self._false_positives.keys()))
            tags.update(set(self._true_positives.keys()))
            f_sum = 0
            pre_sum = 0
            rec_sum = 0
            for tag in tags:
                tp = self._true_positives[tag]
                fn = self._false_negatives[tag]
                fp = self._false_positives[tag]
                f, pre, rec = _compute_f_pre_rec(self.beta_square, tp, fn, fp)
                f_sum += f
                pre_sum += pre
                rec_sum += rec
                if not self.only_gross and tag != '':  # tag!=''防止无tag的情况
                    f_key = 'f-{}'.format(tag)
                    pre_key = 'pre-{}'.format(tag)
                    rec_key = 'rec-{}'.format(tag)
                    evaluate_result[f_key] = f
                    evaluate_result[pre_key] = pre
                    evaluate_result[rec_key] = rec

            if self.f_type == 'macro':
                evaluate_result['f'] = f_sum / len(tags)
                evaluate_result['pre'] = pre_sum / len(tags)
                evaluate_result['rec'] = rec_sum / len(tags)

        if self.f_type == 'micro':
            f, pre, rec = _compute_f_pre_rec(self.beta_square,
                                             sum(self._true_positives.values()),
                                             sum(self._false_negatives.values()),
                                             sum(self._false_positives.values()))
            evaluate_result['f'] = f
            evaluate_result['pre'] = pre
            evaluate_result['rec'] = rec

        if reset:
            self._true_positives = defaultdict(int)
            self._false_positives = defaultdict(int)
            self._false_negatives = defaultdict(int)

        for key, value in evaluate_result.items():
            evaluate_result[key] = round(value, 6)

        return evaluate_result


def _compute_f_pre_rec(beta_square, tp, fn, fp):
    r"""

    :param tp: int, true positive
    :param fn: int, false negative
    :param fp: int, false positive
    :return: (f, pre, rec)
    """
    pre = tp / (fp + tp + 1e-13)
    rec = tp / (fn + tp + 1e-13)
    f = (1 + beta_square) * pre * rec / (beta_square * pre + rec + 1e-13)

    return f, pre, rec


def _prepare_metrics(metrics):
    r"""

    Prepare list of Metric based on input
    :param metrics:
    :return: List[fastNLP.MetricBase]
    """
    _metrics = []
    if metrics:
        if isinstance(metrics, list):
            for metric in metrics:
                if isinstance(metric, type):
                    metric = metric()
                if isinstance(metric, MetricBase):
                    metric_name = metric.__class__.__name__
                    if not callable(metric.evaluate):
                        raise TypeError(f"{metric_name}.evaluate must be callable, got {type(metric.evaluate)}.")
                    if not callable(metric.get_metric):
                        raise TypeError(f"{metric_name}.get_metric must be callable, got {type(metric.get_metric)}.")
                    _metrics.append(metric)
                else:
                    raise TypeError(
                        f"The type of metric in metrics must be `fastNLP.MetricBase`, not `{type(metric)}`.")
        elif isinstance(metrics, MetricBase):
            _metrics = [metrics]
        else:
            raise TypeError(f"The type of metrics should be `list[fastNLP.MetricBase]` or `fastNLP.MetricBase`, "
                            f"got {type(metrics)}.")
    return _metrics


def _accuracy_topk(y_true, y_prob, k=1):
    r"""Compute accuracy of y_true matching top-k probable labels in y_prob.

    :param y_true: ndarray, true label, [n_samples]
    :param y_prob: ndarray, label probabilities, [n_samples, n_classes]
    :param k: int, k in top-k
    :returns acc: accuracy of top-k

    """
    y_pred_topk = np.argsort(y_prob, axis=-1)[:, -1:-k - 1:-1]
    y_true_tile = np.tile(np.expand_dims(y_true, axis=1), (1, k))
    y_match = np.any(y_pred_topk == y_true_tile, axis=-1)
    acc = np.sum(y_match) / y_match.shape[0]
    return acc


def _pred_topk(y_prob, k=1):
    r"""Return top-k predicted labels and corresponding probabilities.

    :param y_prob: ndarray, size [n_samples, n_classes], probabilities on labels
    :param k: int, k of top-k
    :returns (y_pred_topk, y_prob_topk):
        y_pred_topk: ndarray, size [n_samples, k], predicted top-k labels
        y_prob_topk: ndarray, size [n_samples, k], probabilities for top-k labels

    """
    y_pred_topk = np.argsort(y_prob, axis=-1)[:, -1:-k - 1:-1]
    x_axis_index = np.tile(
        np.arange(len(y_prob))[:, np.newaxis],
        (1, k))
    y_prob_topk = y_prob[x_axis_index, y_pred_topk]
    return y_pred_topk, y_prob_topk


class CMRC2018Metric(MetricBase):
    r"""
    CRMC2018任务的评价metric
    """
    def __init__(self, answers=None, raw_chars=None, context_len=None, pred_start=None, pred_end=None):
        super().__init__()
        self._init_param_map(answers=answers, raw_chars=raw_chars, context_len=context_len, pred_start=pred_start,
                             pred_end=pred_end)
        self.em = 0
        self.total = 0
        self.f1 = 0

    def evaluate(self, answers, raw_chars, pred_start, pred_end, context_len=None):
        r"""

        :param list[str] answers: 如[["答案1", "答案2", "答案3"], [...], ...]
        :param list[str] raw_chars: [["这", "是", ...], [...]]
        :param tensor pred_start: batch_size x length 或 batch_size,
        :param tensor pred_end: batch_size x length 或 batch_size(是闭区间，包含end位置),
        :param tensor context_len: context长度, batch_size
        :return:
        """
        if pred_start.dim() > 1:
            batch_size, max_len = pred_start.size()
            context_mask = seq_len_to_mask(context_len, max_len=max_len).eq(False)
            pred_start.masked_fill_(context_mask, float('-inf'))
            pred_end.masked_fill_(context_mask, float('-inf'))
            max_pred_start, pred_start_index = pred_start.max(dim=-1, keepdim=True)  # batch_size,
            pred_start_mask = pred_start.eq(max_pred_start).cumsum(dim=-1).eq(0)  # 只能预测这之后的值
            pred_end.masked_fill_(pred_start_mask, float('-inf'))
            pred_end_index = pred_end.argmax(dim=-1) + 1
        else:
            pred_start_index = pred_start
            pred_end_index = pred_end + 1
        pred_ans = []
        for index, (start, end) in enumerate(zip(pred_start_index.flatten().tolist(), pred_end_index.tolist())):
            pred_ans.append(''.join(raw_chars[index][start:end]))
        for answer, pred_an in zip(answers, pred_ans):
            pred_an = pred_an.strip()
            self.f1 += _calc_cmrc2018_f1_score(answer, pred_an)
            self.total += 1
            self.em += _calc_cmrc2018_em_score(answer, pred_an)

    def get_metric(self, reset=True):
        eval_res = {'f1': round(self.f1 / self.total*100, 2), 'em': round(self.em / self.total*100, 2)}
        if reset:
            self.em = 0
            self.total = 0
            self.f1 = 0
        return eval_res

# split Chinese
def _cn_segmentation(in_str, rm_punc=False):
    in_str = str(in_str).lower().strip()
    segs_out = []
    temp_str = ""
    sp_char = {'-', ':', '_', '*', '^', '/', '\\', '~', '`', '+', '=', '，', '。', '：', '？', '！', '“', '”', '；', '’', '《',
               '》', '……', '·', '、', '「', '」', '（', '）', '－', '～', '『', '』'}
    for char in in_str:
        if rm_punc and char in sp_char:
            continue
        if re.search(r'[\u4e00-\u9fa5]', char) or char in sp_char:
            if temp_str != "":
                ss = list(temp_str)
                segs_out.extend(ss)
                temp_str = ""
            segs_out.append(char)
        else:
            temp_str += char

    # handling last part
    if temp_str != "":
        ss = list(temp_str)
        segs_out.extend(ss)

    return segs_out


# remove punctuation
def _remove_punctuation(in_str):
    in_str = str(in_str).lower().strip()
    sp_char = ['-', ':', '_', '*', '^', '/', '\\', '~', '`', '+', '=',
               '，', '。', '：', '？', '！', '“', '”', '；', '’', '《', '》', '……', '·', '、',
               '「', '」', '（', '）', '－', '～', '『', '』']
    out_segs = []
    for char in in_str:
        if char in sp_char:
            continue
        else:
            out_segs.append(char)
    return ''.join(out_segs)


# find longest common string
def _find_lcs(s1, s2):
    m = [[0 for i in range(len(s2) + 1)] for j in range(len(s1) + 1)]
    mmax = 0
    p = 0
    for i in range(len(s1)):
        for j in range(len(s2)):
            if s1[i] == s2[j]:
                m[i + 1][j + 1] = m[i][j] + 1
                if m[i + 1][j + 1] > mmax:
                    mmax = m[i + 1][j + 1]
                    p = i + 1
    return s1[p - mmax:p], mmax


def _calc_cmrc2018_f1_score(answers, prediction):
    f1_scores = []
    for ans in answers:
        ans_segs = _cn_segmentation(ans, rm_punc=True)
        prediction_segs = _cn_segmentation(prediction, rm_punc=True)
        lcs, lcs_len = _find_lcs(ans_segs, prediction_segs)
        if lcs_len == 0:
            f1_scores.append(0)
            continue
        precision = 1.0 * lcs_len / len(prediction_segs)
        recall = 1.0 * lcs_len / len(ans_segs)
        f1 = (2 * precision * recall) / (precision + recall)
        f1_scores.append(f1)
    return max(f1_scores)


def _calc_cmrc2018_em_score(answers, prediction):
    em = 0
    for ans in answers:
        ans_ = _remove_punctuation(ans)
        prediction_ = _remove_punctuation(prediction)
        if ans_ == prediction_:
            em = 1
            break
    return em
