# Supplementary material
Source: ML conference proceedings conference paper supplement (https://proceedings.neurips.cc/paper_files/paper/2022/hash/0f5fcf4bff73a3537e0813a38f0d3f76-Abstract.html)
Supplement: Supplementary file 1 [file 0f5fcf4bff73a3537e0813a38f0d3f76-Supplemental-Conference.zip › supplemental/transformers/fastNLP/core/trainer.py]

r"""
Trainer在fastNLP中用于组织单任务的训练过程，可以避免用户在不同训练任务中重复撰以下步骤的代码

    (1) epoch循环;
    
    (2) 将数据分成不同的Batch;
    
    (3) 对Batch进行pad;
    
    (4) 每个epoch结束或一定step后进行验证集验证;
    
    (5) 保存获得更好验证性能的模型。


----------------------------
1. Trainer的基本使用
----------------------------

下面的例子是使用神经网络来进行预测一个序列中是否有偶数个1。

.. code-block:: python

    import numpy as np
    from torch import nn
    import torch
    import torch.nn.functional as F
    from torch.optim import SGD

    from fastNLP import DataSet
    from fastNLP import Trainer
    from fastNLP import CrossEntropyLoss
    from fastNLP import AccuracyMetric
    from fastNLP.modules.decoder import MLP

    # 模型
    class Model(nn.Module):
        def __init__(self, input_num):
            super().__init__()
            self.fcs = MLP([input_num, 40, 40, 2], 'relu')

        def forward(self, x):
            x = self.fcs(x)
            return {'pred': x}
    model = Model(10)

    # 生成数据
    def generate_psedo_dataset(num_samples):
        dataset = DataSet()
        data = np.random.randint(2, size=(num_samples, 10))
        label = np.sum(data, axis=1)%2
        dataset = DataSet({'x':data.astype(float), 'label': label})
        dataset.set_input('x')
        dataset.set_target('label')
        return dataset
    tr_dataset = generate_psedo_dataset(1000)
    dev_data = generate_psedo_dataset(100)

    # 训练
    trainer = Trainer(tr_dataset, model, loss=CrossEntropyLoss(target='label'),
                       optimizer=SGD(model.parameters(), lr=0.1),n_epochs=1000,
                       dev_data = dev_data, metrics=AccuracyMetric(target='label'))
    trainer.train()

由上面的例子可以看出通过使用Trainer，可以使得训练部分的代码大幅减少。
使用Trainer需要满足以下几个条件:

1.1 模型
----------------------------

1 模型的forward()的参数名需要与DataSet中的名字对应。实际上fastNLP在将DataSet中的数据传递给模型forward()时，是
通过匹配名称实现的。所以上例中，如果Model的forward函数修改为forward(self, data), 则DataSet中的'x'这个field就应该
改名为'data'。

2 传递给forward()的参数是DataSet中被设置为input的那些field。但如果forward()中没有对应的参数，则不会将数据传递
给forward()。例如，DataSet中'x1', 'x2'都是input，但是模型的函数为forward(self, x1), 那么'x2'不会传递给forward()。

3 模型的forward()返回值需要为一个dict。

1.2 Loss
----------------------------

fastNLP中的为了不限制forward函数的返回内容数量(比如一些复杂任务需要返回多个内容，如Dependency Parsing，
:mod:`Loss<fastNLP.core.losses>` 与 :mod:`Metric<fastNLP.core.metrics>` 都使用了通过名称来匹配相应内容的策略。如上面的例子中

.. code-block:: python

    trainer = Trainer(tr_dataset, model, loss=CrossEntropyLoss(target='label'),
               optimizer=SGD(model.parameters(), lr=0.1),n_epochs=1000,
               dev_data = dev_data, metrics=AccuracyMetric(target='label'))

loss被设置为了 :class:`~fastNLP.CrossEntropyLoss` , 但在初始化的时候传入了target='label'这个参数，
:class:`~fastNLP.CrossEntropyLoss` 的初始化参数为(pred=None, target=None, padding_idx=-100)。

这里的两个参数分别为计算CrossEntropy时需要使用到的模型的预测值与真实值。
其中 `pred` 一般来自于模型forward()的返回结果，`target` 一般是来自于DataSet中被设置为target的field。
由于每个人对真实值或者model的返回值取名并不一样，所以fastNLP的 :mod:`Loss<fastNLP.core.losses>` 提供一种类似于映射的机制来匹配对应的值，
比如这里 :class:`~fastNLP.CrossEntropyLoss` 将尝试找到名为'label'的内容来作为真实值得到loss；
而pred=None, 则 :class:`~fastNLP.CrossEntropyLoss` 使用'pred'作为名称匹配预测值，
正好forward的返回值也叫pred，所以这里不需要申明pred。

尽管fastNLP使用了映射机制来使得loss的计算变得比较灵活，但有些情况下loss必须在模型中进行计算，比如使用了CRF的模型。
fastNLP中提供了 :class:`~fastNLP.LossInForward` 这个loss。
这个loss的原理是直接在forward()的返回结果中找到loss_key(默认寻找'loss')指定的那个tensor，并使用它作为loss。
如果Trainer初始化没有提供loss则默认使用 :class:`~fastNLP.LossInForward` 。

.. todo::
    补充一个例子  详细例子可以参照

1.3 Metric
----------------------------

:mod:`Metric<fastNLP.core.metrics>` 使用了与上述Loss一样的策略，即使用名称进行匹配。
AccuracyMetric(target='label')的情况与CrossEntropyLoss 是同理的。

在进行验证时，可能用到的计算与forward()中不太一致，没有办法直接从forward()的结果中得到预测值，这时模型可以提供一个predict()方法，
如果提供的模型具有predict方法，则在模型验证时将调用predict()方法获取预测结果，
传入到predict()的参数也是从DataSet中被设置为input的field中选择出来的;
与forward()一样，返回值需要为一个dict。

.. todo::
    补充一个例子 具体例子可以参考
    
----------------------------
2. Trainer的代码检查
----------------------------

由于在fastNLP中采取了映射的机制，所以难免可能存在对应出错的情况。Trainer提供一种映射检查机制，可以通过check_code_level来进行控制
比如下面的例子中，由于各种原因产生的报错

Example2.1
----------------------------

.. code-block:: python

    import numpy as np
    from torch import nn
    import torch
    from torch.optim import SGD
    from fastNLP import Trainer
    from fastNLP import DataSet

    class Model(nn.Module):
        def __init__(self):
            super().__init__()
            self.fc = nn.Linear(1, 1)
        def forward(self, x, b):
            loss = torch.mean((self.fc(x)-b)**2)
            return {'loss': loss}
    model = Model()

    dataset = DataSet({'a': np.arange(10), 'b':np.arange(10)*2})
    dataset.set_input('a', 'b')

    trainer = Trainer(dataset, model, loss=None, optimizer=SGD(model.parameters(), lr=0.001))

    trainer = Trainer(dataset, model, SGD(model.parameters()))
    #  会报以下的错误
    # input fields after batch(if batch size is 2):
    #     a: (1)type:torch.Tensor (2)dtype:torch.int64, (3)shape:torch.Size([2])
    #     b: (1)type:torch.Tensor (2)dtype:torch.int64, (3)shape:torch.Size([2])
    # There is no target field.
    # ....
    # NameError:
    # Problems occurred when calling Model.forward(self, x, b)
    #     missing param: ['x']
    #     unused field: ['a']
    #     Suggestion: You need to provide ['x'] in DataSet and set it as input.

这里就是由于在Trainer初始化的时候，fastNLP会尝试使用一个batch_size=2的batch去运行一遍forward()以及backward()。这里有两类
信息可以为你提供参考

1 'input fields after batch...'这部分显示的是train dataset经过Batch操作后，每个field对应的类型以及进行shape。这里
因为train dataset没有target所以没有显示。根据这里可以看出是否正确将需要的内容设置为了input或target。

2 NameError，NameError发生在映射出错的情况。这里报错的原因是由于尝试进行forward计算时(可以通过Model.forward(self, x, b)判断
出当前是在调取forward)，却没有获取到forward()函数中需要的'x'；在报错信息中同时指出了缺'x'，而'a'没有被使用，那么可能
就是由于field的名称不对。这里将dataset中'a'这个field的名称改为'x'，或者model的参数从'x'修改为'a'都可以解决问题。

下面的例子是由于loss计算的时候找不到需要的值

Example2.2
----------------------------

.. code-block:: python

    import numpy as np
    from torch import nn
    from torch.optim import SGD
    from fastNLP import Trainer
    from fastNLP import DataSet
    from fastNLP import L1Loss
    import torch

    class Model(nn.Module):
        def __init__(self):
            super().__init__()
            self.fc = nn.Linear(1, 1)
        def forward(self, a):
            return {'pred_b': self.fc(a.unsqueeze(1)).squeeze(1), 'No use':1}

    model = Model()

    dataset = DataSet({'a': np.arange(10, dtype=float), 'b':np.arange(10, dtype=float)*2})

    dataset.set_input('a')
    dataset.set_target('b')

    trainer = Trainer(dataset, model, loss=L1Loss(target='label'), optimizer=SGD(model.parameters(), lr=0.001))
    # 报错信息如下
    # input fields after batch(if batch size is 2):
    #     a: (1)type:torch.Tensor (2)dtype:torch.float32, (3)shape:torch.Size([2])
    # target fields after batch(if batch size is 2):
    #     b: (1)type:torch.Tensor (2)dtype:torch.float32, (3)shape:torch.Size([2])
    # ....
    # NameError:
    # Problems occurred when calling L1Loss.get_loss(self, pred, target)
    #     missing param: ['pred(assign to `pred` in `L1Loss`)', 'label(assign to `target` in `L1Loss`)']
    #     unused field: ['b']
    #     unused param: ['pred_b', 'No use']
    #     target field: ['b']
    #     param from Model.forward(self, a): ['pred_b', 'No use']
    #     Suggestion: (1). Check key assignment for `target` when initialize L1Loss. Or provide `label` in DataSet or output of Model.forward(self, a).
    #             (2). Check key assignment for `pred` when initialize L1Loss. Or provide `pred` in DataSet or output of Model.forward(self, a).

报错信息也包含两部分:

1 第一部分与上面是一样的

2 这里报错的原因是由于计算loss的时候找不到相应的值(通过L1Loss.get_loss(self, pred, target)判断出来的)；
报错的原因是因为 `pred` 和 `label` (我们在初始化L1Loss时将target指定为了label)都没有找到。
这里'unused field'是DataSet中出现了，但却没有被设置为input或者target的field；
'unused param'是forward()中返回且没有被使用到的内容；'target field'是被设置为了target的field;
'param from Model.forward(self, a)'是forward()返回的所有key。"Suggestion"是关于当前错误处理的建议。

但是在一些情况下，比如forward()返回值只有一个，target也只有一个，fastNLP不会进行匹配，而直接将forward()的结果作为pred,
将DataSet中的target设置为target。上面的例子在返回值中加入了一个'No use'则只是为了使得Loss去匹配结果。


下面是带有dev dataset时如果出现错误会发生的报错，

Example2.3
----------------------------

.. code-block:: python

    import numpy as np
    from torch import nn
    from torch.optim import SGD
    from fastNLP import Trainer
    from fastNLP import DataSet
    from fastNLP import AccuracyMetric
    import torch

    class Model(nn.Module):
        def __init__(self):
            super().__init__()
            self.fc = nn.Linear(1, 1)
        def forward(self, a, b):
            loss = torch.mean((self.fc(a.float().unsqueeze(1))-b.float())**2)
            return {'loss': loss}
        def predict(self, a):  # 使用predict()进行验证
            return {'output':self.fc(a.float().unsqueeze(1))} #这里return的值不包含'pred'这个key
    model = Model()

    dataset = DataSet({'a': np.arange(10), 'b':np.arange(10)*2})
    dev_data = DataSet({'a': np.arange(10, 20), 'b':np.arange(10, 20)*2})

    dataset.set_input('a', 'b')
    dev_data.set_input('a')  # 这里没有设置target

    trainer = Trainer(dataset, model, loss=None, optimizer=SGD(model.parameters(), lr=0.001),
                     dev_data=dev_data, metrics=AccuracyMetric())

    # 报错信息
    # ...
    # NameError:
    # Problems occurred when calling AccuracyMetric.evaluate(self, pred, target, seq_len=None)
    #     missing param: ['pred(assign to `pred` in `AccuracyMetric`)', 'target(assign to `target` in `AccuracyMetric`)']
    #     unused param: ['output']
    #     target field: []
    #     param from Model.predict(self, a): ['output']
    #     Suggestion: (1). Check key assignment for `pred` when initialize AccuracyMetric. Or provide `pred` in DataSet or output of Model.predict(self, a).
    #             (2). Check key assignment for `target` when initialize AccuracyMetric. Or provide `target` in DataSet or output of Model.predict(self, a).

报错信息和前面都是类似的，但是可以通过'AccuracyMetric.evaluate(self, pred, target, seq_len=None)'看出这里是evaluation
的时候发生了错误。这样避免了需要在完成一整个epoch的训练才能发现evaluation弄错的情况。这里的修改是通过在初始化metric的时候
指明通过'output'获取`pred`, 即AccuracyMetric(pred='output')。

可以通过check_code_level调节检查的强度。默认为0，即进行检查。

----------------------------
3. Trainer与callback
----------------------------

虽然Trainer本身已经集成了一些功能，但仍然不足以囊括训练过程中可能需要到的功能，比如负采样，learning rate decay, Early Stop等。
为了解决这个问题fastNLP引入了callback的机制，:class:`~fastNLP.Callback` 是一种在Trainer训练过程中特定阶段会运行的函数集合，
所有的 :class:`~fastNLP.Callback` 都具有on_*(比如on_train_start, on_backward_begin)等函数。
如果 Callback 实现了该函数，则Trainer运行至对应阶段，会进行调用，例如::

    from fastNLP import Callback, EarlyStopCallback, Trainer, CrossEntropyLoss, AccuracyMetric
    from fastNLP.models import CNNText

    start_time = time.time()
    
    class MyCallback(Callback):
        def on_epoch_end(self):
            print('{:d}ms\n\n'.format(round((time.time()-start_time)*1000)))
    
    model = CNNText((len(vocab),50), num_classes=5, padding=2, dropout=0.1)
    trainer = Trainer(model=model, train_data=train_data, dev_data=dev_data, loss=CrossEntropyLoss(),
                      metrics=AccuracyMetric(), callbacks=[MyCallback(),EarlyStopCallback(10)])
    trainer.train()
    
这里，我们通过继承 :class:`~fastNLP.Callback` 类定义了自己的 callback 的，并和内置的 :class:`~fastNLP.EarlyStopCallback`
一起传给了 :class:`~fastNLP.Trainer` ，增强了 :class:`~fastNLP.Trainer` 的功能

fastNLP已经自带了很多callback函数供使用，可以参考 :mod:`fastNLP.core.callback` 。

"""
__all__ = [
    "Trainer"
]

import os
import time
from datetime import datetime, timedelta

import numpy as np
import torch
import torch.nn as nn

try:
    from tqdm.auto import tqdm
except:
    from .utils import _pseudo_tqdm as tqdm
import warnings

from .batch import DataSetIter, BatchIter
from .callback import CallbackManager, CallbackException, Callback
from .dataset import DataSet
from .losses import _prepare_losser
from .metrics import _prepare_metrics
from .optimizer import Optimizer
from .sampler import Sampler
from .sampler import RandomSampler
from .tester import Tester
from .utils import _CheckError
from .utils import _build_args
from .utils import _check_forward_error
from .utils import _check_loss_evaluate
from .utils import _move_dict_value_to_device
from .utils import _get_func_signature
from .utils import _get_model_device
from .utils import _move_model_to_device
from ._parallel_utils import _model_contains_inner_module
from ._logger import logger


class Trainer(object):
    r"""
    Trainer在fastNLP中用于组织单任务的训练过程，可以避免用户在不同训练任务中重复撰写
        (1) epoch循环;
        (2) 将数据分成不同的Batch;
        (3) 对Batch进行pad;
        (4) 每个epoch结束或一定step后进行验证集验证;
        (5) 保存获得更好验证性能的模型等。
    
    详细的介绍参见 :mod:`fastNLP.core.trainer`
    """
    
    def __init__(self, train_data, model, optimizer=None, loss=None,
                 batch_size=32, sampler=None, drop_last=False, update_every=1,
                 num_workers=0, n_epochs=10, print_every=5,
                 dev_data=None, metrics=None, metric_key=None,
                 validate_every=-1, save_path=None, use_tqdm=True, device=None,
                 callbacks=None, check_code_level=0, **kwargs):
        r"""
        :param train_data: 训练集， :class:`~fastNLP.DataSet` 类型或 :class:`~fastNLP.BatchIter` 的子类
        :param nn.modules model: 待训练的模型
        :param optimizer: `torch.optim.Optimizer` 优化器。如果为None，则Trainer使用默认的Adam(model.parameters(), lr=4e-3)这个优化器
        :param int batch_size: 训练和验证的时候的batch大小。
        :param loss: 使用的 :class:`~fastNLP.core.losses.LossBase` 对象。当为None时，默认使用 :class:`~fastNLP.LossInForward`
        :param sampler: Batch数据生成的顺序， :class:`~fastNLP.Sampler` 类型。如果为None，默认使用 :class:`~fastNLP.RandomSampler`
        :param drop_last: 如果最后一个batch没有正好为batch_size这么多数据，就扔掉最后一个batch
        :param num_workers: int, 有多少个线程来进行数据pad处理。
        :param update_every: int, 多少步更新一次梯度。用于希望累计梯度的场景，比如需要128的batch_size, 但是直接设为128
            会导致内存不足，通过设置batch_size=32, update_every=4达到目的。当optimizer为None时，该参数无效。
        :param int n_epochs: 需要优化迭代多少次。
        :param int print_every: 多少次反向传播更新tqdm显示的loss; 如果use_tqdm=False, 则多少次反向传播打印loss。
        :param dev_data: 用于做验证的DataSet， :class:`~fastNLP.DataSet` 类型。
        :param metrics: 验证的评估函数。可以只使用一个 :class:`Metric<fastNLP.core.metrics.MetricBase>` ，
            也可以使用多个 :class:`Metric<fastNLP.core.metrics.MetricBase>` ，通过列表传入。
            如验证时取得了更好的验证结果(如果有多个Metric，以列表中第一个Metric为准)，且save_path不为None，
            则保存当前模型。Metric种类详见 :mod:`metrics模块 <fastNLP.core.metrics>` 。仅在传入dev_data时有效。
        :param str,None metric_key:  :class:`Metric<fastNLP.core.metrics.MetricBase>` 有时会有多个指标，
            比如 :class:`~fastNLP.core.metrics.SpanFPreRecMetric` 中包含了'f', 'pre', 'rec'。此时需
            要指定以哪个指标为准。另外有些指标是越小效果越好，比如语言模型的困惑度，这种情况下，在key前面增加一个'-'来表
            明验证时，值越小越好(比如: "-ppl")。仅在传入dev_data时有效。
        :param int validate_every: 多少个step在验证集上验证一次; 如果为-1，则每个epoch结束验证一次。仅在传入dev_data时有效。
        :param str,None save_path: 将模型保存路径，如果路径不存在，将自动创建文件夹。如果为None，则不保存模型。如果dev_data为None，则保存
            最后一次迭代的模型。保存的时候不仅保存了参数，还保存了模型结构。即便使用DataParallel，这里也只保存模型。
        :param bool use_tqdm: 是否使用tqdm来显示训练进度; 如果为False，则将loss打印在终端中。
        :param str,int,torch.device,list(int) device: 将模型load到哪个设备。默认为None，即Trainer不对模型
            的计算位置进行管理。支持以下的输入:
    
            1. str: ['cpu', 'cuda', 'cuda:0', 'cuda:1', ...] 依次为'cpu'中, 可见的第一个GPU中, 可见的第一个GPU中,
            可见的第二个GPU中;
    
            2. torch.device：将模型装载到torch.device上。
    
            3. int: 将使用device_id为该值的gpu进行训练
    
            4. list(int)：如果多于1个device，将使用torch.nn.DataParallel包裹model, 并使用传入的device。
    
            5. None. 为None则不对模型进行任何处理，如果传入的model为torch.nn.DataParallel该值必须为None。
    
            已知可能会出现的问题：Adagrad优化器可能无法正常使用这个参数，请手动管理模型位置。
    
        :param list(callbacks) callbacks: 用于在train过程中起调节作用的回调函数。比如early stop，negative sampling等可以
            通过callback机制实现。 可使用的callback参见 :mod:`callback模块 <fastNLP.core.callback>`
        :param int check_code_level: 模型检查等级. -1: 不进行检查; 0: 仅出现错误时停止; 1: 如果有field没有被使用，
            报告警告信息; 2: 有任何field没有被使用都报错. 检查的原理是通过使用很小的batch(默认2个sample)来运行代码，但是
            这个过程理论上不会修改任何参数，只是会检查能否运行。但如果(1)模型中存在将batch_size写为某个固定值的情况；
            (2)模型中存在累加前向计算次数的，可能会多计算1次。以上情况建议将check_code_level设置为-1。
        :param kwargs: 支持配置可选参数
            bool test_use_tqdm: 在dev上验证的时候是否开启tqdm
            Sampler test_sampler: 在evaluate的时候使用的sampler
        """
        super(Trainer, self).__init__()
        if not isinstance(model, nn.Module):
            raise TypeError(f"The type of model must be torch.nn.Module, got {type(model)}.")

        # check metrics and dev_data
        if (not metrics) and dev_data is not None:
            raise ValueError("No metric for dev_data evaluation.")
        if metrics and (dev_data is None):
            raise ValueError("No dev_data for evaluations, pass dev_data or set metrics to None. ")

        # check update every
        assert update_every >= 1, "update_every must be no less than 1."
        self.update_every = int(update_every)

        # check save_path
        if not (save_path is None or isinstance(save_path, str)):
            raise ValueError("save_path can only be None or `str`.")
        # prepare evaluate
        metrics = _prepare_metrics(metrics)

        # parse metric_key
        # increase_better is True. It means the exp result gets better if the indicator increases.
        # It is true by default.
        self.increase_better = True
        if metric_key is not None:
            self.increase_better = False if metric_key[0] == "-" else True
            self.metric_key = metric_key[1:] if metric_key[0] == "+" or metric_key[0] == "-" else metric_key
        else:
            self.metric_key = None
        # prepare loss
        losser = _prepare_losser(loss)

        if isinstance(train_data, BatchIter):
            if sampler is not None:
                warnings.warn("sampler is ignored when train_data is a BatchIter.")
            if num_workers>0:
                warnings.warn("num_workers is ignored when train_data is BatchIter.")
            if drop_last:
                warnings.warn("drop_last is ignored when train_data is BatchIter.")

        if isinstance(model, nn.parallel.DistributedDataParallel):  # 如果是分布式的
            # device为None
            if device is not None:
                warnings.warn("device is ignored when model is nn.parallel.DistributedDataParallel.")
                device = None
            # Sampler要是分布式的
            if sampler is None:
                sampler = torch.utils.data.DistributedSampler(train_data)
            elif not isinstance(sampler, torch.utils.data.DistributedSampler):
                raise TypeError("When using nn.parallel.DistributedDataParallel, "
                                "sampler must be None or torch.utils.data.DistributedSampler.")
            # 不能保存模型
            if save_path:
                raise RuntimeError("Saving model in Distributed situation is not allowed right now.")
        else:
            # sampler check
            if sampler is not None and not isinstance(sampler, (Sampler, torch.utils.data.Sampler)):
                raise ValueError(f"The type of sampler should be fastNLP.BaseSampler or pytorch's Sampler, got {type(sampler)}")
            if sampler is None:
                sampler = RandomSampler()
            elif hasattr(sampler, 'set_batch_size'):
                sampler.set_batch_size(batch_size)

        if isinstance(train_data, DataSet):
            self.data_iterator = DataSetIter(dataset=train_data, batch_size=batch_size, sampler=sampler,
                                             num_workers=num_workers, drop_last=drop_last)
        elif isinstance(train_data, BatchIter):
            self.data_iterator = train_data
            train_data = train_data.dataset
            check_code_level = -1  # 强制跳过校验
        else:
            raise TypeError("train_data type {} not support".format(type(train_data)))

        model.train()
        self.model = _move_model_to_device(model, device=device)
        if _model_contains_inner_module(self.model):
            self._forward_func = self.model.module.forward
        else:
            self._forward_func = self.model.forward
        if check_code_level > -1:
            # _check_code 是 fastNLP 帮助你检查代码是否正确的方法 。如果你在错误栈中看到这行注释，请认真检查你的field名与模型的输入
            #   名是否匹配
            dev_dataset = dev_data
            if isinstance(dev_data, BatchIter):
                dev_dataset = None
                warnings.warn("dev_data is of BatchIter type, ignore validation checking.")
            check_batch_size = min(batch_size, DEFAULT_CHECK_BATCH_SIZE)
            if isinstance(self.model, nn.DataParallel):
                _num_devices = len(self.model.device_ids)
                if batch_size//_num_devices>1:  # 如果多卡是每个卡可以分多个数据的，则用每个卡给两个sample
                    check_batch_size = max(len(self.model.device_ids)*2, check_batch_size)
                else:
                    check_batch_size = max(len(self.model.device_ids), check_batch_size)
            _check_code(dataset=train_data, model=self.model, losser=losser, forward_func=self._forward_func, metrics=metrics,
                        dev_data=dev_dataset, metric_key=self.metric_key, check_level=check_code_level,
                        batch_size=check_batch_size)

        self.train_data = train_data
        self.dev_data = dev_data  # If None, No validation.
        self.losser = losser
        self.metrics = metrics
        self.n_epochs = int(n_epochs)
        self.batch_size = int(batch_size)
        self.save_path = save_path
        self.print_every = int(print_every)
        self.validate_every = int(validate_every) if validate_every != 0 else -1
        self.best_metric_indicator = None
        self.best_dev_epoch = None
        self.best_dev_step = None
        self.best_dev_perf = None
        self.n_steps = len(self.data_iterator) * self.n_epochs

        if isinstance(optimizer, torch.optim.Optimizer):
            self.optimizer = optimizer
        elif isinstance(optimizer, Optimizer):
            self.optimizer = optimizer.construct_from_pytorch(self.model.parameters())
        elif optimizer is None:
            self.optimizer = torch.optim.Adam(self.model.parameters(), lr=4e-3)
        else:
            raise TypeError("optimizer can only be torch.optim.Optimizer type, not {}.".format(type(optimizer)))

        self.logger = logger

        self.use_tqdm = use_tqdm
        if 'test_use_tqdm' in kwargs:
            self.test_use_tqdm = kwargs.get('test_use_tqdm')
        else:
            self.test_use_tqdm = self.use_tqdm
        self.pbar = None
        self.print_every = abs(self.print_every)
        self.kwargs = kwargs
        if self.dev_data is not None:
            self.tester = Tester(model=self.model,
                                 data=self.dev_data,
                                 metrics=self.metrics,
                                 batch_size=kwargs.get("dev_batch_size", self.batch_size),
                                 device=None,  # 由上面的部分处理device
                                 verbose=0,
                                 use_tqdm=self.test_use_tqdm,
                                 sampler=kwargs.get('test_sampler', None))

        self.start_time = None  # start timestamp

        if isinstance(callbacks, Callback):
            callbacks = [callbacks]

        self.callback_manager = CallbackManager(env={"trainer": self},
                                                callbacks=callbacks)

    def train(self, load_best_model=True, on_exception='auto'):
        r"""
        使用该函数使Trainer开始训练。

        :param bool load_best_model: 该参数只有在初始化提供了dev_data的情况下有效，如果True, trainer将在返回之前重新加载dev表现
                最好的模型参数。
        :param str on_exception: 在训练过程遭遇exception，并被 :py:class:Callback 的on_exception()处理后，是否继续抛出异常。
                支持'ignore','raise', 'auto': 'ignore'将捕获异常，写在Trainer.train()后面的代码将继续运行; 'raise'将异常抛出;
                'auto'将ignore以下两种Exception: CallbackException与KeyboardInterrupt, raise其它exception.
        :return dict: 返回一个字典类型的数据,
                内含以下内容::

                    seconds: float, 表示训练时长
                    以下三个内容只有在提供了dev_data的情况下会有。
                    best_eval: Dict of Dict, 表示evaluation的结果。第一层的key为Metric的名称，
                                第二层的key为具体的Metric
                    best_epoch: int，在第几个epoch取得的最佳值
                    best_step: int, 在第几个step(batch)更新取得的最佳值

        """
        results = {}
        if self.n_epochs <= 0:
            self.logger.info(f"training epoch is {self.n_epochs}, nothing was done.")
            results['seconds'] = 0.
            return results
        try:
            self._model_device = _get_model_device(self.model)
            self._mode(self.model, is_test=False)
            self._load_best_model = load_best_model
            # 加上millsecond，防止两个太接近的保存
            self.start_time = str(datetime.now().strftime('%Y-%m-%d-%H-%M-%S-%f'))
            start_time = time.time()
            self.logger.info("training epochs started " + self.start_time)
            self.step = 0
            self.epoch = 1
            try:
                self.callback_manager.on_train_begin()
                self._train()
                self.callback_manager.on_train_end()

            except BaseException as e:
                self.callback_manager.on_exception(e)
                if on_exception == 'auto':
                    if not isinstance(e, (CallbackException, KeyboardInterrupt)):
                        raise e
                elif on_exception == 'raise':
                    raise e

            if self.dev_data is not None and self.best_dev_perf is not None and load_best_model:
                model_name = "best_" + "_".join([self.model.__class__.__name__, self.metric_key, self.start_time])
                load_succeed = self._load_model(self.model, model_name)
                if load_succeed:
                    self.logger.info("Reloaded the best model.")
                else:
                    self.logger.info("Fail to reload best model.")

            if self.dev_data is None and self.save_path is not None:
                model_name = "_".join([self.model.__class__.__name__, self.start_time])
                self._save_model(self.model, model_name)

        finally:
            if self.dev_data is not None and self.best_dev_perf is not None:
                self.logger.info(
                    "\nIn Epoch:{}/Step:{}, got best dev performance:".format(self.best_dev_epoch, self.best_dev_step))
                self.logger.info(self.tester._format_eval_results(self.best_dev_perf))
                results['best_eval'] = self.best_dev_perf
                results['best_epoch'] = self.best_dev_epoch
                results['best_step'] = self.best_dev_step

        results['seconds'] = round(time.time() - start_time, 2)

        return results

    def _train(self):
        if not self.use_tqdm:
            from .utils import _pseudo_tqdm as inner_tqdm
        else:
            inner_tqdm = tqdm
        start = time.time()
        with inner_tqdm(total=self.n_steps, postfix='loss:{0:<6.5f}', leave=False, dynamic_ncols=True,
                        initial=self.step) as pbar:
            self.pbar = pbar
            avg_loss = 0
            self.batch_per_epoch = self.data_iterator.num_batches
            for epoch in range(self.epoch, self.n_epochs + 1):
                self.epoch = epoch
                pbar.set_description_str(desc="Epoch {}/{}".format(epoch, self.n_epochs))
                # early stopping
                self.callback_manager.on_epoch_begin()
                for batch_x, batch_y in self.data_iterator:
                    self.step += 1
                    _move_dict_value_to_device(batch_x, batch_y, device=self._model_device)
                    indices = self.data_iterator.get_batch_indices()
                    # negative sampling; replace unknown; re-weight batch_y
                    self.callback_manager.on_batch_begin(batch_x, batch_y, indices)
                    prediction = self._data_forward(self.model, batch_x)

                    # edit prediction
                    self.callback_manager.on_loss_begin(batch_y, prediction)
                    loss = self._compute_loss(prediction, batch_y).mean()
                    loss = loss / self.update_every
                    avg_loss += loss.item()

                    # Is loss NaN or inf? requires_grad = False
                    self.callback_manager.on_backward_begin(loss)
                    self._grad_backward(loss)
                    self.callback_manager.on_backward_end()

                    self._update()
                    self.callback_manager.on_step_end()

                    if self.step % self.print_every == 0:
                        avg_loss = float(avg_loss) / self.print_every
                        if self.use_tqdm:
                            print_output = "loss:{:<6.5f}".format(avg_loss)
                            pbar.update(self.print_every)
                        else:
                            end = time.time()
                            diff = timedelta(seconds=round(end - start))
                            print_output = "[epoch: {:>3} step: {:>4}] train loss: {:>4.6} time: {}".format(
                                epoch, self.step, avg_loss, diff)
                        pbar.set_postfix_str(print_output)
                        avg_loss = 0
                    self.callback_manager.on_batch_end()

                    if (self.validate_every > 0 and self.step % self.validate_every == 0) \
                            and self.dev_data is not None:
                        eval_res = self._do_validation(epoch=epoch, step=self.step)
                        eval_str = "Evaluation on dev at Epoch {}/{}. Step:{}/{}: ".format(epoch, self.n_epochs, self.step,
                                                                                    self.n_steps)
                        # pbar.write(eval_str + '\n')
                        self.logger.info(eval_str)
                        self.logger.info(self.tester._format_eval_results(eval_res)+'\n')
                # ================= mini-batch end ==================== #
                if self.validate_every<0 and self.dev_data is not None:  # 在epoch结束之后的evaluate
                    eval_res = self._do_validation(epoch=epoch, step=self.step)
                    eval_str = "Evaluation on dev at Epoch {}/{}. Step:{}/{}: ".format(epoch, self.n_epochs, self.step,
                                                                                       self.n_steps)
                    # pbar.write(eval_str + '\n')
                    self.logger.info(eval_str)
                    self.logger.info(self.tester._format_eval_results(eval_res) + '\n')
                # lr decay; early stopping
                self.callback_manager.on_epoch_end()
            # =============== epochs end =================== #
            pbar.close()
            self.pbar = None
        # ============ tqdm end ============== #

    def _do_validation(self, epoch, step):
        self.callback_manager.on_valid_begin()
        res = self.tester.test()

        is_better_eval = False
        if self._better_eval_result(res):
            if self.save_path is not None:
                self._save_model(self.model,
                                 "best_" + "_".join([self.model.__class__.__name__, self.metric_key, self.start_time]))
            elif self._load_best_model:
                self._best_model_states = {name: param.cpu().clone() for name, param in self.model.state_dict().items()}
            self.best_dev_perf = res
            self.best_dev_epoch = epoch
            self.best_dev_step = step
            is_better_eval = True
        # get validation results; adjust optimizer
        self.callback_manager.on_valid_end(res, self.metric_key, self.optimizer, is_better_eval)
        return res

    def _mode(self, model, is_test=False):
        r"""Train mode or Test mode. This is for PyTorch currently.

        :param model: a PyTorch model
        :param bool is_test: whether in test mode or not.

        """
        if is_test:
            model.eval()
        else:
            model.train()

    def _update(self):
        r"""Perform weight update on a model.

        """
        if self.step % self.update_every == 0:
            self.optimizer.step()

    def _data_forward(self, network, x):
        x = _build_args(self._forward_func, **x)
        y = network(**x)
        if not isinstance(y, dict):
            raise TypeError(
                f"The return value of {_get_func_signature(self._forward_func)} should be dict, got {type(y)}.")
        return y

    def _grad_backward(self, loss):
        r"""Compute gradient with link rules.

        :param loss: a scalar where back-prop starts

        For PyTorch, just do "loss.backward()"
        """
        if (self.step-1) % self.update_every == 0:
            self.model.zero_grad()
        loss.backward()

    def _compute_loss(self, predict, truth):
        r"""Compute loss given prediction and ground truth.

        :param predict: prediction dict, produced by model.forward
        :param truth: ground truth dict, produced by batch_y
        :return: a scalar
        """
        return self.losser(predict, truth)

    def _save_model(self, model, model_name, only_param=False):
        r""" 存储不含有显卡信息的state_dict或model
        :param model:
        :param model_name:
        :param only_param:
        :return:
        """
        if self.save_path is not None:
            model_path = os.path.join(self.save_path, model_name)
            if not os.path.exists(self.save_path):
                os.makedirs(self.save_path, exist_ok=True)
            if _model_contains_inner_module(model):
                model = model.module
            if only_param:
                state_dict = model.state_dict()
                for key in state_dict:
                    state_dict[key] = state_dict[key].cpu()
                torch.save(state_dict, model_path)
            else:
                model.cpu()
                torch.save(model, model_path)
                model.to(self._model_device)

    def _load_model(self, model, model_name, only_param=False):
        # 返回bool值指示是否成功reload模型
        if self.save_path is not None:
            model_path = os.path.join(self.save_path, model_name)
            if only_param:
                states = torch.load(model_path)
            else:
                states = torch.load(model_path).state_dict()
            if _model_contains_inner_module(model):
                model.module.load_state_dict(states)
            else:
                model.load_state_dict(states)
        elif hasattr(self, "_best_model_states"):
            model.load_state_dict(self._best_model_states)
        else:
            return False
        return True

    def _better_eval_result(self, metrics):
        r"""Check if the current epoch yields better validation results.

        :return bool value: True means current results on dev set is the best.
        """
        indicator, indicator_val = _check_eval_results(metrics, self.metric_key, self.metrics)
        if self.metric_key is None:
            self.metric_key = indicator
        is_better = True
        if self.best_metric_indicator is None:
            # first-time validation
            self.best_metric_indicator = indicator_val
        else:
            if self.increase_better is True:
                if indicator_val > self.best_metric_indicator:
                    self.best_metric_indicator = indicator_val
                else:
                    is_better = False
            else:
                if indicator_val < self.best_metric_indicator:
                    self.best_metric_indicator = indicator_val
                else:
                    is_better = False
        return is_better

    @property
    def is_master(self):
        r"""是否是主进程"""
        return True

DEFAULT_CHECK_BATCH_SIZE = 2
DEFAULT_CHECK_NUM_BATCH = 2


def _get_value_info(_dict):
    # given a dict value, return information about this dict's value. Return list of str
    strs = []
    for key, value in _dict.items():
        _str = ''
        if isinstance(value, torch.Tensor):
            _str += "\t{}: (1)type:torch.Tensor (2)dtype:{}, (3)shape:{} ".format(key,
                                                                                  value.dtype, value.size())
        elif isinstance(value, np.ndarray):
            _str += "\t{}: (1)type:numpy.ndarray (2)dtype:{}, (3)shape:{} ".format(key,
                                                                                   value.dtype, value.shape)
        else:
            _str += "\t{}: type:{}".format(key, type(value))
        strs.append(_str)
    return strs


def _check_code(dataset, model, losser, metrics, forward_func, batch_size=DEFAULT_CHECK_BATCH_SIZE,
                dev_data=None, metric_key=None, check_level=0):
    # check get_loss 方法
    model_device = _get_model_device(model=model)
    _iter = DataSetIter(dataset, batch_size=batch_size, sampler=None)

    for batch_count, (batch_x, batch_y) in enumerate(_iter):
        _move_dict_value_to_device(batch_x, batch_y, device=model_device)
        # forward check
        if batch_count == 0:
            info_str = ""
            input_fields = _get_value_info(batch_x)
            target_fields = _get_value_info(batch_y)
            if len(input_fields) > 0:
                info_str += "input fields after batch(if batch size is {}):\n".format(batch_size)
                info_str += "\n".join(input_fields)
                info_str += '\n'
            else:
                raise RuntimeError("There is no input field.")
            if len(target_fields) > 0:
                info_str += "target fields after batch(if batch size is {}):\n".format(batch_size)
                info_str += "\n".join(target_fields)
                info_str += '\n'
            else:
                info_str += 'There is no target field.'
            logger.info(info_str)
            _check_forward_error(forward_func=forward_func, dataset=dataset,
                                 batch_x=batch_x, check_level=check_level)
        refined_batch_x = _build_args(forward_func, **batch_x)
        pred_dict = model(**refined_batch_x)
        func_signature = _get_func_signature(forward_func)
        if not isinstance(pred_dict, dict):
            raise TypeError(f"The return value of {func_signature} should be `dict`, not `{type(pred_dict)}`.")
        
        # loss check
        try:
            loss = losser(pred_dict, batch_y)
            # check loss output
            if batch_count == 0:
                if not isinstance(loss, torch.Tensor):
                    raise TypeError(
                        f"The return value of {_get_func_signature(losser.get_loss)} should be `torch.Tensor`, "
                        f"but got `{type(loss)}`.")
                if len(loss.size()) != 0:
                    raise ValueError(
                        f"The size of return value of {_get_func_signature(losser.get_loss)} is {loss.size()}, "
                        f"should be torch.size([])")
            loss.backward()
        except _CheckError as e:
            # TODO: another error raised if _CheckError caught
            pre_func_signature = _get_func_signature(forward_func)
            _check_loss_evaluate(prev_func_signature=pre_func_signature, func_signature=e.func_signature,
                                 check_res=e.check_res, pred_dict=pred_dict, target_dict=batch_y,
                                 dataset=dataset, check_level=check_level)
        model.zero_grad()
        if batch_count + 1 >= DEFAULT_CHECK_NUM_BATCH:
            break
    
    if dev_data is not None:
        tester = Tester(data=dev_data[:batch_size * DEFAULT_CHECK_NUM_BATCH], model=model, metrics=metrics,
                        batch_size=batch_size, verbose=-1, use_tqdm=False)
        evaluate_results = tester.test()
        _check_eval_results(metrics=evaluate_results, metric_key=metric_key, metric_list=metrics)


def _check_eval_results(metrics, metric_key, metric_list):
    # metrics: tester返回的结果
    # metric_key: 一个用来做筛选的指标，来自Trainer的初始化
    # metric_list: 多个用来做评价的指标，来自Trainer的初始化
    if isinstance(metrics, tuple):
        loss, metrics = metrics
    
    if isinstance(metrics, dict):
        metric_dict = list(metrics.values())[0]  # 取第一个metric
        
        if metric_key is None:
            indicator_val, indicator = list(metric_dict.values())[0], list(metric_dict.keys())[0]
        else:
            # metric_key is set
            if metric_key not in metric_dict:
                raise RuntimeError(f"metric key {metric_key} not found in {metric_dict}")
            indicator_val = metric_dict[metric_key]
            indicator = metric_key
    else:
        raise RuntimeError("Invalid metrics type. Expect {}, got {}".format((tuple, dict), type(metrics)))
    return indicator, indicator_val
