# Supplementary material
Source: ML conference proceedings conference paper supplement (https://proceedings.neurips.cc/paper_files/paper/2022/hash/0f5fcf4bff73a3537e0813a38f0d3f76-Abstract.html)
Supplement: Supplementary file 1 [file 0f5fcf4bff73a3537e0813a38f0d3f76-Supplemental-Conference.zip › supplemental/transformers/fastNLP/core/vocabulary.py]

r"""
.. todo::
    doc
"""

__all__ = [
    "Vocabulary",
    "VocabularyOption",
]

from collections import Counter
from functools import partial
from functools import wraps

from ._logger import logger
from .dataset import DataSet
from .utils import Option
from .utils import _is_iterable
import io


class VocabularyOption(Option):
    def __init__(self,
                 max_size=None,
                 min_freq=None,
                 padding='<pad>',
                 unknown='<unk>'):
        super().__init__(
            max_size=max_size,
            min_freq=min_freq,
            padding=padding,
            unknown=unknown
        )


def _check_build_vocab(func):
    r"""A decorator to make sure the indexing is built before used.

    """
    
    @wraps(func)  # to solve missing docstring
    def _wrapper(self, *args, **kwargs):
        if self._word2idx is None or self.rebuild is True:
            self.build_vocab()
        return func(self, *args, **kwargs)
    
    return _wrapper


def _check_build_status(func):
    r"""A decorator to check whether the vocabulary updates after the last build.

    """
    
    @wraps(func)  # to solve missing docstring
    def _wrapper(self, *args, **kwargs):
        if self.rebuild is False:
            self.rebuild = True
            if self.max_size is not None and len(self.word_count) >= self.max_size:
                logger.info("[Warning] Vocabulary has reached the max size {} when calling {} method. "
                            "Adding more words may cause unexpected behaviour of Vocabulary. ".format(
                    self.max_size, func.__name__))
        return func(self, *args, **kwargs)
    
    return _wrapper


class Vocabulary(object):
    r"""
    用于构建, 存储和使用 `str` 到 `int` 的一一映射::

        vocab = Vocabulary()
        word_list = "this is a word list".split()
        vocab.update(word_list)
        vocab["word"] # str to int
        vocab.to_word(5) # int to str
    """
    
    def __init__(self, max_size=None, min_freq=None, padding='<pad>', unknown='<unk>'):
        r"""
        
        :param int max_size: `Vocabulary` 的最大大小, 即能存储词的最大数量
            若为 ``None`` , 则不限制大小. Default: ``None``
        :param int min_freq: 能被记录下的词在文本中的最小出现频率, 应大于或等于 1.
            若小于该频率, 词语将被视为 `unknown`. 若为 ``None`` , 所有文本中的词都被记录. Default: ``None``
        :param str optional padding: padding的字符. 如果设置为 ``None`` ,
            则vocabulary中不考虑padding, 也不计入词表大小，为 ``None`` 的情况多在为label建立Vocabulary的情况.
            Default: '<pad>'
        :param str optional unknown: unknown的字符，所有未被记录的词在转为 `int` 时将被视为unknown.
            如果设置为 ``None`` ,则vocabulary中不考虑unknow, 也不计入词表大小.
            为 ``None`` 的情况多在为label建立Vocabulary的情况.
            Default: '<unk>'
        """
        self.max_size = max_size
        self.min_freq = min_freq
        self.word_count = Counter()
        self.unknown = unknown
        self.padding = padding
        self._word2idx = None
        self._idx2word = None
        self.rebuild = True
        #  用于承载不需要单独创建entry的词语，具体见from_dataset()方法
        self._no_create_word = Counter()

    @property
    @_check_build_vocab
    def word2idx(self):
        return self._word2idx

    @word2idx.setter
    def word2idx(self, value):
        self._word2idx = value

    @property
    @_check_build_vocab
    def idx2word(self):
        return self._idx2word

    @idx2word.setter
    def idx2word(self, value):
        self._word2idx = value

    @_check_build_status
    def update(self, word_lst, no_create_entry=False):
        r"""依次增加序列中词在词典中的出现频率

        :param list word_lst: a list of strings
        :param bool no_create_entry: 在使用fastNLP.TokenEmbedding加载预训练模型时，没有从预训练词表中找到这个词的处理方式。
            如果为True，则不会有这个词语创建一个单独的entry，它将一直被指向unk的表示; 如果为False，则为这个词创建一个单独
            的entry。如果这个word来自于dev或者test，一般设置为True，如果来自与train一般设置为False。以下两种情况: 如果新
            加入一个word，且no_create_entry为True，但这个词之前已经在Vocabulary中且并不是no_create_entry的，则还是会为这
            个词创建一个单独的vector; 如果no_create_entry为False，但这个词之前已经在Vocabulary中且并不是no_create_entry的，
            则这个词将认为是需要创建单独的vector的。
        """
        self._add_no_create_entry(word_lst, no_create_entry)
        self.word_count.update(word_lst)
        return self
    
    @_check_build_status
    def add(self, word, no_create_entry=False):
        r"""
        增加一个新词在词典中的出现频率

        :param str word: 新词
        :param bool no_create_entry: 在使用fastNLP.TokenEmbedding加载预训练模型时，没有从预训练词表中找到这个词的处理方式。
            如果为True，则不会有这个词语创建一个单独的entry，它将一直被指向unk的表示; 如果为False，则为这个词创建一个单独
            的entry。如果这个word来自于dev或者test，一般设置为True，如果来自与train一般设置为False。以下两种情况: 如果新
            加入一个word，且no_create_entry为True，但这个词之前已经在Vocabulary中且并不是no_create_entry的，则还是会为这
            个词创建一个单独的vector; 如果no_create_entry为False，但这个词之前已经在Vocabulary中且并不是no_create_entry的，
            则这个词将认为是需要创建单独的vector的。
        """
        self._add_no_create_entry(word, no_create_entry)
        self.word_count[word] += 1
        return self
    
    def _add_no_create_entry(self, word, no_create_entry):
        r"""
        在新加入word时，检查_no_create_word的设置。

        :param str List[str] word:
        :param bool no_create_entry:
        :return:
        """
        if isinstance(word, str) or not _is_iterable(word):
            word = [word]
        for w in word:
            if no_create_entry and self.word_count.get(w, 0) == self._no_create_word.get(w, 0):
                self._no_create_word[w] += 1
            elif not no_create_entry and w in self._no_create_word:
                self._no_create_word.pop(w)
    
    @_check_build_status
    def add_word(self, word, no_create_entry=False):
        r"""
        增加一个新词在词典中的出现频率

        :param str word: 新词
        :param bool no_create_entry: 在使用fastNLP.TokenEmbedding加载预训练模型时，没有从预训练词表中找到这个词的处理方式。
            如果为True，则不会有这个词语创建一个单独的entry，它将一直被指向unk的表示; 如果为False，则为这个词创建一个单独
            的entry。如果这个word来自于dev或者test，一般设置为True，如果来自与train一般设置为False。以下两种情况: 如果新
            加入一个word，且no_create_entry为True，但这个词之前已经在Vocabulary中且并不是no_create_entry的，则还是会为这
            个词创建一个单独的vector; 如果no_create_entry为False，但这个词之前已经在Vocabulary中且并不是no_create_entry的，
            则这个词将认为是需要创建单独的vector的。
        """
        self.add(word, no_create_entry=no_create_entry)
    
    @_check_build_status
    def add_word_lst(self, word_lst, no_create_entry=False):
        r"""
        依次增加序列中词在词典中的出现频率

        :param list[str] word_lst: 词的序列
        :param bool no_create_entry: 在使用fastNLP.TokenEmbedding加载预训练模型时，没有从预训练词表中找到这个词的处理方式。
            如果为True，则不会有这个词语创建一个单独的entry，它将一直被指向unk的表示; 如果为False，则为这个词创建一个单独
            的entry。如果这个word来自于dev或者test，一般设置为True，如果来自与train一般设置为False。以下两种情况: 如果新
            加入一个word，且no_create_entry为True，但这个词之前已经在Vocabulary中且并不是no_create_entry的，则还是会为这
            个词创建一个单独的vector; 如果no_create_entry为False，但这个词之前已经在Vocabulary中且并不是no_create_entry的，
            则这个词将认为是需要创建单独的vector的。
        """
        self.update(word_lst, no_create_entry=no_create_entry)
        return self
    
    def build_vocab(self):
        r"""
        根据已经出现的词和出现频率构建词典. 注意: 重复构建可能会改变词典的大小,
        但已经记录在词典中的词, 不会改变对应的 `int`

        """
        if self._word2idx is None:
            self._word2idx = {}
            if self.padding is not None:
                self._word2idx[self.padding] = len(self._word2idx)
            if (self.unknown is not None) and (self.unknown != self.padding):
                self._word2idx[self.unknown] = len(self._word2idx)
        
        max_size = min(self.max_size, len(self.word_count)) if self.max_size else None
        words = self.word_count.most_common(max_size)
        if self.min_freq is not None:
            words = filter(lambda kv: kv[1] >= self.min_freq, words)
        if self._word2idx is not None:
            words = filter(lambda kv: kv[0] not in self._word2idx, words)
        start_idx = len(self._word2idx)
        self._word2idx.update({w: i + start_idx for i, (w, _) in enumerate(words)})
        self.build_reverse_vocab()
        self.rebuild = False
        return self
    
    def build_reverse_vocab(self):
        r"""
        基于 `word to index` dict, 构建 `index to word` dict.

        """
        self._idx2word = {i: w for w, i in self._word2idx.items()}
        return self
    
    @_check_build_vocab
    def __len__(self):
        return len(self._word2idx)
    
    @_check_build_vocab
    def __contains__(self, item):
        r"""
        检查词是否被记录

        :param item: the word
        :return: True or False
        """
        return item in self._word2idx
    
    def has_word(self, w):
        r"""
        检查词是否被记录::

            has_abc = vocab.has_word('abc')
            # equals to
            has_abc = 'abc' in vocab

        :param item: the word
        :return: ``True`` or ``False``
        """
        return self.__contains__(w)
    
    @_check_build_vocab
    def __getitem__(self, w):
        r"""
        To support usage like::

            vocab[w]
        """
        if w in self._word2idx:
            return self._word2idx[w]
        if self.unknown is not None:
            return self._word2idx[self.unknown]
        else:
            raise ValueError("word `{}` not in vocabulary".format(w))
    
    @_check_build_vocab
    def index_dataset(self, *datasets, field_name, new_field_name=None):
        r"""
        将DataSet中对应field的词转为数字，Example::

            # remember to use `field_name`
            vocab.index_dataset(train_data, dev_data, test_data, field_name='words')

        :param ~fastNLP.DataSet,List[~fastNLP.DataSet] datasets: 需要转index的一个或多个数据集
        :param list,str field_name: 需要转index的field, 若有多个 DataSet, 每个DataSet都必须有此 field.
            目前支持 ``str`` , ``List[str]``
        :param list,str new_field_name: 保存结果的field_name. 若为 ``None`` , 将覆盖原field.
            Default: ``None``.
        """
        
        def index_instance(field):
            r"""
            有几种情况, str, 1d-list, 2d-list
            :param ins:
            :return:
            """
            if isinstance(field, str) or not _is_iterable(field):
                return self.to_index(field)
            else:
                if isinstance(field[0], str) or not _is_iterable(field[0]):
                    return [self.to_index(w) for w in field]
                else:
                    if not isinstance(field[0][0], str) and _is_iterable(field[0][0]):
                        raise RuntimeError("Only support field with 2 dimensions.")
                    return [[self.to_index(c) for c in w] for w in field]
        
        new_field_name = new_field_name or field_name
        
        if type(new_field_name) == type(field_name):
            if isinstance(new_field_name, list):
                assert len(new_field_name) == len(field_name), "new_field_name should have same number elements with " \
                                                               "field_name."
            elif isinstance(new_field_name, str):
                field_name = [field_name]
                new_field_name = [new_field_name]
            else:
                raise TypeError("field_name and new_field_name can only be str or List[str].")
        
        for idx, dataset in enumerate(datasets):
            if isinstance(dataset, DataSet):
                try:
                    for f_n, n_f_n in zip(field_name, new_field_name):
                        dataset.apply_field(index_instance, field_name=f_n, new_field_name=n_f_n)
                except Exception as e:
                    logger.info("When processing the `{}` dataset, the following error occurred.".format(idx))
                    raise e
            else:
                raise RuntimeError("Only DataSet type is allowed.")
        return self
    
    @property
    def _no_create_word_length(self):
        return len(self._no_create_word)
    
    def from_dataset(self, *datasets, field_name, no_create_entry_dataset=None):
        r"""
        使用dataset的对应field中词构建词典::

            # remember to use `field_name`
            vocab.from_dataset(train_data1, train_data2, field_name='words')

        :param ~fastNLP.DataSet,List[~fastNLP.DataSet] datasets: 需要转index的一个或多个数据集
        :param str,List[str] field_name: 可为 ``str`` 或 ``List[str]`` .
            构建词典所使用的 field(s), 支持一个或多个field，若有多个 DataSet, 每个DataSet都必须有这些field. 目前支持的field结构
            : ``str`` , ``List[str]``
        :param no_create_entry_dataset: 可以传入DataSet, List[DataSet]或者None(默认)，该选项用在接下来的模型会使用pretrain
            的embedding(包括glove, word2vec, elmo与bert)且会finetune的情况。如果仅使用来自于train的数据建立vocabulary，会导致test与dev
            中的数据无法充分利用到来自于预训练embedding的信息，所以在建立词表的时候将test与dev考虑进来会使得最终的结果更好。
            如果一个词出现在了train中，但是没在预训练模型中，embedding会为它用unk初始化，但它是单独的一个vector，如果
            finetune embedding的话，这个词在更新之后可能会有更好的表示; 而如果这个词仅出现在了dev或test中，那么就不能为它们单独建立vector，
            而应该让它指向unk这个vector的值。所以只位于no_create_entry_dataset中的token，将首先从预训练的词表中寻找它的表示，
            如果找到了，就使用该表示; 如果没有找到，则认为该词的表示应该为unk的表示。
        :return self:
        """
        if isinstance(field_name, str):
            field_name = [field_name]
        elif not isinstance(field_name, list):
            raise TypeError('invalid argument field_name: {}'.format(field_name))
        
        def construct_vocab(ins, no_create_entry=False):
            for fn in field_name:
                field = ins[fn]
                if isinstance(field, str) or not _is_iterable(field):
                    self.add_word(field, no_create_entry=no_create_entry)
                else:
                    if isinstance(field[0], str) or not _is_iterable(field[0]):
                        for word in field:
                            self.add_word(word, no_create_entry=no_create_entry)
                    else:
                        if not isinstance(field[0][0], str) and _is_iterable(field[0][0]):
                            raise RuntimeError("Only support field with 2 dimensions.")
                        for words in field:
                            for word in words:
                                self.add_word(word, no_create_entry=no_create_entry)
        
        for idx, dataset in enumerate(datasets):
            if isinstance(dataset, DataSet):
                try:
                    dataset.apply(construct_vocab)
                except BaseException as e:
                    logger.error("When processing the `{}` dataset, the following error occurred:".format(idx))
                    raise e
            else:
                raise TypeError("Only DataSet type is allowed.")
        
        if no_create_entry_dataset is not None:
            partial_construct_vocab = partial(construct_vocab, no_create_entry=True)
            if isinstance(no_create_entry_dataset, DataSet):
                no_create_entry_dataset.apply(partial_construct_vocab)
            elif isinstance(no_create_entry_dataset, list):
                for dataset in no_create_entry_dataset:
                    if not isinstance(dataset, DataSet):
                        raise TypeError("Only DataSet type is allowed.")
                    dataset.apply(partial_construct_vocab)
        return self
    
    def _is_word_no_create_entry(self, word):
        r"""
        判断当前的word是否是不需要创建entry的，具体参见from_dataset的说明
        :param word: str
        :return: bool
        """
        return word in self._no_create_word
    
    def to_index(self, w):
        r"""
        将词转为数字. 若词不再词典中被记录, 将视为 unknown, 若 ``unknown=None`` , 将抛出 ``ValueError`` ::

            index = vocab.to_index('abc')
            # equals to
            index = vocab['abc']

        :param str w: a word
        :return int index: the number
        """
        return self.__getitem__(w)
    
    @property
    @_check_build_vocab
    def unknown_idx(self):
        r"""
        unknown 对应的数字.
        """
        if self.unknown is None:
            return None
        return self._word2idx[self.unknown]
    
    @property
    @_check_build_vocab
    def padding_idx(self):
        r"""
        padding 对应的数字
        """
        if self.padding is None:
            return None
        return self._word2idx[self.padding]
    
    @_check_build_vocab
    def to_word(self, idx):
        r"""
        给定一个数字, 将其转为对应的词.

        :param int idx: the index
        :return str word: the word
        """
        return self._idx2word[idx]
    
    def clear(self):
        r"""
        删除Vocabulary中的词表数据。相当于重新初始化一下。

        :return:
        """
        self.word_count.clear()
        self._word2idx = None
        self._idx2word = None
        self.rebuild = True
        self._no_create_word.clear()
        return self
    
    def __getstate__(self):
        r"""Use to prepare data for pickle.

        """
        len(self)  # make sure vocab has been built
        state = self.__dict__.copy()
        # no need to pickle _idx2word as it can be constructed from _word2idx
        del state['_idx2word']
        return state
    
    def __setstate__(self, state):
        r"""Use to restore state from pickle.

        """
        self.__dict__.update(state)
        self.build_reverse_vocab()
    
    def __repr__(self):
        return "Vocabulary({}...)".format(list(self.word_count.keys())[:5])
    
    @_check_build_vocab
    def __iter__(self):
        # 依次(word1, 0), (word1, 1)
        for index in range(len(self._word2idx)):
            yield self.to_word(index), index

    def save(self, filepath):
        r"""

        :param str,io.StringIO filepath: Vocabulary的储存路径
        :return:
        """
        if isinstance(filepath, io.IOBase):
            assert filepath.writable()
            f = filepath
        elif isinstance(filepath, str):
            try:
                f = open(filepath, 'w', encoding='utf-8')
            except Exception as e:
                raise e
        else:
            raise TypeError("Illegal `filepath`.")

        f.write(f'max_size\t{self.max_size}\n')
        f.write(f'min_freq\t{self.min_freq}\n')
        f.write(f'unknown\t{self.unknown}\n')
        f.write(f'padding\t{self.padding}\n')
        f.write(f'rebuild\t{self.rebuild}\n')
        f.write('\n')
        # idx: 如果idx为-2, 说明还没有进行build; 如果idx为-1，说明该词未编入
        # no_create_entry: 如果为1，说明该词是no_create_entry; 0 otherwise
        # word \t count \t idx \t no_create_entry \n
        idx = -2
        for word, count in self.word_count.items():
            if self._word2idx is not None:
                idx = self._word2idx.get(word, -1)
            is_no_create_entry = int(self._is_word_no_create_entry(word))
            f.write(f'{word}\t{count}\t{idx}\t{is_no_create_entry}\n')
        if isinstance(filepath, str):  # 如果是file的话就关闭
            f.close()

    @staticmethod
    def load(filepath):
        r"""

        :param str,io.StringIO filepath: Vocabulary的读取路径
        :return: Vocabulary
        """
        if isinstance(filepath, io.IOBase):
            assert filepath.writable()
            f = filepath
        elif isinstance(filepath, str):
            try:
                f = open(filepath, 'r', encoding='utf-8')
            except Exception as e:
                raise e
        else:
            raise TypeError("Illegal `filepath`.")

        vocab = Vocabulary()
        for line in f:
            line = line.strip('\n')
            if line:
                name, value = line.split()
                if name in ('max_size', 'min_freq'):
                    value = int(value) if value!='None' else None
                    setattr(vocab, name, value)
                elif name in ('unknown', 'padding'):
                    value = value if value!='None' else None
                    setattr(vocab, name, value)
                elif name == 'rebuild':
                    vocab.rebuild = True if value=='True' else False
            else:
                break
        word_counter = {}
        no_create_entry_counter = {}
        word2idx = {}
        for line in f:
            line = line.strip('\n')
            if line:
                parts = line.split('\t')
                word,count,idx,no_create_entry = parts[0], int(parts[1]), int(parts[2]), int(parts[3])
                if idx >= 0:
                    word2idx[word] = idx
                word_counter[word] = count
                if no_create_entry:
                    no_create_entry_counter[word] = count

        word_counter = Counter(word_counter)
        no_create_entry_counter = Counter(no_create_entry_counter)
        if len(word2idx)>0:
            if vocab.padding:
                word2idx[vocab.padding] = 0
            if vocab.unknown:
                word2idx[vocab.unknown] = 1 if vocab.padding else 0
            idx2word = {value:key for key,value in word2idx.items()}

        vocab.word_count = word_counter
        vocab._no_create_word = no_create_entry_counter
        if word2idx:
            vocab._word2idx = word2idx
            vocab._idx2word = idx2word
        if isinstance(filepath, str):  # 如果是file的话就关闭
            f.close()
        return vocab
