# Supplementary material
Source: ML conference proceedings conference paper supplement (https://proceedings.neurips.cc/paper_files/paper/2022/hash/0f5fcf4bff73a3537e0813a38f0d3f76-Abstract.html)
Supplement: Supplementary file 1 [file 0f5fcf4bff73a3537e0813a38f0d3f76-Supplemental-Conference.zip › supplemental/transformers/fastNLP/embeddings/utils.py]

r"""
.. todo::
    doc
"""
import numpy as np
import torch
from torch import nn as nn

from ..core.vocabulary import Vocabulary

__all__ = [
    'get_embeddings',
    'get_sinusoid_encoding_table'
]


def _construct_char_vocab_from_vocab(vocab: Vocabulary, min_freq: int = 1, include_word_start_end=True):
    r"""
    给定一个word的vocabulary生成character的vocabulary.

    :param vocab: 从vocab
    :param min_freq:
    :param include_word_start_end: 是否需要包含特殊的<bow>和<eos>
    :return:
    """
    char_vocab = Vocabulary(min_freq=min_freq)
    for word, index in vocab:
        if not vocab._is_word_no_create_entry(word):
            char_vocab.add_word_lst(list(word))
    if include_word_start_end:
        char_vocab.add_word_lst(['<bow>', '<eow>'])
    return char_vocab


def get_embeddings(init_embed, padding_idx=None):
    r"""
    根据输入的init_embed返回Embedding对象。如果输入是tuple, 则随机初始化一个nn.Embedding; 如果输入是numpy.ndarray, 则按照ndarray
    的值将nn.Embedding初始化; 如果输入是torch.Tensor, 则按该值初始化nn.Embedding; 如果输入是fastNLP中的embedding将不做处理
    返回原对象。

    :param init_embed: 可以是 tuple:(num_embedings, embedding_dim), 即embedding的大小和每个词的维度;也可以传入
        nn.Embedding 对象, 此时就以传入的对象作为embedding; 传入np.ndarray也行，将使用传入的ndarray作为作为Embedding初始化;
        传入torch.Tensor, 将使用传入的值作为Embedding初始化。
    :param padding_idx: 当传入tuple时，padding_idx有效
    :return nn.Embedding:  embeddings
    """
    if isinstance(init_embed, tuple):
        res = nn.Embedding(
            num_embeddings=init_embed[0], embedding_dim=init_embed[1], padding_idx=padding_idx)
        nn.init.uniform_(res.weight.data, a=-np.sqrt(3 / res.weight.data.size(1)),
                         b=np.sqrt(3 / res.weight.data.size(1)))
    elif isinstance(init_embed, nn.Module):
        res = init_embed
    elif isinstance(init_embed, torch.Tensor):
        res = nn.Embedding.from_pretrained(init_embed, freeze=False)
    elif isinstance(init_embed, np.ndarray):
        init_embed = torch.tensor(init_embed, dtype=torch.float32)
        res = nn.Embedding.from_pretrained(init_embed, freeze=False)
    else:
        raise TypeError(
            'invalid init_embed type: {}'.format((type(init_embed))))
    return res


def get_sinusoid_encoding_table(n_position, d_hid, padding_idx=None):
    """
    sinusoid的embedding，其中position的表示中，偶数维(0,2,4,...)是sin, 奇数(1,3,5...)是cos

    :param int n_position: 一共多少个position
    :param int d_hid: 多少维度，需要为偶数
    :param padding_idx:
    :return: torch.FloatTensor, shape为n_position x d_hid
    """

    def cal_angle(position, hid_idx):
        return position / np.power(10000, 2 * (hid_idx // 2) / d_hid)

    def get_posi_angle_vec(position):
        return [cal_angle(position, hid_j) for hid_j in range(d_hid)]

    sinusoid_table = np.array([get_posi_angle_vec(pos_i) for pos_i in range(n_position)])

    sinusoid_table[:, 0::2] = np.sin(sinusoid_table[:, 0::2])  # dim 2i
    sinusoid_table[:, 1::2] = np.cos(sinusoid_table[:, 1::2])  # dim 2i+1

    if padding_idx is not None:
        # zero vector for padding dimension
        sinusoid_table[padding_idx] = 0.

    return torch.FloatTensor(sinusoid_table)
