# Supplementary material
Source: ML conference proceedings conference paper supplement (https://proceedings.neurips.cc/paper_files/paper/2022/hash/0f5fcf4bff73a3537e0813a38f0d3f76-Abstract.html)
Supplement: Supplementary file 1 [file 0f5fcf4bff73a3537e0813a38f0d3f76-Supplemental-Conference.zip › supplemental/transformers/fastNLP/io/data_bundle.py]

r"""
.. todo::
    doc
"""
__all__ = [
    'DataBundle',
]

from typing import Union, List

from ..core.dataset import DataSet
from ..core.vocabulary import Vocabulary
from ..core._logger import logger


class DataBundle:
    r"""
    经过处理的数据信息，包括一系列数据集（比如：分开的训练集、验证集和测试集）以及各个field对应的vocabulary。该对象一般由fastNLP中各种
    Loader的load函数生成，可以通过以下的方法获取里面的内容

    Example::
        
        data_bundle = YelpLoader().load({'train':'/path/to/train', 'dev': '/path/to/dev'})
        train_vocabs = data_bundle.vocabs['train']
        train_data = data_bundle.datasets['train']
        dev_data = data_bundle.datasets['train']

    """

    def __init__(self, vocabs: dict = None, datasets: dict = None):
        r"""
        
        :param vocabs: 从名称(字符串)到 :class:`~fastNLP.Vocabulary` 类型的dict
        :param datasets: 从名称(字符串)到 :class:`~fastNLP.DataSet` 类型的dict
        """
        self.vocabs = vocabs or {}
        self.datasets = datasets or {}

    def set_vocab(self, vocab, field_name):
        r"""
        向DataBunlde中增加vocab

        :param ~fastNLP.Vocabulary vocab: 词表
        :param str field_name: 这个vocab对应的field名称
        :return: self
        """
        assert isinstance(vocab, Vocabulary), "Only fastNLP.Vocabulary supports."
        self.vocabs[field_name] = vocab
        return self

    def set_dataset(self, dataset, name: str):
        r"""

        :param ~fastNLP.DataSet dataset: 传递给DataBundle的DataSet
        :param str name: dataset的名称
        :return: self
        """
        assert isinstance(dataset, DataSet), "Only fastNLP.DataSet supports."
        self.datasets[name] = dataset
        return self

    def get_dataset(self, name: str) -> DataSet:
        r"""
        获取名为name的dataset

        :param str name: dataset的名称，一般为'train', 'dev', 'test'
        :return: DataSet
        """
        if name in self.datasets.keys():
            return self.datasets[name]
        else:
            error_msg = f'DataBundle do NOT have DataSet named {name}. ' \
                        f'It should be one of {self.datasets.keys()}.'
            logger.error(error_msg)
            raise KeyError(error_msg)

    def delete_dataset(self, name: str):
        r"""
        删除名为name的DataSet

        :param str name:
        :return: self
        """
        self.datasets.pop(name, None)
        return self

    def get_vocab(self, field_name: str) -> Vocabulary:
        r"""
        获取field名为field_name对应的vocab

        :param str field_name: 名称
        :return: Vocabulary
        """
        if field_name in self.vocabs.keys():
            return self.vocabs[field_name]
        else:
            error_msg = f'DataBundle do NOT have Vocabulary named {field_name}. ' \
                        f'It should be one of {self.vocabs.keys()}.'
            logger.error(error_msg)
            raise KeyError(error_msg)

    def delete_vocab(self, field_name: str):
        r"""
        删除vocab
        :param str field_name:
        :return: self
        """
        self.vocabs.pop(field_name, None)
        return self

    @property
    def num_dataset(self):
        return len(self.datasets)

    @property
    def num_vocab(self):
        return len(self.vocabs)

    def set_input(self, *field_names, flag=True, use_1st_ins_infer_dim_type=True, ignore_miss_dataset=True):
        r"""
        将field_names中的field设置为input, 对data_bundle中所有的dataset执行该操作::

            data_bundle.set_input('words', 'seq_len')   # 将words和seq_len这两个field的input属性设置为True
            data_bundle.set_input('words', flag=False)  # 将words这个field的input属性设置为False

        :param str field_names: field的名称
        :param bool flag: 将field_name的input状态设置为flag
        :param bool use_1st_ins_infer_dim_type: 如果为True，将不会check该列是否所有数据都是同样的维度，同样的类型。将直接使用第一
            行的数据进行类型和维度推断本列的数据的类型和维度。
        :param bool ignore_miss_dataset: 当某个field名称在某个dataset不存在时，如果为True，则直接忽略该DataSet;
            如果为False，则报错
        :return: self
        """
        for field_name in field_names:
            for name, dataset in self.datasets.items():
                if not ignore_miss_dataset and not dataset.has_field(field_name):
                    raise KeyError(f"Field:{field_name} was not found in DataSet:{name}")
                if not dataset.has_field(field_name):
                    continue
                else:
                    dataset.set_input(field_name, flag=flag, use_1st_ins_infer_dim_type=use_1st_ins_infer_dim_type)
        return self

    def set_target(self, *field_names, flag=True, use_1st_ins_infer_dim_type=True, ignore_miss_dataset=True):
        r"""
        将field_names中的field设置为target, 对data_bundle中所有的dataset执行该操作::

            data_bundle.set_target('target', 'seq_len')   # 将words和target这两个field的input属性设置为True
            data_bundle.set_target('target', flag=False)  # 将target这个field的input属性设置为False

        :param str field_names: field的名称
        :param bool flag: 将field_name的target状态设置为flag
        :param bool use_1st_ins_infer_dim_type: 如果为True，将不会check该列是否所有数据都是同样的维度，同样的类型。将直接使用第一
            行的数据进行类型和维度推断本列的数据的类型和维度。
        :param bool ignore_miss_dataset: 当某个field名称在某个dataset不存在时，如果为True，则直接忽略该DataSet;
            如果为False，则报错
        :return: self
        """
        for field_name in field_names:
            for name, dataset in self.datasets.items():
                if not ignore_miss_dataset and not dataset.has_field(field_name):
                    raise KeyError(f"Field:{field_name} was not found in DataSet:{name}")
                if not dataset.has_field(field_name):
                    continue
                else:
                    dataset.set_target(field_name, flag=flag, use_1st_ins_infer_dim_type=use_1st_ins_infer_dim_type)
        return self

    def set_pad_val(self, field_name, pad_val, ignore_miss_dataset=True):
        r"""
        将DataBundle中所有的DataSet中名为field_name的Field的padding值设置为pad_val.

        :param str field_name:
        :param int pad_val:
        :param bool ignore_miss_dataset: 当某个field名称在某个dataset不存在时，如果为True，则直接忽略该DataSet;
            如果为False，则报错
        :return: self
        """
        for name, dataset in self.datasets.items():
            if dataset.has_field(field_name=field_name):
                dataset.set_pad_val(field_name=field_name, pad_val=pad_val)
            elif not ignore_miss_dataset:
                raise KeyError(f"{field_name} not found DataSet:{name}.")
        return self

    def set_ignore_type(self, *field_names, flag=True, ignore_miss_dataset=True):
        r"""
        将DataBundle中所有的DataSet中名为*field_names的Field的ignore_type设置为flag状态

        :param str field_names:
        :param bool flag:
        :param bool ignore_miss_dataset: 当某个field名称在某个dataset不存在时，如果为True，则直接忽略该DataSet;
            如果为False，则报错
        :return: self
        """
        for name, dataset in self.datasets.items():
            for field_name in field_names:
                if dataset.has_field(field_name=field_name):
                    dataset.set_ignore_type(field_name, flag=flag)
                elif not ignore_miss_dataset:
                    raise KeyError(f"{field_name} not found DataSet:{name}.")
        return self

    def copy_field(self, field_name, new_field_name, ignore_miss_dataset=True):
        r"""
        将DataBundle中所有的DataSet中名为field_name的Field复制一份并命名为叫new_field_name.

        :param str field_name:
        :param str new_field_name:
        :param bool ignore_miss_dataset: 当某个field名称在某个dataset不存在时，如果为True，则直接忽略该DataSet;
            如果为False，则报错
        :return: self
        """
        for name, dataset in self.datasets.items():
            if dataset.has_field(field_name=field_name):
                dataset.copy_field(field_name=field_name, new_field_name=new_field_name)
            elif not ignore_miss_dataset:
                raise KeyError(f"{field_name} not found DataSet:{name}.")
        return self

    def rename_field(self, field_name, new_field_name, ignore_miss_dataset=True, rename_vocab=True):
        r"""
        将DataBundle中所有DataSet中名为field_name的field重命名为new_field_name.

        :param str field_name:
        :param str new_field_name:
        :param bool ignore_miss_dataset: 当某个field名称在某个dataset不存在时，如果为True，则直接忽略该DataSet;
            如果为False，则报错
        :param bool rename_vocab: 如果该field同时也存在于vocabs中，会将该field的名称对应修改
        :return: self
        """
        for name, dataset in self.datasets.items():
            if dataset.has_field(field_name=field_name):
                dataset.rename_field(field_name=field_name, new_field_name=new_field_name)
            elif not ignore_miss_dataset:
                raise KeyError(f"{field_name} not found DataSet:{name}.")
        if rename_vocab:
            if field_name in self.vocabs:
                self.vocabs[new_field_name] = self.vocabs.pop(field_name)

        return self

    def delete_field(self, field_name, ignore_miss_dataset=True, delete_vocab=True):
        r"""
        将DataBundle中所有DataSet中名为field_name的field删除掉.

        :param str field_name:
        :param bool ignore_miss_dataset: 当某个field名称在某个dataset不存在时，如果为True，则直接忽略该DataSet;
            如果为False，则报错
        :param bool delete_vocab: 如果该field也在vocabs中存在，将该值也一并删除
        :return: self
        """
        for name, dataset in self.datasets.items():
            if dataset.has_field(field_name=field_name):
                dataset.delete_field(field_name=field_name)
            elif not ignore_miss_dataset:
                raise KeyError(f"{field_name} not found DataSet:{name}.")
        if delete_vocab:
            if field_name in self.vocabs:
                self.vocabs.pop(field_name)
        return self

    def iter_datasets(self) -> Union[str, DataSet]:
        r"""
        迭代data_bundle中的DataSet

        Example::

            for name, dataset in data_bundle.iter_datasets():
                pass

        :return:
        """
        for name, dataset in self.datasets.items():
            yield name, dataset

    def get_dataset_names(self) -> List[str]:
        r"""
        返回DataBundle中DataSet的名称

        :return:
        """
        return list(self.datasets.keys())

    def get_vocab_names(self) -> List[str]:
        r"""
        返回DataBundle中Vocabulary的名称

        :return:
        """
        return list(self.vocabs.keys())

    def iter_vocabs(self) -> Union[str, Vocabulary]:
        r"""
        迭代data_bundle中的DataSet

        Example:

            for field_name, vocab in data_bundle.iter_vocabs():
                pass

        :return:
        """
        for field_name, vocab in self.vocabs.items():
            yield field_name, vocab

    def apply_field(self, func, field_name: str, new_field_name: str, ignore_miss_dataset=True, **kwargs):
        r"""
        对 :class:`~fastNLP.io.DataBundle` 中所有的dataset使用 :meth:`~fastNLP.DataSet.apply_field` 方法

        :param callable func: input是instance中名为 `field_name` 的field的内容。
        :param str field_name: 传入func的是哪个field。
        :param str new_field_name: 将func返回的内容放入到 `new_field_name` 这个field中，如果名称与已有的field相同，则覆
            盖之前的field。如果为None则不创建新的field。
        :param bool ignore_miss_dataset: 当某个field名称在某个dataset不存在时，如果为True，则直接忽略该DataSet;
            如果为False，则报错
        :param optional kwargs: 支持输入is_input,is_target,ignore_type

            1. is_input: bool, 如果为True则将名为 `new_field_name` 的field设置为input

            2. is_target: bool, 如果为True则将名为 `new_field_name` 的field设置为target

            3. ignore_type: bool, 如果为True则将名为 `new_field_name` 的field的ignore_type设置为true, 忽略其类型
        """
        for name, dataset in self.datasets.items():
            if dataset.has_field(field_name=field_name):
                dataset.apply_field(func=func, field_name=field_name, new_field_name=new_field_name, **kwargs)
            elif not ignore_miss_dataset:
                raise KeyError(f"{field_name} not found DataSet:{name}.")
        return self

    def apply_field_more(self, func, field_name, modify_fields=True, ignore_miss_dataset=True, **kwargs):
        r"""
        对 :class:`~fastNLP.io.DataBundle` 中所有的 dataset 使用 :meth:`~fastNLP.DataSet.apply_field_more` 方法

        .. note::
            ``apply_field_more`` 与 ``apply_field`` 的区别参考 :meth:`fastNLP.DataSet.apply_more` 中关于 ``apply_more`` 与
            ``apply`` 区别的介绍。

        :param callable func: 参数是 ``DataSet`` 中的 ``Instance`` ，返回值是一个字典，key 是field 的名字，value 是对应的结果
        :param str field_name: 传入func的是哪个field。
        :param bool modify_fields: 是否用结果修改 `DataSet` 中的 `Field`， 默认为 True
        :param bool ignore_miss_dataset: 当某个field名称在某个dataset不存在时，如果为True，则直接忽略该DataSet;
            如果为False，则报错
        :param optional kwargs: 支持输入is_input, is_target, ignore_type

            1. is_input: bool, 如果为True则将被修改的field设置为input

            2. is_target: bool, 如果为True则将被修改的field设置为target

            3. ignore_type: bool, 如果为True则将被修改的field的ignore_type设置为true, 忽略其类型

        :return Dict[str:Dict[str:Field]]: 返回一个字典套字典，第一层的 key 是 dataset 的名字，第二层的 key 是 field 的名字
        """
        res = {}
        for name, dataset in self.datasets.items():
            if dataset.has_field(field_name=field_name):
                res[name] = dataset.apply_field_more(func=func, field_name=field_name, modify_fields=modify_fields, **kwargs)
            elif not ignore_miss_dataset:
                raise KeyError(f"{field_name} not found DataSet:{name} .")
        return res

    def apply(self, func, new_field_name: str, **kwargs):
        r"""
        对 :class:`~fastNLP.io.DataBundle` 中所有的 dataset 使用 :meth:`~fastNLP.DataSet.apply` 方法

        对DataBundle中所有的dataset使用apply方法

        :param callable func: input是instance中名为 `field_name` 的field的内容。
        :param str new_field_name: 将func返回的内容放入到 `new_field_name` 这个field中，如果名称与已有的field相同，则覆
            盖之前的field。如果为None则不创建新的field。
        :param optional kwargs: 支持输入is_input,is_target,ignore_type

            1. is_input: bool, 如果为True则将名为 `new_field_name` 的field设置为input

            2. is_target: bool, 如果为True则将名为 `new_field_name` 的field设置为target

            3. ignore_type: bool, 如果为True则将名为 `new_field_name` 的field的ignore_type设置为true, 忽略其类型
        """
        for name, dataset in self.datasets.items():
            dataset.apply(func, new_field_name=new_field_name, **kwargs)
        return self

    def apply_more(self, func, modify_fields=True, **kwargs):
        r"""
        对 :class:`~fastNLP.io.DataBundle` 中所有的 dataset 使用 :meth:`~fastNLP.DataSet.apply_more` 方法

        .. note::
            ``apply_more`` 与 ``apply`` 的区别参考 :meth:`fastNLP.DataSet.apply_more` 中关于 ``apply_more`` 与
            ``apply`` 区别的介绍。

        :param callable func: 参数是 ``DataSet`` 中的 ``Instance`` ，返回值是一个字典，key 是field 的名字，value 是对应的结果
        :param bool modify_fields: 是否用结果修改 ``DataSet`` 中的 ``Field`` ， 默认为 True
        :param optional kwargs: 支持输入is_input,is_target,ignore_type

            1. is_input: bool, 如果为True则将被修改的的field设置为input

            2. is_target: bool, 如果为True则将被修改的的field设置为target

            3. ignore_type: bool, 如果为True则将被修改的的field的ignore_type设置为true, 忽略其类型

        :return Dict[str:Dict[str:Field]]: 返回一个字典套字典，第一层的 key 是 dataset 的名字，第二层的 key 是 field 的名字
        """
        res = {}
        for name, dataset in self.datasets.items():
            res[name] = dataset.apply_more(func, modify_fields=modify_fields, **kwargs)
        return res

    def add_collate_fn(self, fn, name=None):
        r"""
        向所有DataSet增加collate_fn, collate_fn详见 :class:`~fastNLP.DataSet` 中相关说明.

        :param callable fn:
        :param name:
        :return:
        """
        for _, dataset in self.datasets.items():
            dataset.add_collate_fn(fn=fn, name=name)

    def delete_collate_fn(self, name=None):
        r"""
        删除DataSet中的collate_fn

        :param name:
        :return:
        """
        for _, dataset in self.datasets.items():
            dataset.delete_collate_fn(name=name)

    def __repr__(self):
        _str = ''
        if len(self.datasets):
            _str += 'In total {} datasets:\n'.format(self.num_dataset)
            for name, dataset in self.datasets.items():
                _str += '\t{} has {} instances.\n'.format(name, len(dataset))
        if len(self.vocabs):
            _str += 'In total {} vocabs:\n'.format(self.num_vocab)
            for name, vocab in self.vocabs.items():
                _str += '\t{} has {} entries.\n'.format(name, len(vocab))
        return _str
