# Supplementary material
Source: ML conference proceedings conference paper supplement (https://proceedings.neurips.cc/paper_files/paper/2022/hash/0f5fcf4bff73a3537e0813a38f0d3f76-Abstract.html)
Supplement: Supplementary file 1 [file 0f5fcf4bff73a3537e0813a38f0d3f76-Supplemental-Conference.zip › supplemental/transformers/fastNLP/models/base_model.py]

r"""undocumented"""

__all__ = []

import torch

from ..modules.decoder.mlp import MLP


class BaseModel(torch.nn.Module):
    r"""Base PyTorch model for all models.
    """
    
    def __init__(self):
        super(BaseModel, self).__init__()
    
    def fit(self, train_data, dev_data=None, **train_args):
        pass
    
    def predict(self, *args, **kwargs):
        raise NotImplementedError


class NaiveClassifier(BaseModel):
    r"""
    一个简单的分类器例子，可用于各种测试
    """
    def __init__(self, in_feature_dim, out_feature_dim):
        super(NaiveClassifier, self).__init__()
        self.mlp = MLP([in_feature_dim, in_feature_dim, out_feature_dim])
    
    def forward(self, x):
        return {"predict": torch.sigmoid(self.mlp(x))}
    
    def predict(self, x):
        return {"predict": torch.sigmoid(self.mlp(x)) > 0.5}
