# Supplementary material
Source: ML conference proceedings conference paper supplement (https://proceedings.neurips.cc/paper_files/paper/2022/hash/0f5fcf4bff73a3537e0813a38f0d3f76-Abstract.html)
Supplement: Supplementary file 1 [file 0f5fcf4bff73a3537e0813a38f0d3f76-Supplemental-Conference.zip › supplemental/transformers/inference.py]

import argparse
import glob
import json
from multiprocessing import Pool

import torch
from tqdm import tqdm
from transformers import PegasusTokenizer, T5Tokenizer, \
    PegasusForConditionalGeneration, T5ForConditionalGeneration, AutoTokenizer
import os

prompt = {"wiki_bio": "convert the table to text: ",
          "totto_meta": "",
          "common_gen": "generate a sentence with: ",
          "multi_news": "summarize: ",
          "cnndm": "summarize: ",
          "xsum": "summarize: ",
          "wmt16_ROEN": "translate Romanian to English: ",
          "concode": "<java> ",
          "java": "<java> ",
          "python": "<python> "
          }


def str2bool(v):
    if v.lower() in ('yes', 'true', 't', 'y', '1'):
        return True
    elif v.lower() in ('no', 'false', 'f', 'n', '0'):
        return False
    else:
        raise argparse.ArgumentTypeError('Boolean value expected.')


def generate_batch(sources, targets, article_ids, model, device, sys_file, ref_file):
    dct = tokenizer.batch_encode_plus(sources, max_length=args.max_src_len, return_tensors="pt", truncation=True,
                                      padding=True)
    text_id = dct["input_ids"]
    batch_size, seq_len = text_id.size(0), text_id.size(1)

    cand_id = model.generate(
        input_ids=text_id.to(device),
        attention_mask=dct["attention_mask"].to(device),
        args=args
    )
    # sequence_score = ret_dict["sequences_scores"]
    sys_outs = []
    ref_outs = []
    for i in range(batch_size):
        dec = tokenizer.decode(cand_id[i], skip_special_tokens=True, clean_up_tokenization_spaces=False)
        sys_outs.append(dec)
        ref_outs.append(targets[i])

    with open(sys_file, "a") as f:
        for i in range(len(article_ids)):
            inst = {"article_id": article_ids[i], "sys_out": sys_outs[i]}
            print(json.dumps(inst), file=f)
    with open(ref_file, "a") as f:
        for i in range(len(article_ids)):
            inst = {"article_id": article_ids[i], "ref_out": ref_outs[i]}
            print(json.dumps(inst), file=f)


def load_jsonl(path):
    inst_list = []
    begin_idx = 0
    with open(path) as f:
        for line in f:
            inst = json.loads(line)
            inst["article_id"] = str(begin_idx)
            begin_idx += 1
            inst_list.append(inst)
    return inst_list


def split_dataset_into(num_parts=8):
    insts = load_jsonl(test_file)
    insts_every_ds = len(insts) // num_parts
    new_insts = []
    for i in range(num_parts + 1):
        new_insts.append(insts[i * insts_every_ds:(i + 1) * insts_every_ds])
    last_inst = new_insts.pop()
    new_insts[-1].extend(last_inst)
    assert len(new_insts) == num_parts
    return new_insts


def gen_sys_out(inp_args):
    insts_index, ckpt_path = inp_args
    insts = insts_split[insts_index]
    insts_every_ds = args.batch_size
    num_batches = len(insts) // insts_every_ds + 1
    new_insts = []
    for i in range(num_batches):
        insts_batch = insts[i * insts_every_ds:(i + 1) * insts_every_ds]
        new_insts.append(insts_batch)
    device = f'cuda:{insts_index + args.start_gpu}'

    model = torch.load(ckpt_path, map_location=torch.device('cpu'))

    sys_file = ckpt_path.replace("checkpoints", "results").replace(".pt", ".sys")
    ref_file = ckpt_path.replace("checkpoints", "results").replace(".pt", ".ref")

    model.eval()
    model.to(device)
    # path config

    if os.path.exists(sys_file):
        os.remove(sys_file)
    if os.path.exists(ref_file):
        os.remove(ref_file)
    with tqdm(total=len(new_insts)) as pbar:
        for insts_batch in new_insts:
            if "t5" in args.PTM:
                sources = [prompt[args.dataset] + inst_batch["source"] for inst_batch in insts_batch]
            else:
                sources = [inst_batch["source"] for inst_batch in insts_batch]
            if len(sources) == 0:
                break
            targets = [inst_batch["target"] for inst_batch in insts_batch]
            article_ids = [inst_batch["article_id"] for inst_batch in insts_batch]
            generate_batch(sources, targets, article_ids, model, device, sys_file, ref_file)
            pbar.update(1)


# this is a multi-process decoding script
if __name__ == '__main__':
    parser = argparse.ArgumentParser()
    parser.add_argument('--save_path', default=None, type=str)
    parser.add_argument('--ckpt', default="")
    parser.add_argument('--dataset', default=None, required=True)
    parser.add_argument('--start_gpu', default=0, type=int)
    parser.add_argument('--split_num', default=1, type=int)
    parser.add_argument('--batch_size', default=1, type=int)

    parser.add_argument('--max_src_len', default=512, type=int)
    parser.add_argument('--model_name')
    parser.add_argument('--mode', choices=["test", "val"], default="test")
    parser.add_argument('--PTM', choices=["t5", "pegasus", "codet5"])

    parser.add_argument('--beam_size', default=4, type=int)
    parser.add_argument('--early_stop', default=True, type=str2bool)
    parser.add_argument('--no_repeat_ngram', default=4, type=int)
    parser.add_argument('--alpha', default=0.5, type=float)
    parser.add_argument('--min_length', default=5, type=int)
    parser.add_argument('--max_length', default=150, type=int)
    parser.add_argument('--diversity_pen', default=1.0, type=float)
    parser.add_argument('--length_pen', default=2.0, type=float)

    parser.add_argument('--from_pretrained', default=False, type=str2bool)
    parser.add_argument('--baseline', default=False, type=str2bool)

    args = parser.parse_args()
    test_file = f"tokenized_files/{args.dataset}/{args.mode}.{args.PTM}.jsonl"
    insts_split = split_dataset_into(args.split_num)
    if args.PTM == "t5":
        tokenizer = T5Tokenizer.from_pretrained("t5-small", local_files_only=True)
    elif args.PTM == "codet5":
        tokenizer = AutoTokenizer.from_pretrained("Salesforce/codet5-base")
    else:
        tokenizer = PegasusTokenizer.from_pretrained("google/pegasus-xsum")

    if args.save_path is not None:
        ckpts = glob.glob(os.path.join(args.save_path, f'*{args.ckpt}.pt'))
    else:
        ckpts = [args.model_name]
        args.save_path = os.path.join("results", args.model_name)
    print("testing: ", ckpts)

    for ckpt in ckpts:
        if not args.from_pretrained:
            write_dir = args.save_path.replace("checkpoints", "results")
            if not (os.path.exists(write_dir)):
                os.makedirs(write_dir)
            ckpt_path = ckpt
        else:
            ckpt_path = os.path.join("results", ckpt)
            if not (os.path.exists(ckpt_path)):
                os.makedirs(ckpt_path)
        if args.split_num == 1:
            gen_sys_out((0, ckpt))
        else:
            with Pool(args.split_num) as p:
                p.map(gen_sys_out, zip(range(args.split_num), [ckpt_path] * args.split_num))
    # eval_cmd = f"python evaluation/{args.dataset}/eval.py --sys_file {sys_file}"
    # print(eval_cmd)
    # os.system(eval_cmd)
