# Supplementary material
Source: ML conference proceedings conference paper supplement (https://proceedings.neurips.cc/paper_files/paper/2022/hash/0f5fcf4bff73a3537e0813a38f0d3f76-Abstract.html)
Supplement: Supplementary file 1 [file 0f5fcf4bff73a3537e0813a38f0d3f76-Supplemental-Conference.zip › supplemental/transformers/model/metrics.py]

import numpy as np

import json
from os.path import join
import os
import torch
import logging
import tempfile
import subprocess as sp
from datetime import timedelta
from time import time
from itertools import combinations

from pyrouge import Rouge155
from pyrouge.utils import log
from rouge import Rouge, rouge_score
from transformers import BartTokenizer

from fastNLP.core.losses import LossBase
from fastNLP.core.metrics import MetricBase


class Loss(LossBase):
    def __init__(self):
        super(Loss, self).__init__()
        self._init_param_map()

    def get_loss(self, loss):
        return loss


class ValidMetric(MetricBase):
    def __init__(self, save_path, data, dataset, score=None):
        super(ValidMetric, self).__init__()
        self._init_param_map(score=score)
        self.tok = BartTokenizer.from_pretrained("facebook/bart-large-cnn")
        self.save_path = save_path
        self.data = data
        self.dataset = dataset
        self.rouge = Rouge()
        self.ROUGE = 0.0
        self.cur_idx = 0

    # an approximate method of calculating ROUGE
    def fast_rouge(self, dec, ref):
        if dec == '' or ref == '':
            return 0.0
        scores = self.rouge.get_scores(dec, ref)
        return (scores[0]['rouge-1']['f'] + scores[0]['rouge-2']['f'] + scores[0]['rouge-l']['f']) / 3

    def evaluate(self, score, candidate_id):
        batch_size = score.size(0)
        # Fast ROUGE
        for i in range(batch_size):
            ref = ' '.join(self.data[self.cur_idx]['summary'])
            max_idx = int(torch.max(score[i], dim=0).indices)
            max_candidate_id = candidate_id[i][max_idx]
            dec = self.tok.decode(max_candidate_id, skip_special_tokens=True)
            self.ROUGE += self.fast_rouge(dec, ref)
            self.cur_idx += 1

    def get_metric(self, reset=True):
        ROUGE = self.ROUGE / self.cur_idx
        eval_result = {'ROUGE': ROUGE}
        with open(join(self.save_path, 'train_info.txt'), 'a') as f:
            print('ROUGE = {}'.format(ROUGE), file=f)
        if reset:
            self.ROUGE = 0.0
            self.cur_idx = 0
        return eval_result


class MatchRougeMetric(MetricBase):
    def __init__(self, data, dec_path, ref_path, n_total, score=None):
        super(MatchRougeMetric, self).__init__()
        self._init_param_map(score=score)
        self.data = data
        self.dec_path = dec_path
        self.ref_path = ref_path
        self.n_total = n_total
        self.cur_idx = 0
        self.ext = []
        self.start = time()

    def evaluate(self, score):
        with open("scores.txt", "a") as f:
            print(json.dumps(score.detach().cpu().numpy().tolist()), file=f)
        ext = int(torch.max(score, dim=1).indices)  # batch_size = 1
        self.ext.append(ext)
        self.cur_idx += 1
        print('{}/{} ({:.2f}%) decoded in {} seconds\r'.format(
            self.cur_idx, self.n_total, self.cur_idx / self.n_total * 100, timedelta(seconds=int(time() - self.start))
        ), end='')

    def get_metric(self, reset=True):

        print('\nStart writing files !!!')
        for i, ext in enumerate(self.ext):
            sent_ids = self.data[i]['indices'][ext]
            dec, ref = [], []

            for j in sent_ids:
                dec.append(self.data[i]['text'][j])
            for sent in self.data[i]['summary']:
                ref.append(sent)

            with open(join(self.dec_path, '{}.dec'.format(i)), 'w') as f:
                for sent in dec:
                    print(sent, file=f)
            with open(join(self.ref_path, '{}.ref'.format(i)), 'w') as f:
                for sent in ref:
                    print(sent, file=f)

        print('Start evaluating ROUGE score !!!')
        R_1, R_2, R_L = MatchRougeMetric.eval_rouge(self.dec_path, self.ref_path)
        eval_result = {'ROUGE-1': R_1, 'ROUGE-2': R_2, 'ROUGE-L': R_L}

        if reset == True:
            self.cur_idx = 0
            self.ext = []
            self.data = []
            self.start = time()
        return eval_result

    @staticmethod
    def eval_rouge(dec_dir, ref_dir, Print=True):
        assert _ROUGE_PATH is not None
        log.get_global_console_logger().setLevel(logging.WARNING)
        dec_pattern = '(\d+).dec'
        ref_pattern = '#ID#.ref'
        cmd = '-c 95 -r 1000 -n 2 -m'
        with tempfile.TemporaryDirectory() as tmp_dir:
            Rouge155.convert_summaries_to_rouge_format(
                dec_dir, join(tmp_dir, 'dec'))
            Rouge155.convert_summaries_to_rouge_format(
                ref_dir, join(tmp_dir, 'ref'))
            Rouge155.write_config_static(
                join(tmp_dir, 'dec'), dec_pattern,
                join(tmp_dir, 'ref'), ref_pattern,
                join(tmp_dir, 'settings.xml'), system_id=1
            )
            cmd = (join(_ROUGE_PATH, 'ROUGE-1.5.5.pl')
                   + ' -e {} '.format(join(_ROUGE_PATH, 'data'))
                   + cmd
                   + ' -a {}'.format(join(tmp_dir, 'settings.xml')))
            output = sp.check_output(cmd.split(' '), universal_newlines=True)
            R_1 = float(output.split('\n')[3].split(' ')[3])
            R_2 = float(output.split('\n')[7].split(' ')[3])
            R_L = float(output.split('\n')[11].split(' ')[3])
            print(output)
        if Print is True:
            rouge_path = join(dec_dir, '../ROUGE.txt')
            with open(rouge_path, 'w') as f:
                print(output, file=f)
        return R_1, R_2, R_L
