# Supplementary material
Source: ML conference proceedings conference paper supplement (https://proceedings.neurips.cc/paper_files/paper/2022/hash/0f5fcf4bff73a3537e0813a38f0d3f76-Abstract.html)
Supplement: Supplementary file 1 [file 0f5fcf4bff73a3537e0813a38f0d3f76-Supplemental-Conference.zip › supplemental/transformers/preprocess/download_datasets.py]

import datasets
import os
import json

datas = ["wiki_bio", "totto", "common_gen", "multi_news", "xsum"]


def convert_to_jsonl(ds_name):
    dataset_dir = f"datasets/{ds_name}"
    if not os.path.exists(dataset_dir):
        os.makedirs(dataset_dir)
    for key in insts:
        with open(os.path.join(dataset_dir, f"{key}.jsonl"), "w") as f:
            for i in range(len(insts[key])):
                sample = insts[key][i]
                print(json.dumps(sample), file=f)

insts = []
if not os.path.exists("datasets"):
    os.mkdir("datasets")

for dataset in datas:
    insts = datasets.load_dataset(dataset)
    convert_to_jsonl(dataset)
    # eval(f"load_{dataset}()")
