# Supplementary material
Source: ML conference proceedings conference paper supplement (https://proceedings.neurips.cc/paper_files/paper/2022/hash/0f5fcf4bff73a3537e0813a38f0d3f76-Abstract.html)
Supplement: Supplementary file 1 [file 0f5fcf4bff73a3537e0813a38f0d3f76-Supplemental-Conference.zip › supplemental/transformers/preprocess/preprocess_totto.py]

import os
import copy
import torch
from copy import deepcopy
from datasets import DatasetDict
from torch.utils.data import Dataset
from torch.utils.data.dataset import T_co
from tqdm import tqdm
from transformers import AutoTokenizer


def _add_adjusted_col_offsets(table):
    """Add adjusted column offsets to take into account multi-column cells."""
    adjusted_table = []
    for row in table:
        real_col_index = 0
        adjusted_row = []
        for cell in row:
            adjusted_cell = copy.deepcopy(cell)
            adjusted_cell["adjusted_col_start"] = real_col_index
            adjusted_cell["adjusted_col_end"] = (
                    adjusted_cell["adjusted_col_start"] + adjusted_cell["column_span"])
            real_col_index += adjusted_cell["column_span"]
            adjusted_row.append(adjusted_cell)
        adjusted_table.append(adjusted_row)
    return adjusted_table


def _get_heuristic_row_headers(adjusted_table, row_index, col_index):
    """Heuristic to find row headers."""
    row_headers = []
    row = adjusted_table[row_index]
    for i in range(0, col_index):
        if row[i]["is_header"]:
            row_headers.append(row[i])
    return row_headers


def _get_heuristic_col_headers(adjusted_table, row_index, col_index):
    """Heuristic to find column headers."""
    adjusted_cell = adjusted_table[row_index][col_index]
    adjusted_col_start = adjusted_cell["adjusted_col_start"]
    adjusted_col_end = adjusted_cell["adjusted_col_end"]
    col_headers = []
    for r in range(0, row_index):
        row = adjusted_table[r]
        for cell in row:
            if (cell["adjusted_col_start"] < adjusted_col_end and
                    cell["adjusted_col_end"] > adjusted_col_start):
                if cell["is_header"]:
                    col_headers.append(cell)

    return col_headers


def get_highlighted_subtable(table, cell_indices, with_heuristic_headers=False):
    """Extract out the highlighted part of a table."""
    highlighted_table = []

    adjusted_table = _add_adjusted_col_offsets(table)

    for (row_index, col_index) in cell_indices:
        cell = table[row_index][col_index]
        if with_heuristic_headers:
            row_headers = _get_heuristic_row_headers(adjusted_table, row_index,
                                                     col_index)
            col_headers = _get_heuristic_col_headers(adjusted_table, row_index,
                                                     col_index)
        else:
            row_headers = []
            col_headers = []

        highlighted_cell = {
            "cell": cell,
            "row_headers": row_headers,
            "col_headers": col_headers
        }
        highlighted_table.append(highlighted_cell)

    return highlighted_table


def linearize_subtable(subtable, table_page_title, table_section_title):
    """Linearize the highlighted subtable and return a string of its contents."""
    table_str = ""
    if table_page_title:
        table_str += "<page_title> " + table_page_title + " </page_title> "
    if table_section_title:
        table_str += "<section_title> " + table_section_title + " </section_title> "
    table_str += "<table> "

    for item in subtable:
        cell = item["cell"]
        row_headers = item["row_headers"]
        col_headers = item["col_headers"]

        # The value of the cell.
        item_str = "<cell> " + cell["value"] + " "

        # All the column headers associated with this cell.
        for col_header in col_headers:
            item_str += "<col_header> " + col_header["value"] + " </col_header> "

        # All the row headers associated with this cell.
        for row_header in row_headers:
            item_str += "<row_header> " + row_header["value"] + " </row_header> "

        item_str += "</cell> "
        table_str += item_str

    table_str += "</table>"
    return table_str


# class TrainDataset(Dataset):
#
#     def __init__(self, args, raw_datasets, cache_root):
#         # This tab processor is for table truncation and linearize.
#         self.raw_datasets = raw_datasets
#
#         cache_path = os.path.join(cache_root, 'totto_train.cache')
#         if os.path.exists(cache_path) and args.dataset.use_cache:
#             self.data = torch.load(cache_path)
#         else:
#             self.data = []
#             for raw_data in tqdm(self.raw_datasets):
#                 extend_data = deepcopy(raw_data)
#                 table_page_title = extend_data["table_page_title"]
#                 table_section_title = extend_data["table_section_title"]
#                 table = extend_data["table"]
#                 cell_indices = extend_data["highlighted_cells"]
#                 final_sentence = extend_data["final_sentences"][0]
#
#                 subtable = get_highlighted_subtable(
#                         table=table,
#                         cell_indices=cell_indices,
#                         with_heuristic_headers=True)
#                 linear_table = linearize_subtable(
#                         subtable=subtable,
#                         table_page_title=table_page_title,
#                         table_section_title=table_section_title)
#                 seq_out = final_sentence
#
#                 extend_data.update({"struct_in": linear_table,
#                                     "text_in": "",
#                                     "seq_out": seq_out})
#                 self.data.append(extend_data)
#             # if args.dataset.use_cache:
#             #     torch.save(self.data, cache_path)
#
#     def __getitem__(self, index) -> T_co:
#         return self.data[index]
#
#     def __len__(self):
#         return len(self.data)
import json


def load_jsonl(path):
    inst_list = []
    with open(path) as f:
        for line in f:
            inst_list.append(json.loads(line))
    return inst_list


def write_jsonl(insts, path):
    with open(path, "w") as f:
        for inst in insts:
            print(json.dumps(inst), file=f)


tokenizer = AutoTokenizer.from_pretrained("t5-small", local_files_only=True)

new_insts = []
with open("jsonl_files/totto_data/totto_train_data.jsonl") as f:
    for i, line_f in enumerate(f):
        extend_data = json.loads(line_f)
        table_page_title = extend_data["table_page_title"]
        table_section_title = extend_data["table_section_title"]
        table = extend_data["table"]
        cell_indices = extend_data["highlighted_cells"]
        final_sentence = extend_data["sentence_annotations"][0]["final_sentence"]

        subtable = get_highlighted_subtable(
            table=table,
            cell_indices=cell_indices,
            with_heuristic_headers=True)
        linear_table = linearize_subtable(
            subtable=subtable,
            table_page_title=table_page_title,
            table_section_title=table_section_title)
        seq_out = final_sentence

        new_insts.append({"source": linear_table,
                          "target": seq_out, "src_id": tokenizer.encode(linear_table),
                          "tgt_id": tokenizer.encode(seq_out)})

write_jsonl(new_insts, "tokenized_files/totto_meta/train.t5.jsonl")
