# Supplementary material
Source: ML conference proceedings conference paper supplement (https://proceedings.neurips.cc/paper_files/paper/2022/hash/0f5fcf4bff73a3537e0813a38f0d3f76-Abstract.html)
Supplement: Supplementary file 1 [file 0f5fcf4bff73a3537e0813a38f0d3f76-Supplemental-Conference.zip › supplemental/transformers/utils.py]

import os
from os.path import exists, join
import json


def read_jsonl(path):
    data = []
    with open(path) as f:
        for line in f:
            data.append(json.loads(line))
    return data


def get_data_path(mode, PTM, dataset):
    paths = {}
    if mode == 'train':
        paths['train'] = f'tokenized_files/{dataset}/train.{PTM}.jsonl'
    else:
        paths['test'] = f'tokenized_files/{dataset}/{mode}.{PTM}.jsonl'
    return paths


def get_result_path(save_path, cur_model):
    result_path = join(save_path, 'result')
    if not exists(result_path):
        os.makedirs(result_path)
    model_path = join(result_path, cur_model)
    if not exists(model_path):
        os.makedirs(model_path)
    dec_path = join(model_path, 'dec')
    ref_path = join(model_path, 'ref')
    if not exists(dec_path):
        os.makedirs(dec_path)
    if not exists(ref_path):
        os.makedirs(ref_path)
    return dec_path, ref_path
